# Supplementary material
Source: PubMed Central journal article supplement (PMC3934553)
Supplement: NIHMS547963-supplement-Supporting_Information.pdf [file NIHMS547963-supplement-Supporting_Information.pdf]

# Supplementary Material for Molecular Modeling of the ErbB4/HER4 Kinase in the Context of the HER4 Signaling Network Helps Rationalize the Effects of Clinically Identified HER4 Somatic Mutations on the Cell Phenotype

Shannon E. Telesco, Rajanikanth Vadigepalli, Ravi Radhakrishnan

Figure S1: Schematic of the protein-protein interaction network downstream of HER4 activation.

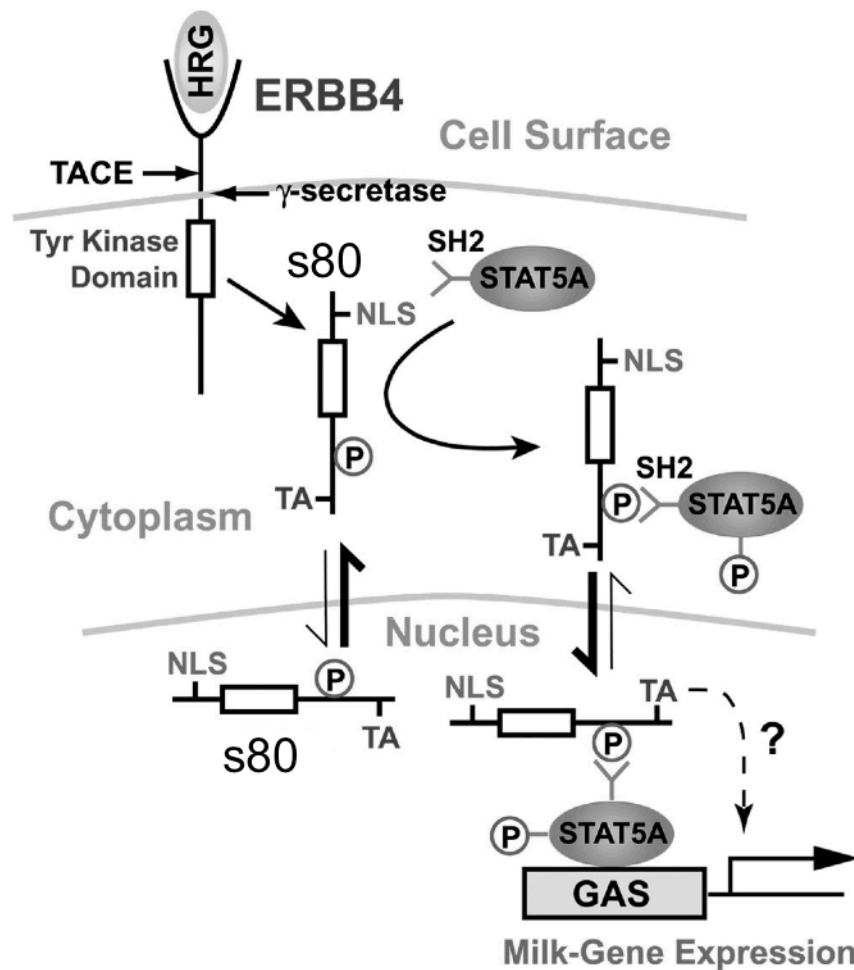

Figure S2: A list of clinical mutations in HER4/ErbB4 and their spatial distribution in the ErbB4 kinase domain.

# Clinical mutations in HER4

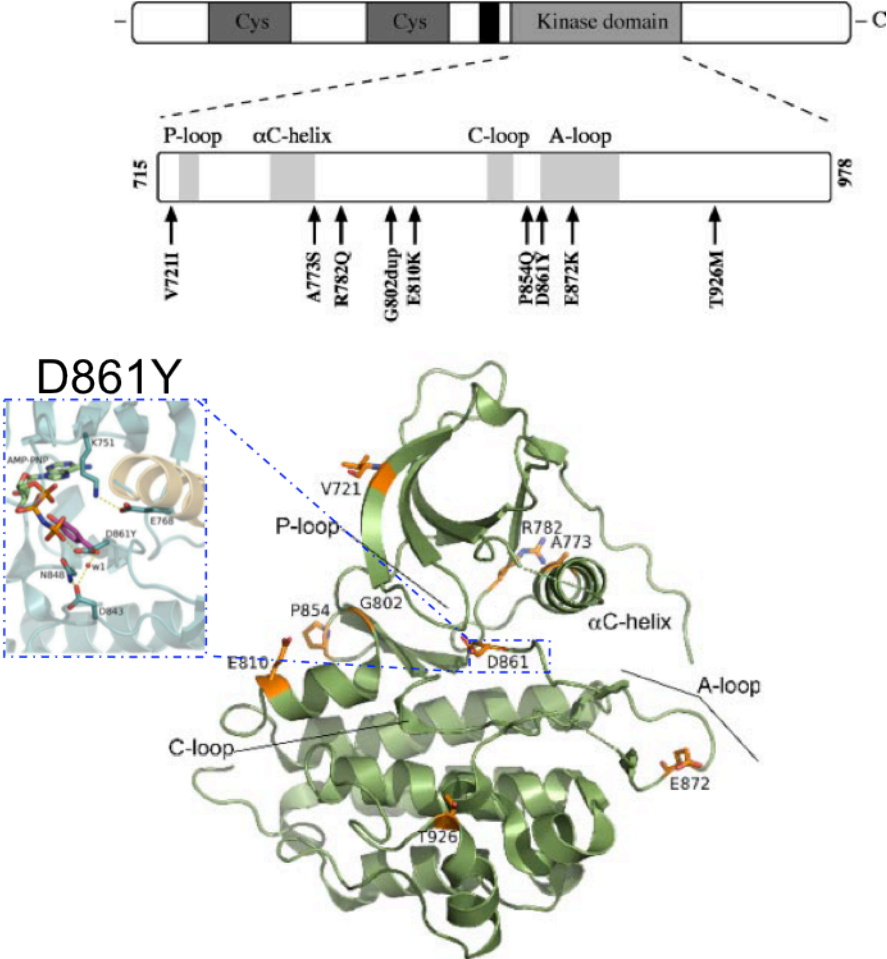

Figure S3: Parameter sensitivity analysis for (A) ppAKT, (B) pSTATn dimers in the wild-type HER4 model in response to 5 nM NRG. (C) Parameter sensitivity analysis for pSTATn\_pSTATn for HER4:JAK2 < 1 and stimulation with 5 nM NRG.

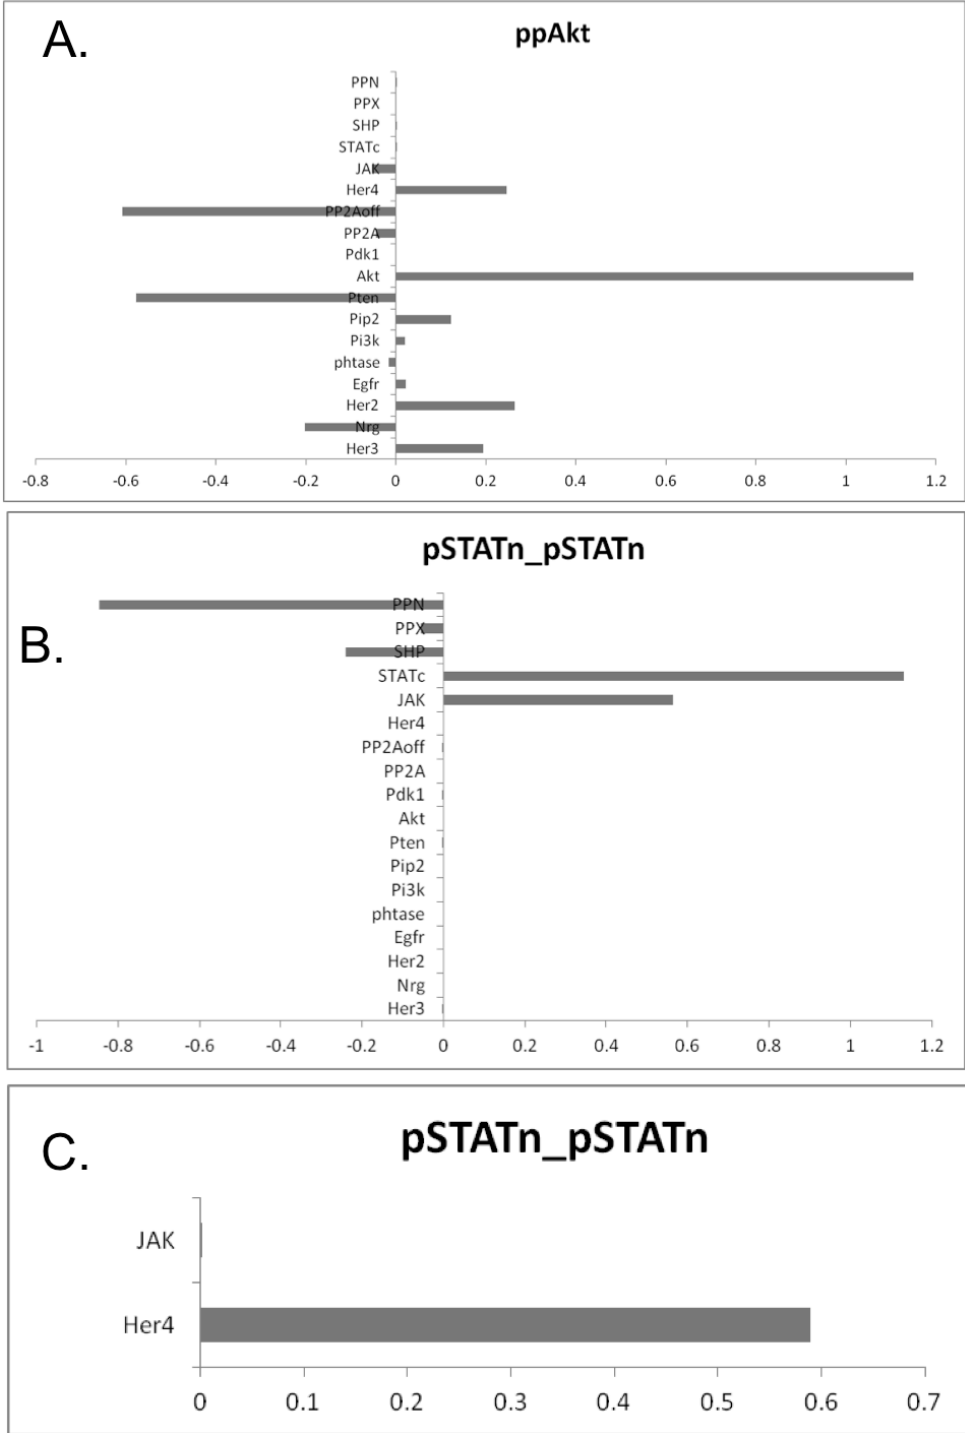

## SBML Model Attachment

```
<?xml version="1.0" encoding="UTF-8" standalone="no"?>
<sbml xmlns="http://www.sbml.org/sbml/level2" level="2" metaid="_000000" version="1">
  <model id="WT_vs_Mutant_Her4" metaid="_000001" name="WTvsMutantHer4">
```

```
    <annotation>
      <rdf:RDF      xmlns:bqbiol="http://biomodels.net/biology-qualifiers/"      xmlns:bqmodel="http://biomodels.net/model-qualifiers/"
      xmlns:dc="http://purl.org/dc/elements/1.1/"      xmlns:dcterms="http://purl.org/dc/terms/"      xmlns:rdf="http://www.w3.org/1999/02/22-rdf-
      syntax-ns#"      xmlns:vCard="http://www.w3.org/2001/vcard-rdf/3.0#">
        <rdf:Description rdf:about="#_000001">
          <dcterms:created rdf:parseType="Resource">
            <dcterms:W3CDTF>2010-11-17T13:34:17-05:00</dcterms:W3CDTF>
          </dcterms:created>
          <dcterms:modified rdf:parseType="Resource">
            <dcterms:W3CDTF>2012-01-10T22:02:29-05:00</dcterms:W3CDTF>
          </dcterms:modified>
        </rdf:Description>
      </rdf:RDF>
    </annotation>
    <listOfUnitDefinitions>
      <unitDefinition id="per_sec" metaid="metaid_0000071">
        <listOfUnits>
          <unit exponent="-1" kind="second" multiplier="1" scale="0"/>
        </listOfUnits>
      </unitDefinition>
      <unitDefinition id="per_molec_sec" metaid="metaid_0000073">
        <listOfUnits>
          <unit exponent="-1" kind="mole" multiplier="6.022e23" scale="0"/>
          <unit exponent="-1" kind="second" multiplier="1" scale="0"/>
        </listOfUnits>
      </unitDefinition>
      <unitDefinition id="molec" metaid="metaid_0000074">
        <listOfUnits>
          <unit exponent="1" kind="mole" multiplier="6.022e23" scale="0"/>
        </listOfUnits>
      </unitDefinition>
```

```
</listOfUnitDefinitions>
<listOfCompartments>
<compartment id="Vcell" metaid="metaid_0000075" size="1e-12"/>
</listOfCompartments>
<listOfSpecies>
<species compartment="Vcell" hasOnlySubstanceUnits="true" id="Her3" initialAmount="33000" metaid="metaid_0000076"
substanceUnits="molec"/>
<species compartment="Vcell" hasOnlySubstanceUnits="true" id="Her3_Nrg" initialAmount="0" metaid="metaid_0000077"
substanceUnits="molec"/>
<species compartment="Vcell" hasOnlySubstanceUnits="true" id="Nrg" initialAmount="10000000" metaid="metaid_0000078"
substanceUnits="molec"/>
<species compartment="Vcell" hasOnlySubstanceUnits="true" id="Her3_2" initialAmount="0" metaid="metaid_0000082"
substanceUnits="molec"/>
<species compartment="Vcell" hasOnlySubstanceUnits="true" id="Her3_2_Nrg" initialAmount="0" metaid="metaid_0000083"
substanceUnits="molec"/>
<species compartment="Vcell" hasOnlySubstanceUnits="true" id="Her2" initialAmount="41000" metaid="metaid_0000084"
substanceUnits="molec"/>
<species compartment="Vcell" hasOnlySubstanceUnits="true" id="pHer3_Nrg" initialAmount="0" metaid="metaid_0000085"
substanceUnits="molec"/>
<species compartment="Vcell" hasOnlySubstanceUnits="true" id="pHer2" initialAmount="0" metaid="metaid_0000086"
substanceUnits="molec"/>
<species compartment="Vcell" hasOnlySubstanceUnits="true" id="pHer3_2_Nrg" initialAmount="0" metaid="metaid_0000087"
substanceUnits="molec"/>
<species compartment="Vcell" hasOnlySubstanceUnits="true" id="Egfr" initialAmount="178000" metaid="metaid_0000088"
substanceUnits="molec"/>
<species compartment="Vcell" hasOnlySubstanceUnits="true" id="Her3_1_Nrg" initialAmount="0" metaid="metaid_0000089"
substanceUnits="molec"/>
<species compartment="Vcell" hasOnlySubstanceUnits="true" id="pHer3_1_Nrg" initialAmount="0" metaid="metaid_0000090"
substanceUnits="molec"/>
<species compartment="Vcell" hasOnlySubstanceUnits="true" id="pHer2_2" initialAmount="0" metaid="metaid_0000091"
substanceUnits="molec"/>
<species compartment="Vcell" hasOnlySubstanceUnits="true" id="Her3_1" initialAmount="0" metaid="metaid_0000092"
substanceUnits="molec"/>
<species compartment="Vcell" hasOnlySubstanceUnits="true" id="Her1_2" initialAmount="0" metaid="metaid_0000093"
substanceUnits="molec"/>
<species compartment="Vcell" hasOnlySubstanceUnits="true" id="Her1_1" initialAmount="0" metaid="metaid_0000094"
substanceUnits="molec"/>
<species compartment="Vcell" hasOnlySubstanceUnits="true" id="Her2_2" initialAmount="0" metaid="metaid_0000095"
substanceUnits="molec"/>
<species compartment="Vcell" hasOnlySubstanceUnits="true" id="phtase" initialAmount="500000" metaid="metaid_0000096"
substanceUnits="molec"/>
<species compartment="Vcell" hasOnlySubstanceUnits="true" id="pHer3_2_Nrg_phtase" initialAmount="0"
metaid="metaid_0000097" substanceUnits="molec"/>
<species compartment="Vcell" hasOnlySubstanceUnits="true" id="pHer3_1_Nrg_phtase" initialAmount="0"
metaid="metaid_0000098" substanceUnits="molec"/>
<species compartment="Vcell" hasOnlySubstanceUnits="true" id="pHer2_2_phtase" initialAmount="0" metaid="metaid_0000099"
substanceUnits="molec"/>
```

<species compartment="Vcell" hasOnlySubstanceUnits="true" id="Pi3k" initialAmount="800000" metaid="metaid\_0000100" substanceUnits="molec"/>  
<species compartment="Vcell" hasOnlySubstanceUnits="true" id="pHer3\_2\_Nrg\_Pi3k" initialAmount="0" metaid="metaid\_0000101" substanceUnits="molec"/>  
<species compartment="Vcell" hasOnlySubstanceUnits="true" id="pHer3\_1\_Nrg\_Pi3k" initialAmount="0" metaid="metaid\_0000102" substanceUnits="molec"/>  
<species compartment="Vcell" hasOnlySubstanceUnits="true" id="pHer2\_2\_Pi3k" initialAmount="0" metaid="metaid\_0000103" substanceUnits="molec"/>  
<species compartment="Vcell" hasOnlySubstanceUnits="true" id="Pip2" initialAmount="700000" metaid="metaid\_0000104" substanceUnits="molec"/>  
<species compartment="Vcell" hasOnlySubstanceUnits="true" id="pHer3\_2\_Nrg\_Pi3k\_Pip2" initialAmount="0" metaid="metaid\_0000105" substanceUnits="molec"/>  
<species compartment="Vcell" hasOnlySubstanceUnits="true" id="pHer3\_1\_Nrg\_Pi3k\_Pip2" initialAmount="0" metaid="metaid\_0000106" substanceUnits="molec"/>  
<species compartment="Vcell" hasOnlySubstanceUnits="true" id="pHer2\_2\_Pi3k\_Pip2" initialAmount="0" metaid="metaid\_0000107" substanceUnits="molec"/>  
<species compartment="Vcell" hasOnlySubstanceUnits="true" id="Pip3" initialAmount="0" metaid="metaid\_0000108" substanceUnits="molec"/>  
<species compartment="Vcell" hasOnlySubstanceUnits="true" id="Pten" initialAmount="350000" metaid="metaid\_0000109" substanceUnits="molec"/>  
<species compartment="Vcell" hasOnlySubstanceUnits="true" id="Pip3\_Pten" initialAmount="0" metaid="metaid\_0000110" substanceUnits="molec"/>  
<species compartment="Vcell" hasOnlySubstanceUnits="true" id="Akt" initialAmount="900000" metaid="metaid\_0000111" substanceUnits="molec"/>  
<species compartment="Vcell" hasOnlySubstanceUnits="true" id="Pip3\_Akt" initialAmount="0" metaid="metaid\_0000112" substanceUnits="molec"/>  
<species compartment="Vcell" hasOnlySubstanceUnits="true" id="Pdk1" initialAmount="9500000" metaid="metaid\_0000113" substanceUnits="molec"/>  
<species compartment="Vcell" hasOnlySubstanceUnits="true" id="Pip3\_Akt\_Pdk1" initialAmount="0" metaid="metaid\_0000114" substanceUnits="molec"/>  
<species compartment="Vcell" hasOnlySubstanceUnits="true" id="Pip3\_Pdk1" initialAmount="0" metaid="metaid\_0000115" substanceUnits="molec"/>  
<species compartment="Vcell" hasOnlySubstanceUnits="true" id="pAkt" initialAmount="0" metaid="metaid\_0000116" substanceUnits="molec"/>  
<species compartment="Vcell" hasOnlySubstanceUnits="true" id="Pip3\_pAkt" initialAmount="0" metaid="metaid\_0000117" substanceUnits="molec"/>  
<species compartment="Vcell" hasOnlySubstanceUnits="true" id="Pip3\_pAkt\_Pdk1" initialAmount="0" metaid="metaid\_0000118" substanceUnits="molec"/>  
<species compartment="Vcell" hasOnlySubstanceUnits="true" id="ppAkt" initialAmount="0" metaid="metaid\_0000119" substanceUnits="molec"/>  
<species compartment="Vcell" hasOnlySubstanceUnits="true" id="PP2A" initialAmount="4000" metaid="metaid\_0000120" substanceUnits="molec"/>  
<species compartment="Vcell" hasOnlySubstanceUnits="true" id="ppAkt\_PP2A" initialAmount="0" metaid="metaid\_0000121" substanceUnits="molec"/>  
<species compartment="Vcell" hasOnlySubstanceUnits="true" id="pAkt\_PP2A" initialAmount="0" metaid="metaid\_0000122" substanceUnits="molec"/>

<species compartment="Vcell" hasOnlySubstanceUnits="true" id="PP2Aoff" initialAmount="64000" metaid="metaid\_0000123" substanceUnits="molec"/>  
<species compartment="Vcell" hasOnlySubstanceUnits="true" id="ppAkt\_PP2Aoff" initialAmount="0" metaid="metaid\_0000124" substanceUnits="molec"/>  
<species compartment="Vcell" hasOnlySubstanceUnits="true" id="pHer3\_total" initialAmount="0" metaid="metaid\_0000125" substanceUnits="molec"/>  
<species compartment="Vcell" hasOnlySubstanceUnits="true" id="pHer2\_total" initialAmount="0" metaid="metaid\_0000126" substanceUnits="molec"/>  
<species compartment="Vcell" hasOnlySubstanceUnits="true" id="pEgfr\_total" initialAmount="0" metaid="metaid\_0000127" substanceUnits="molec"/>  
<species compartment="Vcell" hasOnlySubstanceUnits="true" id="ppAkt\_total" initialAmount="0" metaid="metaid\_0000128" substanceUnits="molec"/>  
<species compartment="Vcell" hasOnlySubstanceUnits="true" id="iHer3\_Nrg" initialAmount="0" metaid="metaid\_0000231" substanceUnits="molec"/>  
<species compartment="Vcell" hasOnlySubstanceUnits="true" id="iHer3\_1\_Nrg" initialAmount="0" metaid="metaid\_0000232" substanceUnits="molec"/>  
<species compartment="Vcell" hasOnlySubstanceUnits="true" id="iNrg" initialAmount="0" metaid="metaid\_0000233" substanceUnits="molec"/>  
<species compartment="Vcell" hasOnlySubstanceUnits="true" id="iHer3" initialAmount="0" metaid="metaid\_0000234" substanceUnits="molec"/>  
<species compartment="Vcell" hasOnlySubstanceUnits="true" id="iHer3\_2" initialAmount="0" metaid="metaid\_0000235" substanceUnits="molec"/>  
<species compartment="Vcell" hasOnlySubstanceUnits="true" id="iHer3\_2\_Nrg" initialAmount="0" metaid="metaid\_0000236" substanceUnits="molec"/>  
<species compartment="Vcell" hasOnlySubstanceUnits="true" id="iHer2" initialAmount="0" metaid="metaid\_0000237" substanceUnits="molec"/>  
<species compartment="Vcell" hasOnlySubstanceUnits="true" id="iEgfr" initialAmount="0" metaid="metaid\_0000238" substanceUnits="molec"/>  
<species compartment="Vcell" hasOnlySubstanceUnits="true" id="iHer3\_1" initialAmount="0" metaid="metaid\_0000239" substanceUnits="molec"/>  
<species compartment="Vcell" hasOnlySubstanceUnits="true" id="iHer2\_1" initialAmount="0" metaid="metaid\_0000240" substanceUnits="molec"/>  
<species compartment="Vcell" hasOnlySubstanceUnits="true" id="iEgfr\_Egfr" initialAmount="0" metaid="metaid\_0000241" substanceUnits="molec"/>  
<species compartment="Vcell" hasOnlySubstanceUnits="true" id="iHer2\_2" initialAmount="0" metaid="metaid\_0000242" substanceUnits="molec"/>  
<species compartment="Vcell" hasOnlySubstanceUnits="true" id="ipHer3\_Nrg" initialAmount="0" metaid="metaid\_0000243" substanceUnits="molec"/>  
<species compartment="Vcell" hasOnlySubstanceUnits="true" id="ipHer2" initialAmount="0" metaid="metaid\_0000244" substanceUnits="molec"/>  
<species compartment="Vcell" hasOnlySubstanceUnits="true" id="ipHer3\_2\_Nrg" initialAmount="0" metaid="metaid\_0000245" substanceUnits="molec"/>  
<species compartment="Vcell" hasOnlySubstanceUnits="true" id="ipHer3\_2\_Nrg\_phtase" initialAmount="0" metaid="metaid\_0000246" substanceUnits="molec"/>  
<species compartment="Vcell" hasOnlySubstanceUnits="true" id="ipHer3\_2\_Nrg\_Pi3k" initialAmount="0" metaid="metaid\_0000247" substanceUnits="molec"/>

<species compartment="Vcell" hasOnlySubstanceUnits="true" id="ipHer3\_2\_Nrg\_Pi3k\_Pip2" initialAmount="0" metaid="metaid\_0000248" substanceUnits="molec"/>  
<species compartment="Vcell" hasOnlySubstanceUnits="true" id="ipHer3\_1\_Nrg" initialAmount="0" metaid="metaid\_0000249" substanceUnits="molec"/>  
<species compartment="Vcell" hasOnlySubstanceUnits="true" id="ipHer3\_1\_Nrg\_phtase" initialAmount="0" metaid="metaid\_0000250" substanceUnits="molec"/>  
<species compartment="Vcell" hasOnlySubstanceUnits="true" id="ipHer3\_1\_Nrg\_Pi3k" initialAmount="0" metaid="metaid\_0000251" substanceUnits="molec"/>  
<species compartment="Vcell" hasOnlySubstanceUnits="true" id="ipHer3\_1\_Nrg\_Pi3k\_Pip2" initialAmount="0" metaid="metaid\_0000252" substanceUnits="molec"/>  
<species compartment="Vcell" hasOnlySubstanceUnits="true" id="ipHer2\_2" initialAmount="0" metaid="metaid\_0000253" substanceUnits="molec"/>  
<species compartment="Vcell" hasOnlySubstanceUnits="true" id="ipHer2\_2\_phtase" initialAmount="0" metaid="metaid\_0000254" substanceUnits="molec"/>  
<species compartment="Vcell" hasOnlySubstanceUnits="true" id="ipHer2\_2\_Pi3k" initialAmount="0" metaid="metaid\_0000255" substanceUnits="molec"/>  
<species compartment="Vcell" hasOnlySubstanceUnits="true" id="ipHer2\_2\_Pi3k\_Pip2" initialAmount="0" metaid="metaid\_0000256" substanceUnits="molec"/>  
<species compartment="Vcell" hasOnlySubstanceUnits="true" id="dNrg" initialAmount="0" metaid="metaid\_0000257" substanceUnits="molec"/>  
<species compartment="Vcell" hasOnlySubstanceUnits="true" id="dHer3\_Nrg" initialAmount="0" metaid="metaid\_0000258" substanceUnits="molec"/>  
<species compartment="Vcell" hasOnlySubstanceUnits="true" id="dpHer3\_Nrg" initialAmount="0" metaid="metaid\_0000259" substanceUnits="molec"/>  
<species compartment="Vcell" hasOnlySubstanceUnits="true" id="dpHer2" initialAmount="0" metaid="metaid\_0000260" substanceUnits="molec"/>  
<species compartment="Vcell" hasOnlySubstanceUnits="true" id="dHer3\_2\_Nrg" initialAmount="0" metaid="metaid\_0000261" substanceUnits="molec"/>  
<species compartment="Vcell" hasOnlySubstanceUnits="true" id="dpHer3\_2\_Nrg" initialAmount="0" metaid="metaid\_0000262" substanceUnits="molec"/>  
<species compartment="Vcell" hasOnlySubstanceUnits="true" id="dpHer3\_2\_Nrg\_phtase" initialAmount="0" metaid="metaid\_0000263" substanceUnits="molec"/>  
<species compartment="Vcell" hasOnlySubstanceUnits="true" id="dpHer3\_2\_Nrg\_Pi3k" initialAmount="0" metaid="metaid\_0000264" substanceUnits="molec"/>  
<species compartment="Vcell" hasOnlySubstanceUnits="true" id="dpHer3\_2\_Nrg\_Pi3k\_Pip2" initialAmount="0" metaid="metaid\_0000265" substanceUnits="molec"/>  
<species compartment="Vcell" hasOnlySubstanceUnits="true" id="dpHer2\_2" initialAmount="0" metaid="metaid\_0000266" substanceUnits="molec"/>  
<species compartment="Vcell" hasOnlySubstanceUnits="true" id="dpHer2\_2\_phtase" initialAmount="0" metaid="metaid\_0000267" substanceUnits="molec"/>  
<species compartment="Vcell" hasOnlySubstanceUnits="true" id="dpHer2\_2\_Pi3k" initialAmount="0" metaid="metaid\_0000268" substanceUnits="molec"/>  
<species compartment="Vcell" hasOnlySubstanceUnits="true" id="dpHer2\_2\_Pi3k\_Pip2" initialAmount="0" metaid="metaid\_0000269" substanceUnits="molec"/>  
<species compartment="Vcell" hasOnlySubstanceUnits="true" id="dHer3\_1\_Nrg" initialAmount="0" metaid="metaid\_0000270" substanceUnits="molec"/>



<species compartment="Vcell" hasOnlySubstanceUnits="true" id="dpHer3\_1\_Nrg" initialAmount="0" metaid="metaid\_0000271" substanceUnits="molec"/>  
<species compartment="Vcell" hasOnlySubstanceUnits="true" id="dpHer3\_1\_Nrg\_phtase" initialAmount="0" metaid="metaid\_0000272" substanceUnits="molec"/>  
<species compartment="Vcell" hasOnlySubstanceUnits="true" id="dpHer3\_1\_Nrg\_Pi3k" initialAmount="0" metaid="metaid\_0000273" substanceUnits="molec"/>  
<species compartment="Vcell" hasOnlySubstanceUnits="true" id="dpHer3\_1\_Nrg\_Pi3k\_Pip2" initialAmount="0" metaid="metaid\_0000274" substanceUnits="molec"/>  
<species compartment="Vcell" hasOnlySubstanceUnits="true" id="Her3\_3" initialAmount="0" metaid="metaid\_0000338" substanceUnits="molec"/>  
<species compartment="Vcell" hasOnlySubstanceUnits="true" id="Her3\_3\_Nrg" initialAmount="0" metaid="metaid\_0000339" substanceUnits="molec"/>  
<species compartment="Vcell" hasOnlySubstanceUnits="true" id="pHer3\_3\_Nrg" initialAmount="0" metaid="metaid\_0000340" substanceUnits="molec"/>  
<species compartment="Vcell" hasOnlySubstanceUnits="true" id="pHer3\_3\_Nrg\_phtase" initialAmount="0" metaid="metaid\_0000341" substanceUnits="molec"/>  
<species compartment="Vcell" hasOnlySubstanceUnits="true" id="pHer3\_3\_Nrg\_Pi3k" initialAmount="0" metaid="metaid\_0000342" substanceUnits="molec"/>  
<species compartment="Vcell" hasOnlySubstanceUnits="true" id="pHer3\_3\_Nrg\_Pi3k\_Pip2" initialAmount="0" metaid="metaid\_0000343" substanceUnits="molec"/>  
<species compartment="Vcell" hasOnlySubstanceUnits="true" id="iHer3\_3\_Nrg" initialAmount="0" metaid="metaid\_0000344" substanceUnits="molec"/>  
<species compartment="Vcell" hasOnlySubstanceUnits="true" id="ipHer3\_3\_Nrg" initialAmount="0" metaid="metaid\_0000345" substanceUnits="molec"/>  
<species compartment="Vcell" hasOnlySubstanceUnits="true" id="ipHer3\_3\_Nrg\_phtase" initialAmount="0" metaid="metaid\_0000346" substanceUnits="molec"/>  
<species compartment="Vcell" hasOnlySubstanceUnits="true" id="ipHer3\_3\_Nrg\_Pi3k" initialAmount="0" metaid="metaid\_0000347" substanceUnits="molec"/>  
<species compartment="Vcell" hasOnlySubstanceUnits="true" id="ipHer3\_3\_Nrg\_Pi3k\_Pip2" initialAmount="0" metaid="metaid\_0000348" substanceUnits="molec"/>  
<species compartment="Vcell" hasOnlySubstanceUnits="true" id="dHer3\_3\_Nrg" initialAmount="0" metaid="metaid\_0000349" substanceUnits="molec"/>  
<species compartment="Vcell" hasOnlySubstanceUnits="true" id="dpHer3\_3\_Nrg" initialAmount="0" metaid="metaid\_0000350" substanceUnits="molec"/>  
<species compartment="Vcell" hasOnlySubstanceUnits="true" id="dpHer3\_3\_Nrg\_phtase" initialAmount="0" metaid="metaid\_0000351" substanceUnits="molec"/>  
<species compartment="Vcell" hasOnlySubstanceUnits="true" id="dpHer3\_3\_Nrg\_Pi3k" initialAmount="0" metaid="metaid\_0000352" substanceUnits="molec"/>  
<species compartment="Vcell" hasOnlySubstanceUnits="true" id="dpHer3\_3\_Nrg\_Pi3k\_Pip2" initialAmount="0" metaid="metaid\_0000353" substanceUnits="molec"/>  
<species compartment="Vcell" hasOnlySubstanceUnits="true" id="Her4" initialAmount="6000" metaid="metaid\_0000375" substanceUnits="molec"/>  
<species compartment="Vcell" hasOnlySubstanceUnits="true" id="Her4\_Nrg" initialAmount="0" metaid="metaid\_0000376" substanceUnits="molec"/>  
<species compartment="Vcell" hasOnlySubstanceUnits="true" id="Her4\_2\_Nrg" initialAmount="0" metaid="metaid\_0000377" substanceUnits="molec"/>

<species compartment="Vcell" hasOnlySubstanceUnits="true" id="Her4\_2" initialAmount="0" metaid="metaid\_0000378" substanceUnits="molec"/>  
<species compartment="Vcell" hasOnlySubstanceUnits="true" id="pHer4\_Nrg" initialAmount="0" metaid="metaid\_0000379" substanceUnits="molec"/>  
<species compartment="Vcell" hasOnlySubstanceUnits="true" id="pHer4\_2\_Nrg" initialAmount="0" metaid="metaid\_0000380" substanceUnits="molec"/>  
<species compartment="Vcell" hasOnlySubstanceUnits="true" id="pHer4\_2\_Nrg\_phtase" initialAmount="0" metaid="metaid\_0000381" substanceUnits="molec"/>  
<species compartment="Vcell" hasOnlySubstanceUnits="true" id="pHer4\_2\_Nrg\_Pi3k" initialAmount="0" metaid="metaid\_0000382" substanceUnits="molec"/>  
<species compartment="Vcell" hasOnlySubstanceUnits="true" id="pHer4\_2\_Nrg\_Pi3k\_Pip2" initialAmount="0" metaid="metaid\_0000383" substanceUnits="molec"/>  
<species compartment="Vcell" hasOnlySubstanceUnits="true" id="iHer4" initialAmount="0" metaid="metaid\_0000384" substanceUnits="molec"/>  
<species compartment="Vcell" hasOnlySubstanceUnits="true" id="iHer4\_Nrg" initialAmount="0" metaid="metaid\_0000385" substanceUnits="molec"/>  
<species compartment="Vcell" hasOnlySubstanceUnits="true" id="iHer4\_2" initialAmount="0" metaid="metaid\_0000386" substanceUnits="molec"/>  
<species compartment="Vcell" hasOnlySubstanceUnits="true" id="iHer4\_2\_Nrg" initialAmount="0" metaid="metaid\_0000387" substanceUnits="molec"/>  
<species compartment="Vcell" hasOnlySubstanceUnits="true" id="ipHer4\_Nrg" initialAmount="0" metaid="metaid\_0000388" substanceUnits="molec"/>  
<species compartment="Vcell" hasOnlySubstanceUnits="true" id="ipHer4\_2\_Nrg" initialAmount="0" metaid="metaid\_0000389" substanceUnits="molec"/>  
<species compartment="Vcell" hasOnlySubstanceUnits="true" id="ipHer4\_2\_Nrg\_phtase" initialAmount="0" metaid="metaid\_0000390" substanceUnits="molec"/>  
<species compartment="Vcell" hasOnlySubstanceUnits="true" id="ipHer4\_2\_Nrg\_Pi3k" initialAmount="0" metaid="metaid\_0000391" substanceUnits="molec"/>  
<species compartment="Vcell" hasOnlySubstanceUnits="true" id="ipHer4\_2\_Nrg\_Pi3k\_Pip2" initialAmount="0" metaid="metaid\_0000392" substanceUnits="molec"/>  
<species compartment="Vcell" hasOnlySubstanceUnits="true" id="iHer4\_4" initialAmount="0" metaid="metaid\_0000393" substanceUnits="molec"/>  
<species compartment="Vcell" hasOnlySubstanceUnits="true" id="iHer4\_3" initialAmount="0" metaid="metaid\_0000394" substanceUnits="molec"/>  
<species compartment="Vcell" hasOnlySubstanceUnits="true" id="iHer4\_1" initialAmount="0" metaid="metaid\_0000395" substanceUnits="molec"/>  
<species compartment="Vcell" hasOnlySubstanceUnits="true" id="Her4\_3" initialAmount="0" metaid="metaid\_0000396" substanceUnits="molec"/>  
<species compartment="Vcell" hasOnlySubstanceUnits="true" id="Her4\_3\_Nrg" initialAmount="0" metaid="metaid\_0000397" substanceUnits="molec"/>  
<species compartment="Vcell" hasOnlySubstanceUnits="true" id="pHer4\_3\_Nrg" initialAmount="0" metaid="metaid\_0000398" substanceUnits="molec"/>  
<species compartment="Vcell" hasOnlySubstanceUnits="true" id="pHer4\_4\_Nrg" initialAmount="0" metaid="metaid\_0000399" substanceUnits="molec"/>  
<species compartment="Vcell" hasOnlySubstanceUnits="true" id="pHer4\_3\_Nrg\_phtase" initialAmount="0" metaid="metaid\_0000400" substanceUnits="molec"/>

<species compartment="Vcell" hasOnlySubstanceUnits="true" id="pHer4\_3\_Nrg\_Pi3k" initialAmount="0" metaid="metaid\_0000401" substanceUnits="molec"/>  
<species compartment="Vcell" hasOnlySubstanceUnits="true" id="pHer4\_3\_Nrg\_Pi3k\_Pip2" initialAmount="0" metaid="metaid\_0000402" substanceUnits="molec"/>  
<species compartment="Vcell" hasOnlySubstanceUnits="true" id="iHer4\_3\_Nrg" initialAmount="0" metaid="metaid\_0000403" substanceUnits="molec"/>  
<species compartment="Vcell" hasOnlySubstanceUnits="true" id="ipHer4\_3\_Nrg" initialAmount="0" metaid="metaid\_0000404" substanceUnits="molec"/>  
<species compartment="Vcell" hasOnlySubstanceUnits="true" id="ipHer4\_3\_Nrg\_phtase" initialAmount="0" metaid="metaid\_0000405" substanceUnits="molec"/>  
<species compartment="Vcell" hasOnlySubstanceUnits="true" id="ipHer4\_3\_Nrg\_Pi3k" initialAmount="0" metaid="metaid\_0000406" substanceUnits="molec"/>  
<species compartment="Vcell" hasOnlySubstanceUnits="true" id="ipHer4\_3\_Nrg\_Pi3k\_Pip2" initialAmount="0" metaid="metaid\_0000407" substanceUnits="molec"/>  
<species compartment="Vcell" hasOnlySubstanceUnits="true" id="Her4\_4" initialAmount="0" metaid="metaid\_0000408" substanceUnits="molec"/>  
<species compartment="Vcell" hasOnlySubstanceUnits="true" id="Her4\_1" initialAmount="0" metaid="metaid\_0000409" substanceUnits="molec"/>  
<species compartment="Vcell" hasOnlySubstanceUnits="true" id="dHer4\_Nrg" initialAmount="0" metaid="metaid\_0000410" substanceUnits="molec"/>  
<species compartment="Vcell" hasOnlySubstanceUnits="true" id="dpHer4\_Nrg" initialAmount="0" metaid="metaid\_0000411" substanceUnits="molec"/>  
<species compartment="Vcell" hasOnlySubstanceUnits="true" id="dHer4\_2\_Nrg" initialAmount="0" metaid="metaid\_0000412" substanceUnits="molec"/>  
<species compartment="Vcell" hasOnlySubstanceUnits="true" id="dpHer4\_2\_Nrg" initialAmount="0" metaid="metaid\_0000413" substanceUnits="molec"/>  
<species compartment="Vcell" hasOnlySubstanceUnits="true" id="dpHer4\_2\_Nrg\_phtase" initialAmount="0" metaid="metaid\_0000414" substanceUnits="molec"/>  
<species compartment="Vcell" hasOnlySubstanceUnits="true" id="dpHer4\_2\_Nrg\_Pi3k" initialAmount="0" metaid="metaid\_0000415" substanceUnits="molec"/>  
<species compartment="Vcell" hasOnlySubstanceUnits="true" id="dpHer4\_2\_Nrg\_Pi3k\_Pip2" initialAmount="0" metaid="metaid\_0000416" substanceUnits="molec"/>  
<species compartment="Vcell" hasOnlySubstanceUnits="true" id="dHer4\_3\_Nrg" initialAmount="0" metaid="metaid\_0000417" substanceUnits="molec"/>  
<species compartment="Vcell" hasOnlySubstanceUnits="true" id="dpHer4\_3\_Nrg" initialAmount="0" metaid="metaid\_0000418" substanceUnits="molec"/>  
<species compartment="Vcell" hasOnlySubstanceUnits="true" id="dpHer4\_3\_Nrg\_phtase" initialAmount="0" metaid="metaid\_0000419" substanceUnits="molec"/>  
<species compartment="Vcell" hasOnlySubstanceUnits="true" id="dpHer4\_3\_Nrg\_Pi3k" initialAmount="0" metaid="metaid\_0000420" substanceUnits="molec"/>  
<species compartment="Vcell" hasOnlySubstanceUnits="true" id="dpHer4\_3\_Nrg\_Pi3k\_Pip2" initialAmount="0" metaid="metaid\_0000421" substanceUnits="molec"/>  
<species compartment="Vcell" hasOnlySubstanceUnits="true" id="JAK" initialAmount="7200" metaid="metaid\_0000422" substanceUnits="molec"/>  
<species compartment="Vcell" hasOnlySubstanceUnits="true" id="STATc" initialAmount="600000" metaid="metaid\_0000423" substanceUnits="molec"/>

<species compartment="Vcell" hasOnlySubstanceUnits="true" id="SHP" initialAmount="60000" metaid="metaid\_0000424" substanceUnits="molec"/>  
<species compartment="Vcell" hasOnlySubstanceUnits="true" id="PPX" initialAmount="30000" metaid="metaid\_0000425" substanceUnits="molec"/>  
<species compartment="Vcell" hasOnlySubstanceUnits="true" id="PPN" initialAmount="36000" metaid="metaid\_0000426" substanceUnits="molec"/>  
<species compartment="Vcell" hasOnlySubstanceUnits="true" id="RJ" initialAmount="0" metaid="metaid\_0000427" substanceUnits="molec"/>  
<species compartment="Vcell" hasOnlySubstanceUnits="true" id="IFNRJ" initialAmount="0" metaid="metaid\_0000428" substanceUnits="molec"/>  
<species compartment="Vcell" hasOnlySubstanceUnits="true" id="IFNRJ2" initialAmount="0" metaid="metaid\_0000429" substanceUnits="molec"/>  
<species compartment="Vcell" hasOnlySubstanceUnits="true" id="pIFNRJ2" initialAmount="0" metaid="metaid\_0000430" substanceUnits="molec"/>  
<species compartment="Vcell" hasOnlySubstanceUnits="true" id="pIFNRJ2\_STATc" initialAmount="0" metaid="metaid\_0000431" substanceUnits="molec"/>  
<species compartment="Vcell" hasOnlySubstanceUnits="true" id="pSTATc" initialAmount="0" metaid="metaid\_0000432" substanceUnits="molec"/>  
<species compartment="Vcell" hasOnlySubstanceUnits="true" id="pIFNRJ2\_pSTATc" initialAmount="0" metaid="metaid\_0000433" substanceUnits="molec"/>  
<species compartment="Vcell" hasOnlySubstanceUnits="true" id="pSTATc\_pSTATc" initialAmount="0" metaid="metaid\_0000434" substanceUnits="molec"/>  
<species compartment="Vcell" hasOnlySubstanceUnits="true" id="pIFNRJ2\_SHP" initialAmount="0" metaid="metaid\_0000435" substanceUnits="molec"/>  
<species compartment="Vcell" hasOnlySubstanceUnits="true" id="PPX\_pSTATc\_pSTATc" initialAmount="0" metaid="metaid\_0000436" substanceUnits="molec"/>  
<species compartment="Vcell" hasOnlySubstanceUnits="true" id="pSTATc\_STATc" initialAmount="0" metaid="metaid\_0000437" substanceUnits="molec"/>  
<species compartment="Vcell" hasOnlySubstanceUnits="true" id="pSTATn" initialAmount="0" metaid="metaid\_0000438" substanceUnits="molec"/>  
<species compartment="Vcell" hasOnlySubstanceUnits="true" id="pSTATn\_pSTATn" initialAmount="0" metaid="metaid\_0000439" substanceUnits="molec"/>  
<species compartment="Vcell" hasOnlySubstanceUnits="true" id="PPN\_pSTATn" initialAmount="0" metaid="metaid\_0000440" substanceUnits="molec"/>  
<species compartment="Vcell" hasOnlySubstanceUnits="true" id="PPN\_pSTATn\_pSTATn" initialAmount="0" metaid="metaid\_0000441" substanceUnits="molec"/>  
<species compartment="Vcell" hasOnlySubstanceUnits="true" id="STATn" initialAmount="0" metaid="metaid\_0000442" substanceUnits="molec"/>  
<species compartment="Vcell" hasOnlySubstanceUnits="true" id="STATn\_pSTATn" initialAmount="0" metaid="metaid\_0000443" substanceUnits="molec"/>  
<species compartment="Vcell" hasOnlySubstanceUnits="true" id="mRNA\_nuc" initialAmount="0" metaid="metaid\_0000444" substanceUnits="molec"/>  
<species compartment="Vcell" hasOnlySubstanceUnits="true" id="mRNA\_cyt" initialAmount="0" metaid="metaid\_0000445" substanceUnits="molec"/>  
<species compartment="Vcell" hasOnlySubstanceUnits="true" id="SOCS" initialAmount="0" metaid="metaid\_0000446" substanceUnits="molec"/>

```
<species compartment="Vcell" hasOnlySubstanceUnits="true" id="SOCS_pIFNRJ2" initialAmount="0" metaid="metaid_0000447"
substanceUnits="molec"/>
<species compartment="Vcell" hasOnlySubstanceUnits="true" id="SOCS_pIFNRJ2_STAT" initialAmount="0"
metaid="metaid_0000448" substanceUnits="molec"/>
<species compartment="Vcell" hasOnlySubstanceUnits="true" id="SOCS_pIFNRJ2_STAT_SHP" initialAmount="0"
metaid="metaid_0000449" substanceUnits="molec"/>
<species compartment="Vcell" hasOnlySubstanceUnits="true" id="pIFNRJ2_STATc_SHP" initialAmount="0"
metaid="metaid_0000450" substanceUnits="molec"/>
<species compartment="Vcell" hasOnlySubstanceUnits="true" id="PPX_pSTATc" initialAmount="0" metaid="metaid_0000451"
substanceUnits="molec"/>
</listOfSpecies>
```

```
<listOfParameters>
```

```
<parameter id="kf1" metaid="metaid_0000178" units="per_molec_sec" value="5e-11"/>
<parameter id="kr1" metaid="metaid_0000179" units="per_sec" value="0.001"/>
<parameter id="kf2" metaid="metaid_0000180" units="per_molec_sec" value="5e-11"/>
<parameter id="kr2" metaid="metaid_0000181" units="per_sec" value="0.001"/>
<parameter id="kf7" metaid="metaid_0000182" units="per_molec_sec" value="3e-6"/>
<parameter id="kr7" metaid="metaid_0000183" units="per_sec" value="0.001"/>
<parameter id="kf10" metaid="metaid_0000184" units="per_molec_sec" value="3e-8"/>
<parameter id="kf12" metaid="metaid_0000185" units="per_molec_sec" value="4.2e-9"/>
<parameter id="kr12" metaid="metaid_0000186" units="per_sec" value="0.001"/>
<parameter id="kf30" metaid="metaid_0000187" units="per_sec" value="1"/>
<parameter id="kf38" metaid="metaid_0000188" units="per_molec_sec" value="5e-6"/>
<parameter id="kr38" metaid="metaid_0000189" units="per_sec" value="0.1"/>
<parameter id="kf45" metaid="metaid_0000190" units="per_sec" value="1"/>
<parameter id="kf52" metaid="metaid_0000191" units="per_molec_sec" value="3e-6"/>
<parameter id="kr52" metaid="metaid_0000192" units="per_sec" value="0.1"/>
<parameter id="kf54" metaid="metaid_0000193" units="per_molec_sec" value="7.5e-7"/>
<parameter id="kr54" metaid="metaid_0000194" units="per_sec" value="0.1"/>
<parameter id="kf59" metaid="metaid_0000195" units="per_molec_sec" value="5e-6"/>
<parameter id="kr59" metaid="metaid_0000196" units="per_sec" value="0.1"/>
<parameter id="kf61" metaid="metaid_0000197" units="per_molec_sec" value="5e-7"/>
<parameter id="kr61" metaid="metaid_0000198" units="per_sec" value="0.1"/>
<parameter id="kf66" metaid="metaid_0000199" units="per_sec" value="0.2"/>
<parameter id="kf68" metaid="metaid_0000200" units="per_sec" value="0.013"/>
<parameter id="kf73" metaid="metaid_0000201" units="per_molec_sec" value="5e-6"/>
<parameter id="kr73" metaid="metaid_0000202" units="per_sec" value="0.1"/>
<parameter id="kf74" metaid="metaid_0000203" units="per_sec" value="0.1"/>
<parameter id="kf75" metaid="metaid_0000204" units="per_molec_sec" value="0.00026"/>
<parameter id="kr75" metaid="metaid_0000205" units="per_sec" value="0.1"/>
<parameter id="kf76" metaid="metaid_0000206" units="per_molec_sec" value="6.7e-5"/>
<parameter id="kr76" metaid="metaid_0000207" units="per_sec" value="0.1"/>
<parameter id="kf77" metaid="metaid_0000208" units="per_sec" value="1"/>
<parameter id="kf78" metaid="metaid_0000209" units="per_sec" value="0.2"/>
<parameter id="kf81" metaid="metaid_0000210" units="per_sec" value="1"/>
```

<parameter id="kf82" metaid="metaid\_0000211" units="per\_molec\_sec" value="1.7e-6"/>  
<parameter id="kr82" metaid="metaid\_0000212" units="per\_sec" value="0.1"/>  
<parameter id="kf83" metaid="metaid\_0000213" units="per\_sec" value="1.5"/>  
<parameter id="kf86" metaid="metaid\_0000214" units="per\_molec\_sec" value="8.3e-9"/>  
<parameter id="kr86" metaid="metaid\_0000215" units="per\_sec" value="0.5"/>  
<parameter id="kf87" metaid="metaid\_0000216" units="per\_sec" value="0.1"/>  
<parameter id="kf88" metaid="metaid\_0000218" units="per\_sec" value="0.1"/>  
<parameter id="kr88" metaid="metaid\_0000219" units="per\_sec" value="0.005"/>  
<parameter id="kf93" metaid="metaid\_0000220" units="per\_sec" value="0.005"/>  
<parameter id="kr93" metaid="metaid\_0000221" units="per\_sec" value="0.005"/>  
<parameter id="kf98" metaid="metaid\_0000222" units="per\_sec" value="0.005"/>  
<parameter id="kr98" metaid="metaid\_0000223" units="per\_sec" value="0.005"/>  
<parameter id="kf127" metaid="metaid\_0000224" units="per\_molec\_sec" value="0.038"/>  
<parameter id="kf185" metaid="metaid\_0000225" units="per\_sec" value="0.002"/>  
<parameter id="kf187" metaid="metaid\_0000226" units="per\_sec" value="0.002"/>  
<parameter id="kf192" metaid="metaid\_0000227" units="per\_sec" value="0.002"/>  
<parameter id="kf201" metaid="metaid\_0000228" units="per\_sec" value="0.002"/>  
<parameter id="kf30\_weak" metaid="metaid\_0000336" units="per\_sec" value="0.001"/>  
<parameter id="kf10\_weak" metaid="metaid\_0000337" units="per\_molec\_sec" value="3e-11"/>  
<parameter id="kf1\_jak" metaid="metaid\_0000452" units="per\_molec\_sec" value="1.7e-4"/>  
<parameter id="kr1\_jak" metaid="metaid\_0000453" units="per\_sec" value="0.05"/>  
<parameter id="kf2\_jak" metaid="metaid\_0000454" units="per\_molec\_sec" value="3.3e-5"/>  
<parameter id="kr2\_jak" metaid="metaid\_0000455" units="per\_sec" value="0.02"/>  
<parameter id="kf3\_jak" metaid="metaid\_0000456" units="per\_molec\_sec" value="6.7e-5"/>  
<parameter id="kr3\_jak" metaid="metaid\_0000457" units="per\_sec" value="0.2"/>  
<parameter id="kf4\_jak" metaid="metaid\_0000458" units="per\_sec" value="0.005"/>  
<parameter id="kf5\_jak" metaid="metaid\_0000459" units="per\_molec\_sec" value="1.3e-5"/>  
<parameter id="kr5\_jak" metaid="metaid\_0000460" units="per\_sec" value="0.8"/>  
<parameter id="kf6\_jak" metaid="metaid\_0000461" units="per\_sec" value="0.4"/>  
<parameter id="kf7\_jak" metaid="metaid\_0000462" units="per\_molec\_sec" value="8.3e-6"/>  
<parameter id="kr7\_jak" metaid="metaid\_0000463" units="per\_sec" value="0.5"/>  
<parameter id="kf8\_jak" metaid="metaid\_0000464" units="per\_molec\_sec" value="3.3e-5"/>  
<parameter id="kr8\_jak" metaid="metaid\_0000465" units="per\_sec" value="0.1"/>  
<parameter id="kf9\_jak" metaid="metaid\_0000466" units="per\_molec\_sec" value="1.7e-6"/>  
<parameter id="kr9\_jak" metaid="metaid\_0000467" units="per\_sec" value="0.2"/>  
<parameter id="kf10\_jak" metaid="metaid\_0000468" units="per\_sec" value="0.003"/>  
<parameter id="kf11\_jak" metaid="metaid\_0000469" units="per\_molec\_sec" value="1.7e-6"/>  
<parameter id="kr11\_jak" metaid="metaid\_0000470" units="per\_sec" value="0.2"/>  
<parameter id="kf12\_jak" metaid="metaid\_0000471" units="per\_sec" value="0.003"/>  
<parameter id="kf13\_jak" metaid="metaid\_0000472" units="per\_molec\_sec" value="3.3e-10"/>  
<parameter id="kr13\_jak" metaid="metaid\_0000473" units="per\_sec" value="0.2"/>  
<parameter id="kf14\_jak" metaid="metaid\_0000474" units="per\_sec" value="0.005"/>  
<parameter id="kf15\_jak" metaid="metaid\_0000475" units="per\_molec\_sec" value="1.7e-6"/>  
<parameter id="kr15\_jak" metaid="metaid\_0000476" units="per\_sec" value="0.2"/>  
<parameter id="kf16\_jak" metaid="metaid\_0000477" units="per\_sec" value="0.005"/>  
<parameter id="kf17\_jak" metaid="metaid\_0000478" units="per\_sec" value="0.05"/>  
<parameter id="kf19\_jak" metaid="metaid\_0000479" units="per\_sec" value="0.001"/>



<parameter id="kdum41" metaid="metaid\_0000631" units="molec" value="1"/>  
<parameter id="kdum42" metaid="metaid\_0000632" units="molec" value="1"/>  
<parameter id="kdum43" metaid="metaid\_0000633" units="molec" value="1"/>  
<parameter id="kdum44" metaid="metaid\_0000634" units="molec" value="1"/>  
<parameter id="kdum45" metaid="metaid\_0000635" units="molec" value="1"/>  
<parameter id="kdum46" metaid="metaid\_0000636" units="molec" value="1"/>  
<parameter id="kdum47" metaid="metaid\_0000637" units="molec" value="1"/>  
<parameter id="kdum48" metaid="metaid\_0000638" units="molec" value="1"/>  
<parameter id="kdum49" metaid="metaid\_0000639" units="molec" value="1"/>  
<parameter id="kdum50" metaid="metaid\_0000640" units="molec" value="1"/>  
<parameter id="kdum51" metaid="metaid\_0000641" units="molec" value="1"/>  
<parameter id="kdum52" metaid="metaid\_0000642" units="molec" value="1"/>  
<parameter id="kdum53" metaid="metaid\_0000643" units="molec" value="1"/>  
<parameter id="kdum54" metaid="metaid\_0000644" units="molec" value="1"/>  
<parameter id="kdum55" metaid="metaid\_0000645" units="molec" value="1"/>  
<parameter id="kdum56" metaid="metaid\_0000646" units="molec" value="1"/>  
<parameter id="kdum57" metaid="metaid\_0000647" units="molec" value="1"/>  
<parameter id="kdum58" metaid="metaid\_0000648" units="molec" value="1"/>  
<parameter id="kdum59" metaid="metaid\_0000649" units="molec" value="1"/>  
<parameter id="kdum60" metaid="metaid\_0000650" units="molec" value="1"/>  
<parameter id="kdum61" metaid="metaid\_0000651" units="molec" value="1"/>  
<parameter id="kdum62" metaid="metaid\_0000652" units="molec" value="1"/>  
<parameter id="kdum63" metaid="metaid\_0000653" units="molec" value="1"/>  
<parameter id="kdum64" metaid="metaid\_0000654" units="molec" value="1"/>  
<parameter id="kdum65" metaid="metaid\_0000655" units="molec" value="1"/>  
<parameter id="kdum66" metaid="metaid\_0000656" units="molec" value="1"/>  
<parameter id="kdum67" metaid="metaid\_0000657" units="molec" value="1"/>  
<parameter id="kdum68" metaid="metaid\_0000658" units="molec" value="1"/>  
<parameter id="kdum69" metaid="metaid\_0000659" units="molec" value="1"/>  
<parameter id="kdum70" metaid="metaid\_0000660" units="molec" value="1"/>  
<parameter id="kdum71" metaid="metaid\_0000661" units="molec" value="1"/>  
<parameter id="kdum72" metaid="metaid\_0000662" units="molec" value="1"/>  
<parameter id="kdum73" metaid="metaid\_0000663" units="molec" value="1"/>  
<parameter id="kdum74" metaid="metaid\_0000664" units="molec" value="1"/>  
<parameter id="kdum75" metaid="metaid\_0000665" units="molec" value="1"/>  
<parameter id="kdum76" metaid="metaid\_0000666" units="molec" value="1"/>  
<parameter id="kdum77" metaid="metaid\_0000667" units="molec" value="1"/>  
<parameter id="kdum78" metaid="metaid\_0000668" units="molec" value="1"/>  
<parameter id="kdum79" metaid="metaid\_0000669" units="molec" value="1"/>  
<parameter id="kdum80" metaid="metaid\_0000670" units="molec" value="1"/>  
</listOfParameters>

<listOfReactions>

<reaction id="R1" metaid="metaid\_0000229" reversible="true">

<listOfReactants>

<speciesReference species="Nrg" stoichiometry="1"/>

<speciesReference species="Her3" stoichiometry="1"/>



```
</listOfReactants>
<listOfProducts>
<speciesReference species="Her3_Nrg" stoichiometry="1"/>
</listOfProducts>
<kineticLaw>
<math xmlns="http://www.w3.org/1998/Math/MathML">
  <apply>
    <minus/>
    <apply>
      <times/>
      <ci> kf1 </ci>
      <ci> Nrg </ci>
      <ci> Her3 </ci>
    </apply>
    <apply>
      <times/>
      <ci> kr1 </ci>
      <ci> Her3_Nrg </ci>
    </apply>
  </apply>
</math>
</kineticLaw>
</reaction>
<reaction id="R2" metaid="metaid_0000129" reversible="true">
<listOfReactants>
<speciesReference species="Nrg" stoichiometry="1"/>
<speciesReference species="Her3_2" stoichiometry="1"/>
</listOfReactants>
<listOfProducts>
<speciesReference species="Her3_2_Nrg" stoichiometry="1"/>
</listOfProducts>
<kineticLaw>
<math xmlns="http://www.w3.org/1998/Math/MathML">
  <apply>
    <minus/>
    <apply>
      <times/>
      <ci> kf2 </ci>
      <ci> Nrg </ci>
      <ci> Her3_2 </ci>
    </apply>
    <apply>
      <times/>
      <ci> kr2 </ci>
      <ci> Her3_2_Nrg </ci>
    </apply>
  </apply>
</math>
</kineticLaw>
</reaction>
```

```

</math>
</kineticLaw>
</reaction>
<reaction id="R7" metaid="metaid_0000130" reversible="true">
<listOfReactants>
<speciesReference species="Her3_Nrg" stoichiometry="1"/>
<speciesReference species="Her2" stoichiometry="1"/>
</listOfReactants>
<listOfProducts>
<speciesReference species="Her3_2_Nrg" stoichiometry="1"/>
</listOfProducts>
<kineticLaw>
<math xmlns="http://www.w3.org/1998/Math/MathML">
<apply>
<minus/>
<apply>
<times/>
<ci> kf7 </ci>
<ci> Her3_Nrg </ci>
<ci> Her2 </ci>
</apply>
<apply>
<times/>
<ci> kr7 </ci>
<ci> Her3_2_Nrg </ci>
</apply>
</apply>
</math>
</kineticLaw>
</reaction>
<reaction id="R8" metaid="metaid_0000131" reversible="true">
<listOfReactants>
<speciesReference species="pHer3_Nrg" stoichiometry="1"/>
<speciesReference species="pHer2" stoichiometry="1"/>
</listOfReactants>
<listOfProducts>
<speciesReference species="pHer3_2_Nrg" stoichiometry="1"/>
</listOfProducts>
<kineticLaw>
<math xmlns="http://www.w3.org/1998/Math/MathML">
<apply>
<minus/>
<apply>
<times/>
<ci> kf7 </ci>
<ci> pHer3_Nrg </ci>
<ci> pHer2 </ci>

```

```

</apply>
<apply>
  <times/>
  <ci> kr7 </ci>
  <ci> pHer3_2_Nrg </ci>
</apply>
</apply>
</math>
</kineticLaw>
</reaction>
<reaction id="R9" metaid="metaid_0000132" reversible="false">
<listOfReactants>
<speciesReference species="pHer3_Nrg" stoichiometry="1"/>
<speciesReference species="Her2" stoichiometry="1"/>
</listOfReactants>
<listOfProducts>
<speciesReference species="pHer3_2_Nrg" stoichiometry="1"/>
</listOfProducts>
<kineticLaw>
<math xmlns="http://www.w3.org/1998/Math/MathML">
  <apply>
    <times/>
    <ci> kf7 </ci>
    <ci> pHer3_Nrg </ci>
    <ci> Her2 </ci>
  </apply>
</math>
</kineticLaw>
</reaction>
<reaction id="R10" metaid="metaid_0000133" reversible="true">
<listOfReactants>
<speciesReference species="Her3_Nrg" stoichiometry="1"/>
<speciesReference species="Egfr" stoichiometry="1"/>
</listOfReactants>
<listOfProducts>
<speciesReference species="Her3_1_Nrg" stoichiometry="1"/>
</listOfProducts>
<kineticLaw>
<math xmlns="http://www.w3.org/1998/Math/MathML">
  <apply>
    <minus/>
    <apply>
      <times/>
      <ci> kf10 </ci>
      <ci> Her3_Nrg </ci>
      <ci> Egfr </ci>
    </apply>
  </apply>

```

```

<apply>
  <times/>
  <ci> kr7 </ci>
  <ci> Her3_1_Nrg </ci>
</apply>
</apply>
</math>
</kineticLaw>
</reaction>
<reaction id="R11" metaid="metaid_0000134" reversible="true">
<listOfReactants>
<speciesReference species="pHer3_Nrg" stoichiometry="1"/>
<speciesReference species="Egfr" stoichiometry="1"/>
</listOfReactants>
<listOfProducts>
<speciesReference species="pHer3_1_Nrg" stoichiometry="1"/>
</listOfProducts>
<kineticLaw>
<math xmlns="http://www.w3.org/1998/Math/MathML">
  <apply>
    <minus/>
    <apply>
      <times/>
      <ci> kf10 </ci>
      <ci> pHer3_Nrg </ci>
      <ci> Egfr </ci>
    </apply>
    <apply>
      <times/>
      <ci> kr7 </ci>
      <ci> pHer3_1_Nrg </ci>
    </apply>
  </apply>
</math>
</kineticLaw>
</reaction>
<reaction id="R12" metaid="metaid_0000135" reversible="false">
<listOfReactants>
<speciesReference species="pHer2" stoichiometry="1"/>
<speciesReference species="Her2" stoichiometry="1"/>
</listOfReactants>
<listOfProducts>
<speciesReference species="pHer2_2" stoichiometry="1"/>
</listOfProducts>
<kineticLaw>
<math xmlns="http://www.w3.org/1998/Math/MathML">
  <apply>

```

```

</times/>
<ci> kf12 </ci>
<ci> pHer2 </ci>
<ci> Her2 </ci>
</apply>
</math>
</kineticLaw>
</reaction>
<reaction id="R13" metaid="metaid_0000136" reversible="true">
<listOfReactants>
<speciesReference species="pHer2" stoichiometry="2"/>
</listOfReactants>
<listOfProducts>
<speciesReference species="pHer2_2" stoichiometry="1"/>
</listOfProducts>
<kineticLaw>
<math xmlns="http://www.w3.org/1998/Math/MathML">
<apply>
<minus/>
<apply>
<times/>
<ci> kf12 </ci>
<ci> pHer2 </ci>
<ci> pHer2 </ci>
</apply>
<apply>
<times/>
<ci> kr12 </ci>
<ci> pHer2_2 </ci>
</apply>
</apply>
</math>
</kineticLaw>
</reaction>
<reaction id="R25" metaid="metaid_0000137" reversible="true">
<listOfReactants>
<speciesReference species="Her3" stoichiometry="1"/>
<speciesReference species="Her2" stoichiometry="1"/>
</listOfReactants>
<listOfProducts>
<speciesReference species="Her3_2" stoichiometry="1"/>
</listOfProducts>
<kineticLaw>
<math xmlns="http://www.w3.org/1998/Math/MathML">
<apply>
<minus/>
<apply>

```

```

</times/>
<ci> kf12 </ci>
<ci> Her3 </ci>
<ci> Her2 </ci>
</apply>
<apply>
</times/>
<ci> kr12 </ci>
<ci> Her3_2 </ci>
</apply>
</apply>
</math>
</kineticLaw>
</reaction>
<reaction id="R26" metaid="metaid_0000138" reversible="true">
<listOfReactants>
<speciesReference species="Her3" stoichiometry="1"/>
<speciesReference species="Egfr" stoichiometry="1"/>
</listOfReactants>
<listOfProducts>
<speciesReference species="Her3_1" stoichiometry="1"/>
</listOfProducts>
<kineticLaw>
<math xmlns="http://www.w3.org/1998/Math/MathML">
<apply>
<minus/>
<apply>
</times/>
<ci> kf12 </ci>
<ci> Her3 </ci>
<ci> Egfr </ci>
</apply>
<apply>
</times/>
<ci> kr12 </ci>
<ci> Her3_1 </ci>
</apply>
</apply>
</math>
</kineticLaw>
</reaction>
<reaction id="R27" metaid="metaid_0000139" reversible="true">
<listOfReactants>
<speciesReference species="Egfr" stoichiometry="1"/>
<speciesReference species="Her2" stoichiometry="1"/>
</listOfReactants>
<listOfProducts>

```

```
<speciesReference species="Her1_2" stoichiometry="1"/>
</listOfProducts>
<kineticLaw>
<math xmlns="http://www.w3.org/1998/Math/MathML">
  <apply>
    <minus/>
    <apply>
      <times/>
      <ci> kf12 </ci>
      <ci> Egfr </ci>
      <ci> Her2 </ci>
    </apply>
  </apply>
  <times/>
  <ci> kr12 </ci>
  <ci> Her1_2 </ci>
</apply>
</math>
</kineticLaw>
</reaction>
<reaction id="R28" metaid="metaid_0000140" reversible="true">
<listOfReactants>
<speciesReference species="Egfr" stoichiometry="2"/>
</listOfReactants>
<listOfProducts>
<speciesReference species="Her1_1" stoichiometry="1"/>
</listOfProducts>
<kineticLaw>
<math xmlns="http://www.w3.org/1998/Math/MathML">
  <apply>
    <minus/>
    <apply>
      <times/>
      <ci> kf12 </ci>
      <ci> Egfr </ci>
      <ci> Egfr </ci>
    </apply>
  </apply>
  <times/>
  <ci> kr12 </ci>
  <ci> Her1_1 </ci>
</apply>
</math>
</kineticLaw>
</reaction>
```

```

<reaction id="R29" metaid="metaid_0000141" reversible="true">
<listOfReactants>
<speciesReference species="Her2" stoichiometry="2"/>
</listOfReactants>
<listOfProducts>
<speciesReference species="Her2_2" stoichiometry="1"/>
</listOfProducts>
<kineticLaw>
<math xmlns="http://www.w3.org/1998/Math/MathML">
<apply>
<minus/>
<apply>
<times/>
<ci> kf12 </ci>
<ci> Her2 </ci>
<ci> Her2 </ci>
</apply>
<apply>
<times/>
<ci> kr12 </ci>
<ci> Her2_2 </ci>
</apply>
</apply>
</math>
</kineticLaw>
</reaction>
<reaction id="R30" metaid="metaid_0000142" reversible="false">
<listOfReactants>
<speciesReference species="Her3_2_Nrg" stoichiometry="1"/>
</listOfReactants>
<listOfProducts>
<speciesReference species="pHer3_2_Nrg" stoichiometry="1"/>
</listOfProducts>
<kineticLaw>
<math xmlns="http://www.w3.org/1998/Math/MathML">
<apply>
<times/>
<ci> kf30 </ci>
<ci> Her3_2_Nrg </ci>
</apply>
</math>
</kineticLaw>
</reaction>
<reaction id="R31" metaid="metaid_0000143" reversible="false">
<listOfReactants>
<speciesReference species="Her3_1_Nrg" stoichiometry="1"/>
</listOfReactants>

```



```

<listOfProducts>
<speciesReference species="pHer3_1_Nrg" stoichiometry="1"/>
</listOfProducts>
<kineticLaw>
<math xmlns="http://www.w3.org/1998/Math/MathML">
  <apply>
    <times/>
    <ci> kf30 </ci>
    <ci> Her3_1_Nrg </ci>
  </apply>
</math>
</kineticLaw>
</reaction>
<reaction id="R36" metaid="metaid_0000145" reversible="false">
<listOfReactants>
<speciesReference species="pHer3_Nrg" stoichiometry="1"/>
</listOfReactants>
<listOfProducts>
<speciesReference species="Her3" stoichiometry="1"/>
<speciesReference species="Nrg" stoichiometry="1"/>
</listOfProducts>
<kineticLaw>
<math xmlns="http://www.w3.org/1998/Math/MathML">
  <apply>
    <times/>
    <ci> kr1 </ci>
    <ci> pHer3_Nrg </ci>
  </apply>
</math>
</kineticLaw>
</reaction>
<reaction id="R38" metaid="metaid_0000146" reversible="true">
<listOfReactants>
<speciesReference species="pHer3_2_Nrg" stoichiometry="1"/>
<speciesReference species="phtase" stoichiometry="1"/>
</listOfReactants>
<listOfProducts>
<speciesReference species="pHer3_2_Nrg_phtase" stoichiometry="1"/>
</listOfProducts>
<kineticLaw>
<math xmlns="http://www.w3.org/1998/Math/MathML">
  <apply>
    <minus/>
    <apply>
      <times/>
      <ci> kf38 </ci>
      <ci> pHer3_2_Nrg </ci>
    </apply>
  </apply>
</math>

```

```

    <ci> phtase </ci>
  </apply>
</apply>
  <times/>
  <ci> kr38 </ci>
  <ci> pHer3_2_Nrg_phtase </ci>
</apply>
</apply>
</math>
</kineticLaw>
</reaction>
<reaction id="R39" metaid="metaid_0000147" reversible="true">
<listOfReactants>
<speciesReference species="pHer3_1_Nrg" stoichiometry="1"/>
<speciesReference species="phtase" stoichiometry="1"/>
</listOfReactants>
<listOfProducts>
<speciesReference species="pHer3_1_Nrg_phtase" stoichiometry="1"/>
</listOfProducts>
<kineticLaw>
<math xmlns="http://www.w3.org/1998/Math/MathML">
  <apply>
    <minus/>
    <apply>
      <times/>
      <ci> kf38 </ci>
      <ci> pHer3_1_Nrg </ci>
      <ci> phtase </ci>
    </apply>
    <apply>
      <times/>
      <ci> kr38 </ci>
      <ci> pHer3_1_Nrg_phtase </ci>
    </apply>
  </apply>
</math>
</kineticLaw>
</reaction>
<reaction id="R44" metaid="metaid_0000148" reversible="true">
<listOfReactants>
<speciesReference species="pHer2_2" stoichiometry="1"/>
<speciesReference species="phtase" stoichiometry="1"/>
</listOfReactants>
<listOfProducts>
<speciesReference species="pHer2_2_phtase" stoichiometry="1"/>
</listOfProducts>
<kineticLaw>

```

```
<math xmlns="http://www.w3.org/1998/Math/MathML">
  <apply>
    <minus/>
    <apply>
      <times/>
      <ci> kf38 </ci>
      <ci> pHer2_2 </ci>
      <ci> phtase </ci>
    </apply>
    <apply>
      <times/>
      <ci> kr38 </ci>
      <ci> pHer2_2_phtase </ci>
    </apply>
  </apply>
</math>
</kineticLaw>
</reaction>
<reaction id="R45" metaid="metaid_0000149" reversible="false">
<listOfReactants>
<speciesReference species="pHer3_2_Nrg_phtase" stoichiometry="1"/>
</listOfReactants>
<listOfProducts>
<speciesReference species="Her3_2_Nrg" stoichiometry="1"/>
<speciesReference species="phtase" stoichiometry="1"/>
</listOfProducts>
<kineticLaw>
<math xmlns="http://www.w3.org/1998/Math/MathML">
  <apply>
    <times/>
    <ci> kf45 </ci>
    <ci> pHer3_2_Nrg_phtase </ci>
  </apply>
</math>
</kineticLaw>
</reaction>
<reaction id="R46" metaid="metaid_0000150" reversible="false">
<listOfReactants>
<speciesReference species="pHer3_1_Nrg_phtase" stoichiometry="1"/>
</listOfReactants>
<listOfProducts>
<speciesReference species="Her3_1_Nrg" stoichiometry="1"/>
<speciesReference species="phtase" stoichiometry="1"/>
</listOfProducts>
<kineticLaw>
<math xmlns="http://www.w3.org/1998/Math/MathML">
  <apply>
```

```

</times/>
<ci> kf45 </ci>
<ci> pHer3_1_Nrg_phtase </ci>
</apply>
</math>
</kineticLaw>
</reaction>
<reaction id="R51" metaid="metaid_0000151" reversible="false">
<listOfReactants>
<speciesReference species="pHer2_2_phtase" stoichiometry="1"/>
</listOfReactants>
<listOfProducts>
<speciesReference species="Her2_2" stoichiometry="1"/>
<speciesReference species="phtase" stoichiometry="1"/>
</listOfProducts>
<kineticLaw>
<math xmlns="http://www.w3.org/1998/Math/MathML">
<apply>
<times/>
<ci> kf45 </ci>
<ci> pHer2_2_phtase </ci>
</apply>
</math>
</kineticLaw>
</reaction>
<reaction id="R52" metaid="metaid_0000152" reversible="true">
<listOfReactants>
<speciesReference species="pHer3_2_Nrg" stoichiometry="1"/>
<speciesReference species="Pi3k" stoichiometry="1"/>
</listOfReactants>
<listOfProducts>
<speciesReference species="pHer3_2_Nrg_Pi3k" stoichiometry="1"/>
</listOfProducts>
<kineticLaw>
<math xmlns="http://www.w3.org/1998/Math/MathML">
<apply>
<minus/>
<apply>
<times/>
<ci> kf52 </ci>
<ci> pHer3_2_Nrg </ci>
<ci> Pi3k </ci>
</apply>
<apply>
<times/>
<ci> kr52 </ci>
<ci> pHer3_2_Nrg_Pi3k </ci>

```

```

    </apply>
  </apply>
</math>
</kineticLaw>
</reaction>
<reaction id="R53" metaid="metaid_0000153" reversible="true">
<listOfReactants>
<speciesReference species="pHer3_1_Nrg" stoichiometry="1"/>
<speciesReference species="Pi3k" stoichiometry="1"/>
</listOfReactants>
<listOfProducts>
<speciesReference species="pHer3_1_Nrg_Pi3k" stoichiometry="1"/>
</listOfProducts>
<kineticLaw>
<math xmlns="http://www.w3.org/1998/Math/MathML">
  <apply>
    <minus/>
    <apply>
      <times/>
      <ci> kf52 </ci>
      <ci> pHer3_1_Nrg </ci>
      <ci> Pi3k </ci>
    </apply>
    <apply>
      <times/>
      <ci> kr52 </ci>
      <ci> pHer3_1_Nrg_Pi3k </ci>
    </apply>
  </apply>
</math>
</kineticLaw>
</reaction>
<reaction id="R54" metaid="metaid_0000154" reversible="true">
<listOfReactants>
<speciesReference species="pHer2_2" stoichiometry="1"/>
<speciesReference species="Pi3k" stoichiometry="1"/>
</listOfReactants>
<listOfProducts>
<speciesReference species="pHer2_2_Pi3k" stoichiometry="1"/>
</listOfProducts>
<kineticLaw>
<math xmlns="http://www.w3.org/1998/Math/MathML">
  <apply>
    <minus/>
    <apply>
      <times/>
      <ci> kf54 </ci>

```

```

    <ci> pHer2_2 </ci>
    <ci> Pi3k </ci>
  </apply>
  <apply>
    <times/>
    <ci> kr54 </ci>
    <ci> pHer2_2_Pi3k </ci>
  </apply>
</apply>
</math>
</kineticLaw>
</reaction>
<reaction id="R59" metaid="metaid_0000155" reversible="true">
<listOfReactants>
<speciesReference species="pHer3_2_Nrg_Pi3k" stoichiometry="1"/>
<speciesReference species="Pip2" stoichiometry="1"/>
</listOfReactants>
<listOfProducts>
<speciesReference species="pHer3_2_Nrg_Pi3k_Pip2" stoichiometry="1"/>
</listOfProducts>
<kineticLaw>
<math xmlns="http://www.w3.org/1998/Math/MathML">
  <apply>
    <minus/>
    <apply>
      <times/>
      <ci> kf59 </ci>
      <ci> pHer3_2_Nrg_Pi3k </ci>
      <ci> Pip2 </ci>
    </apply>
    <apply>
      <times/>
      <ci> kr59 </ci>
      <ci> pHer3_2_Nrg_Pi3k_Pip2 </ci>
    </apply>
  </apply>
</math>
</kineticLaw>
</reaction>
<reaction id="R60" metaid="metaid_0000156" reversible="true">
<listOfReactants>
<speciesReference species="pHer3_1_Nrg_Pi3k" stoichiometry="1"/>
<speciesReference species="Pip2" stoichiometry="1"/>
</listOfReactants>
<listOfProducts>
<speciesReference species="pHer3_1_Nrg_Pi3k_Pip2" stoichiometry="1"/>
</listOfProducts>

```

```

<kineticLaw>
<math xmlns="http://www.w3.org/1998/Math/MathML">
  <apply>
    <minus/>
    <apply>
      <times/>
      <ci> kf59 </ci>
      <ci> pHer3_1_Nrg_Pi3k </ci>
      <ci> Pip2 </ci>
    </apply>
    <apply>
      <times/>
      <ci> kr59 </ci>
      <ci> pHer3_1_Nrg_Pi3k_Pip2 </ci>
    </apply>
  </apply>
</math>
</kineticLaw>
</reaction>
<reaction id="R61" metaid="metaid_0000157" reversible="true">
<listOfReactants>
<speciesReference species="pHer2_2_Pi3k" stoichiometry="1"/>
<speciesReference species="Pip2" stoichiometry="1"/>
</listOfReactants>
<listOfProducts>
<speciesReference species="pHer2_2_Pi3k_Pip2" stoichiometry="1"/>
</listOfProducts>
<kineticLaw>
<math xmlns="http://www.w3.org/1998/Math/MathML">
  <apply>
    <minus/>
    <apply>
      <times/>
      <ci> kf61 </ci>
      <ci> pHer2_2_Pi3k </ci>
      <ci> Pip2 </ci>
    </apply>
    <apply>
      <times/>
      <ci> kr61 </ci>
      <ci> pHer2_2_Pi3k_Pip2 </ci>
    </apply>
  </apply>
</math>
</kineticLaw>
</reaction>
<reaction id="R66" metaid="metaid_0000158" reversible="false">

```

```

<listOfReactants>
<speciesReference species="pHer3_2_Nrg_Pi3k_Pip2" stoichiometry="1"/>
</listOfReactants>
<listOfProducts>
<speciesReference species="pHer3_2_Nrg_Pi3k" stoichiometry="1"/>
<speciesReference species="Pip3" stoichiometry="1"/>
</listOfProducts>
<kineticLaw>
<math xmlns="http://www.w3.org/1998/Math/MathML">
  <apply>
    <times/>
    <ci> kf66 </ci>
    <ci> pHer3_2_Nrg_Pi3k_Pip2 </ci>
  </apply>
</math>
</kineticLaw>
</reaction>
<reaction id="R67" metaid="metaid_0000159" reversible="false">
<listOfReactants>
<speciesReference species="pHer3_1_Nrg_Pi3k_Pip2" stoichiometry="1"/>
</listOfReactants>
<listOfProducts>
<speciesReference species="pHer3_1_Nrg_Pi3k" stoichiometry="1"/>
<speciesReference species="Pip3" stoichiometry="1"/>
</listOfProducts>
<kineticLaw>
<math xmlns="http://www.w3.org/1998/Math/MathML">
  <apply>
    <times/>
    <ci> kf66 </ci>
    <ci> pHer3_1_Nrg_Pi3k_Pip2 </ci>
  </apply>
</math>
</kineticLaw>
</reaction>
<reaction id="R68" metaid="metaid_0000160" reversible="false">
<listOfReactants>
<speciesReference species="pHer2_2_Pi3k_Pip2" stoichiometry="1"/>
</listOfReactants>
<listOfProducts>
<speciesReference species="pHer2_2_Pi3k" stoichiometry="1"/>
<speciesReference species="Pip3" stoichiometry="1"/>
</listOfProducts>
<kineticLaw>
<math xmlns="http://www.w3.org/1998/Math/MathML">
  <apply>
    <times/>

```



```

    <ci> kf68 </ci>
    <ci> pHer2_2_Pi3k_Pip2 </ci>
  </apply>
</math>
</kineticLaw>
</reaction>
<reaction id="R73" metaid="metaid_0000161" reversible="true">
<listOfReactants>
<speciesReference species="Pip3" stoichiometry="1"/>
<speciesReference species="Pten" stoichiometry="1"/>
</listOfReactants>
<listOfProducts>
<speciesReference species="Pip3_Pten" stoichiometry="1"/>
</listOfProducts>
<kineticLaw>
<math xmlns="http://www.w3.org/1998/Math/MathML">
  <apply>
    <minus/>
    <apply>
      <times/>
      <ci> kf73 </ci>
      <ci> Pip3 </ci>
      <ci> Pten </ci>
    </apply>
    <apply>
      <times/>
      <ci> kr73 </ci>
      <ci> Pip3_Pten </ci>
    </apply>
  </apply>
</math>
</kineticLaw>
</reaction>
<reaction id="R74" metaid="metaid_0000162" reversible="false">
<listOfReactants>
<speciesReference species="Pip3_Pten" stoichiometry="1"/>
</listOfReactants>
<listOfProducts>
<speciesReference species="Pip2" stoichiometry="1"/>
<speciesReference species="Pten" stoichiometry="1"/>
</listOfProducts>
<kineticLaw>
<math xmlns="http://www.w3.org/1998/Math/MathML">
  <apply>
    <times/>
    <ci> kf74 </ci>
    <ci> Pip3_Pten </ci>
  </math>

```

```

</apply>
</math>
</kineticLaw>
</reaction>
<reaction id="R75" metaid="metaid_0000163" reversible="true">
<listOfReactants>
<speciesReference species="Pip3" stoichiometry="1"/>
<speciesReference species="Akt" stoichiometry="1"/>
</listOfReactants>
<listOfProducts>
<speciesReference species="Pip3_Akt" stoichiometry="1"/>
</listOfProducts>
<kineticLaw>
<math xmlns="http://www.w3.org/1998/Math/MathML">
<apply>
<minus/>
<apply>
<times/>
<ci> kf75 </ci>
<ci> Pip3 </ci>
<ci> Akt </ci>
</apply>
<apply>
<times/>
<ci> kr75 </ci>
<ci> Pip3_Akt </ci>
</apply>
</apply>
</math>
</kineticLaw>
</reaction>
<reaction id="R76" metaid="metaid_0000164" reversible="true">
<listOfReactants>
<speciesReference species="Pip3_Akt" stoichiometry="1"/>
<speciesReference species="Pdk1" stoichiometry="1"/>
</listOfReactants>
<listOfProducts>
<speciesReference species="Pip3_Akt_Pdk1" stoichiometry="1"/>
</listOfProducts>
<kineticLaw>
<math xmlns="http://www.w3.org/1998/Math/MathML">
<apply>
<minus/>
<apply>
<times/>
<ci> kf76 </ci>
<ci> Pip3_Akt </ci>

```

```
<ci> Pdk1 </ci>
</apply>
<apply>
  <times/>
  <ci> kr76 </ci>
  <ci> Pip3_Akt_Pdk1 </ci>
</apply>
</apply>
</math>
</kineticLaw>
</reaction>
<reaction id="R77" metaid="metaid_0000165" reversible="false">
<listOfReactants>
<speciesReference species="Pip3_Akt_Pdk1" stoichiometry="1"/>
</listOfReactants>
<listOfProducts>
<speciesReference species="Pip3_Pdk1" stoichiometry="1"/>
<speciesReference species="pAkt" stoichiometry="1"/>
</listOfProducts>
<kineticLaw>
<math xmlns="http://www.w3.org/1998/Math/MathML">
  <apply>
    <times/>
    <ci> kf77 </ci>
    <ci> Pip3_Akt_Pdk1 </ci>
  </apply>
</math>
</kineticLaw>
</reaction>
<reaction id="R78" metaid="metaid_0000166" reversible="false">
<listOfReactants>
<speciesReference species="Pip3_Pdk1" stoichiometry="1"/>
</listOfReactants>
<listOfProducts>
<speciesReference species="Pip3" stoichiometry="1"/>
<speciesReference species="Pdk1" stoichiometry="1"/>
</listOfProducts>
<kineticLaw>
<math xmlns="http://www.w3.org/1998/Math/MathML">
  <apply>
    <times/>
    <ci> kf78 </ci>
    <ci> Pip3_Pdk1 </ci>
  </apply>
</math>
</kineticLaw>
</reaction>
```

```

<reaction id="R79" metaid="metaid_0000167" reversible="true">
<listOfReactants>
<speciesReference species="Pip3" stoichiometry="1"/>
<speciesReference species="pAkt" stoichiometry="1"/>
</listOfReactants>
<listOfProducts>
<speciesReference species="Pip3_pAkt" stoichiometry="1"/>
</listOfProducts>
<kineticLaw>
<math xmlns="http://www.w3.org/1998/Math/MathML">
<apply>
<minus/>
<apply>
<times/>
<ci> kf75 </ci>
<ci> Pip3 </ci>
<ci> pAkt </ci>
</apply>
<apply>
<times/>
<ci> kr75 </ci>
<ci> Pip3_pAkt </ci>
</apply>
</apply>
</math>
</kineticLaw>
</reaction>
<reaction id="R80" metaid="metaid_0000168" reversible="true">
<listOfReactants>
<speciesReference species="Pip3_pAkt" stoichiometry="1"/>
<speciesReference species="Pdk1" stoichiometry="1"/>
</listOfReactants>
<listOfProducts>
<speciesReference species="Pip3_pAkt_Pdk1" stoichiometry="1"/>
</listOfProducts>
<kineticLaw>
<math xmlns="http://www.w3.org/1998/Math/MathML">
<apply>
<minus/>
<apply>
<times/>
<ci> kf76 </ci>
<ci> Pip3_pAkt </ci>
<ci> Pdk1 </ci>
</apply>
<apply>
<times/>

```

```

    <ci> kr76 </ci>
    <ci> Pip3_pAkt_Pdk1 </ci>
  </apply>
</math>
</kineticLaw>
</reaction>
<reaction id="R81" metaid="metaid_0000169" reversible="false">
<listOfReactants>
<speciesReference species="Pip3_pAkt_Pdk1" stoichiometry="1"/>
</listOfReactants>
<listOfProducts>
<speciesReference species="Pip3_Pdk1" stoichiometry="1"/>
<speciesReference species="ppAkt" stoichiometry="1"/>
</listOfProducts>
<kineticLaw>
<math xmlns="http://www.w3.org/1998/Math/MathML">
  <apply>
    <times/>
    <ci> kf81 </ci>
    <ci> Pip3_pAkt_Pdk1 </ci>
  </apply>
</math>
</kineticLaw>
</reaction>
<reaction id="R82" metaid="metaid_0000170" reversible="true">
<listOfReactants>
<speciesReference species="ppAkt" stoichiometry="1"/>
<speciesReference species="PP2A" stoichiometry="1"/>
</listOfReactants>
<listOfProducts>
<speciesReference species="ppAkt_PP2A" stoichiometry="1"/>
</listOfProducts>
<kineticLaw>
<math xmlns="http://www.w3.org/1998/Math/MathML">
  <apply>
    <minus/>
    <apply>
      <times/>
      <ci> kf82 </ci>
      <ci> ppAkt </ci>
      <ci> PP2A </ci>
    </apply>
  </apply>
  <times/>
  <ci> kr82 </ci>
  <ci> ppAkt_PP2A </ci>

```

```

    </apply>
  </apply>
</math>
</kineticLaw>
</reaction>
<reaction id="R83" metaid="metaid_0000171" reversible="false">
<listOfReactants>
<speciesReference species="ppAkt_PP2A" stoichiometry="1"/>
</listOfReactants>
<listOfProducts>
<speciesReference species="pAkt" stoichiometry="1"/>
<speciesReference species="PP2A" stoichiometry="1"/>
</listOfProducts>
<kineticLaw>
<math xmlns="http://www.w3.org/1998/Math/MathML">
  <apply>
    <times/>
    <ci> kf83 </ci>
    <ci> ppAkt_PP2A </ci>
  </apply>
</math>
</kineticLaw>
</reaction>
<reaction id="R84" metaid="metaid_0000172" reversible="true">
<listOfReactants>
<speciesReference species="pAkt" stoichiometry="1"/>
<speciesReference species="PP2A" stoichiometry="1"/>
</listOfReactants>
<listOfProducts>
<speciesReference species="pAkt_PP2A" stoichiometry="1"/>
</listOfProducts>
<kineticLaw>
<math xmlns="http://www.w3.org/1998/Math/MathML">
  <apply>
    <minus/>
    <apply>
      <times/>
      <ci> kf82 </ci>
      <ci> pAkt </ci>
      <ci> PP2A </ci>
    </apply>
    <apply>
      <times/>
      <ci> kr82 </ci>
      <ci> pAkt_PP2A </ci>
    </apply>
  </apply>
</math>

```

```

</math>
</kineticLaw>
</reaction>
<reaction id="R85" metaid="metaid_0000173" reversible="false">
<listOfReactants>
<speciesReference species="pAkt_PP2A" stoichiometry="1"/>
</listOfReactants>
<listOfProducts>
<speciesReference species="Akt" stoichiometry="1"/>
<speciesReference species="PP2A" stoichiometry="1"/>
</listOfProducts>
<kineticLaw>
<math xmlns="http://www.w3.org/1998/Math/MathML">
  <apply>
    <times/>
    <ci> kf83 </ci>
    <ci> pAkt_PP2A </ci>
  </apply>
</math>
</kineticLaw>
</reaction>
<reaction id="R86" metaid="metaid_0000174" reversible="true">
<listOfReactants>
<speciesReference species="ppAkt" stoichiometry="1"/>
<speciesReference species="PP2Aoff" stoichiometry="1"/>
</listOfReactants>
<listOfProducts>
<speciesReference species="ppAkt_PP2Aoff" stoichiometry="1"/>
</listOfProducts>
<kineticLaw>
<math xmlns="http://www.w3.org/1998/Math/MathML">
  <apply>
    <minus/>
    <apply>
      <times/>
      <ci> kf86 </ci>
      <ci> ppAkt </ci>
      <ci> PP2Aoff </ci>
    </apply>
  </apply>
  <times/>
  <ci> kr86 </ci>
  <ci> ppAkt_PP2Aoff </ci>
</math>
</kineticLaw>

```

```

</reaction>
<reaction id="R87" metaid="metaid_0000175" reversible="false">
<listOfReactants>
<speciesReference species="ppAkt_PP2Aoff" stoichiometry="1"/>
</listOfReactants>
<listOfProducts>
<speciesReference species="ppAkt" stoichiometry="1"/>
<speciesReference species="PP2A" stoichiometry="1"/>
</listOfProducts>
<kineticLaw>
<math xmlns="http://www.w3.org/1998/Math/MathML">
  <apply>
    <times/>
    <ci> kf87 </ci>
    <ci> ppAkt_PP2Aoff </ci>
  </apply>
</math>
</kineticLaw>
</reaction>
<reaction id="R88" metaid="metaid_0000275" reversible="true">
<listOfReactants>
<speciesReference species="Her3_Nrg" stoichiometry="1"/>
</listOfReactants>
<listOfProducts>
<speciesReference species="iHer3_Nrg" stoichiometry="1"/>
</listOfProducts>
<kineticLaw>
<math xmlns="http://www.w3.org/1998/Math/MathML">
  <apply>
    <minus/>
    <apply>
      <times/>
      <ci> kf88 </ci>
      <ci> Her3_Nrg </ci>
    </apply>
    <apply>
      <times/>
      <ci> kr88 </ci>
      <ci> iHer3_Nrg </ci>
    </apply>
  </apply>
</math>
</kineticLaw>
</reaction>
<reaction id="R89" metaid="metaid_0000276" reversible="true">
<listOfReactants>
<speciesReference species="pHer3_Nrg" stoichiometry="1"/>

```



```
</listOfReactants>
<listOfProducts>
<speciesReference species="ipHer3_Nrg" stoichiometry="1"/>
</listOfProducts>
<kineticLaw>
<math xmlns="http://www.w3.org/1998/Math/MathML">
  <apply>
    <minus/>
    <apply>
      <times/>
      <ci> kf88 </ci>
      <ci> pHer3_Nrg </ci>
    </apply>
    <apply>
      <times/>
      <ci> kr88 </ci>
      <ci> ipHer3_Nrg </ci>
    </apply>
  </apply>
</math>
</kineticLaw>
</reaction>
<reaction id="R90" metaid="metaid_0000277" reversible="true">
<listOfReactants>
<speciesReference species="pHer2" stoichiometry="1"/>
</listOfReactants>
<listOfProducts>
<speciesReference species="ipHer2" stoichiometry="1"/>
</listOfProducts>
<kineticLaw>
<math xmlns="http://www.w3.org/1998/Math/MathML">
  <apply>
    <minus/>
    <apply>
      <times/>
      <ci> kf88 </ci>
      <ci> pHer2 </ci>
    </apply>
    <apply>
      <times/>
      <ci> kr88 </ci>
      <ci> ipHer2 </ci>
    </apply>
  </apply>
</math>
</kineticLaw>
</reaction>
```

```

<reaction id="R93" metaid="metaid_0000278" reversible="true">
<listOfReactants>
<speciesReference species="Her3_2_Nrg" stoichiometry="1"/>
</listOfReactants>
<listOfProducts>
<speciesReference species="iHer3_2_Nrg" stoichiometry="1"/>
</listOfProducts>
<kineticLaw>
<math xmlns="http://www.w3.org/1998/Math/MathML">
<apply>
<minus/>
<apply>
<times/>
<ci> kf93 </ci>
<ci> Her3_2_Nrg </ci>
</apply>
<apply>
<times/>
<ci> kr93 </ci>
<ci> iHer3_2_Nrg </ci>
</apply>
</apply>
</math>
</kineticLaw>
</reaction>
<reaction id="R94" metaid="metaid_0000279" reversible="true">
<listOfReactants>
<speciesReference species="pHer3_2_Nrg" stoichiometry="1"/>
</listOfReactants>
<listOfProducts>
<speciesReference species="ipHer3_2_Nrg" stoichiometry="1"/>
</listOfProducts>
<kineticLaw>
<math xmlns="http://www.w3.org/1998/Math/MathML">
<apply>
<minus/>
<apply>
<times/>
<ci> kf93 </ci>
<ci> pHer3_2_Nrg </ci>
</apply>
<apply>
<times/>
<ci> kr93 </ci>
<ci> ipHer3_2_Nrg </ci>
</apply>
</apply>
</math>
</kineticLaw>
</reaction>

```

```
</math>
</kineticLaw>
</reaction>
<reaction id="R95" metaid="metaid_0000280" reversible="true">
<listOfReactants>
<speciesReference species="pHer3_2_Nrg_phtase" stoichiometry="1"/>
</listOfReactants>
<listOfProducts>
<speciesReference species="ipHer3_2_Nrg_phtase" stoichiometry="1"/>
</listOfProducts>
<kineticLaw>
<math xmlns="http://www.w3.org/1998/Math/MathML">
  <apply>
    <minus/>
    <apply>
      <times/>
      <ci> kf93 </ci>
      <ci> pHer3_2_Nrg_phtase </ci>
    </apply>
    <apply>
      <times/>
      <ci> kr93 </ci>
      <ci> ipHer3_2_Nrg_phtase </ci>
    </apply>
  </apply>
</math>
</kineticLaw>
</reaction>
<reaction id="R96" metaid="metaid_0000281" reversible="true">
<listOfReactants>
<speciesReference species="pHer3_2_Nrg_Pi3k" stoichiometry="1"/>
</listOfReactants>
<listOfProducts>
<speciesReference species="ipHer3_2_Nrg_Pi3k" stoichiometry="1"/>
</listOfProducts>
<kineticLaw>
<math xmlns="http://www.w3.org/1998/Math/MathML">
  <apply>
    <minus/>
    <apply>
      <times/>
      <ci> kf93 </ci>
      <ci> pHer3_2_Nrg_Pi3k </ci>
    </apply>
    <apply>
      <times/>
      <ci> kr93 </ci>
```

```

    <ci> ipHer3_2_Nrg_Pi3k </ci>
  </apply>
</apply>
</math>
</kineticLaw>
</reaction>
<reaction id="R97" metaid="metaid_0000282" reversible="true">
<listOfReactants>
<speciesReference species="pHer3_2_Nrg_Pi3k_Pip2" stoichiometry="1"/>
</listOfReactants>
<listOfProducts>
<speciesReference species="ipHer3_2_Nrg_Pi3k_Pip2" stoichiometry="1"/>
</listOfProducts>
<kineticLaw>
<math xmlns="http://www.w3.org/1998/Math/MathML">
  <apply>
    <minus/>
    <apply>
      <times/>
      <ci> kf93 </ci>
      <ci> pHer3_2_Nrg_Pi3k_Pip2 </ci>
    </apply>
    <apply>
      <times/>
      <ci> kr93 </ci>
      <ci> ipHer3_2_Nrg_Pi3k_Pip2 </ci>
    </apply>
  </apply>
</math>
</kineticLaw>
</reaction>
<reaction id="R98" metaid="metaid_0000283" reversible="true">
<listOfReactants>
<speciesReference species="Her3_1_Nrg" stoichiometry="1"/>
</listOfReactants>
<listOfProducts>
<speciesReference species="iHer3_1_Nrg" stoichiometry="1"/>
</listOfProducts>
<kineticLaw>
<math xmlns="http://www.w3.org/1998/Math/MathML">
  <apply>
    <minus/>
    <apply>
      <times/>
      <ci> kf98 </ci>
      <ci> Her3_1_Nrg </ci>
    </apply>
  </apply>

```

```

<apply>
  <times/>
  <ci> kr98 </ci>
  <ci> iHer3_1_Nrg </ci>
</apply>
</apply>
</math>
</kineticLaw>
</reaction>
<reaction id="R99" metaid="metaid_0000284" reversible="true">
<listOfReactants>
<speciesReference species="pHer3_1_Nrg" stoichiometry="1"/>
</listOfReactants>
<listOfProducts>
<speciesReference species="ipHer3_1_Nrg" stoichiometry="1"/>
</listOfProducts>
<kineticLaw>
<math xmlns="http://www.w3.org/1998/Math/MathML">
  <apply>
    <minus/>
    <apply>
      <times/>
      <ci> kf98 </ci>
      <ci> pHer3_1_Nrg </ci>
    </apply>
    <apply>
      <times/>
      <ci> kr98 </ci>
      <ci> ipHer3_1_Nrg </ci>
    </apply>
  </apply>
</math>
</kineticLaw>
</reaction>
<reaction id="R100" metaid="metaid_0000285" reversible="true">
<listOfReactants>
<speciesReference species="pHer3_1_Nrg_phtase" stoichiometry="1"/>
</listOfReactants>
<listOfProducts>
<speciesReference species="ipHer3_1_Nrg_phtase" stoichiometry="1"/>
</listOfProducts>
<kineticLaw>
<math xmlns="http://www.w3.org/1998/Math/MathML">
  <apply>
    <minus/>
    <apply>
      <times/>

```

```

    <ci> kf98 </ci>
    <ci> pHer3_1_Nrg_phtase </ci>
  </apply>
  <apply>
    <times/>
    <ci> kr98 </ci>
    <ci> ipHer3_1_Nrg_phtase </ci>
  </apply>
</apply>
</math>
</kineticLaw>
</reaction>
<reaction id="R101" metaid="metaid_0000286" reversible="true">
<listOfReactants>
<speciesReference species="pHer3_1_Nrg_Pi3k" stoichiometry="1"/>
</listOfReactants>
<listOfProducts>
<speciesReference species="ipHer3_1_Nrg_Pi3k" stoichiometry="1"/>
</listOfProducts>
<kineticLaw>
<math xmlns="http://www.w3.org/1998/Math/MathML">
  <apply>
    <minus/>
    <apply>
      <times/>
      <ci> kf98 </ci>
      <ci> pHer3_1_Nrg_Pi3k </ci>
    </apply>
    <apply>
      <times/>
      <ci> kr98 </ci>
      <ci> ipHer3_1_Nrg_Pi3k </ci>
    </apply>
  </apply>
</math>
</kineticLaw>
</reaction>
<reaction id="R102" metaid="metaid_0000287" reversible="true">
<listOfReactants>
<speciesReference species="pHer3_1_Nrg_Pi3k_Pip2" stoichiometry="1"/>
</listOfReactants>
<listOfProducts>
<speciesReference species="ipHer3_1_Nrg_Pi3k_Pip2" stoichiometry="1"/>
</listOfProducts>
<kineticLaw>
<math xmlns="http://www.w3.org/1998/Math/MathML">
  <apply>

```

```

<minus/>
<apply>
  <times/>
  <ci> kf98 </ci>
  <ci> pHer3_1_Nrg_Pi3k_Pip2 </ci>
</apply>
<apply>
  <times/>
  <ci> kr98 </ci>
  <ci> ipHer3_1_Nrg_Pi3k_Pip2 </ci>
</apply>
</apply>
</math>
</kineticLaw>
</reaction>
<reaction id="R103" metaid="metaid_0000288" reversible="true">
<listOfReactants>
<speciesReference species="pHer2_2" stoichiometry="1"/>
</listOfReactants>
<listOfProducts>
<speciesReference species="ipHer2_2" stoichiometry="1"/>
</listOfProducts>
<kineticLaw>
<math xmlns="http://www.w3.org/1998/Math/MathML">
  <apply>
    <minus/>
    <apply>
      <times/>
      <ci> kf93 </ci>
      <ci> pHer2_2 </ci>
    </apply>
    <apply>
      <times/>
      <ci> kr93 </ci>
      <ci> ipHer2_2 </ci>
    </apply>
  </apply>
</math>
</kineticLaw>
</reaction>
<reaction id="R104" metaid="metaid_0000289" reversible="true">
<listOfReactants>
<speciesReference species="pHer2_2_phtase" stoichiometry="1"/>
</listOfReactants>
<listOfProducts>
<speciesReference species="ipHer2_2_phtase" stoichiometry="1"/>
</listOfProducts>

```

```

<kineticLaw>
<math xmlns="http://www.w3.org/1998/Math/MathML">
  <apply>
    <minus/>
    <apply>
      <times/>
      <ci> kf93 </ci>
      <ci> pHer2_2_phtase </ci>
    </apply>
    <apply>
      <times/>
      <ci> kr93 </ci>
      <ci> ipHer2_2_phtase </ci>
    </apply>
  </apply>
</math>
</kineticLaw>
</reaction>
<reaction id="R105" metaid="metaid_0000290" reversible="true">
<listOfReactants>
<speciesReference species="pHer2_2_Pi3k" stoichiometry="1"/>
</listOfReactants>
<listOfProducts>
<speciesReference species="ipHer2_2_Pi3k" stoichiometry="1"/>
</listOfProducts>
<kineticLaw>
<math xmlns="http://www.w3.org/1998/Math/MathML">
  <apply>
    <minus/>
    <apply>
      <times/>
      <ci> kf93 </ci>
      <ci> pHer2_2_Pi3k </ci>
    </apply>
    <apply>
      <times/>
      <ci> kr93 </ci>
      <ci> ipHer2_2_Pi3k </ci>
    </apply>
  </apply>
</math>
</kineticLaw>
</reaction>
<reaction id="R106" metaid="metaid_0000291" reversible="true">
<listOfReactants>
<speciesReference species="pHer2_2_Pi3k_Pip2" stoichiometry="1"/>
</listOfReactants>

```



```
<listOfProducts>
<speciesReference species="ipHer2_2_Pi3k_Pip2" stoichiometry="1"/>
</listOfProducts>
<kineticLaw>
<math xmlns="http://www.w3.org/1998/Math/MathML">
  <apply>
    <minus/>
    <apply>
      <times/>
      <ci> kf93 </ci>
      <ci> pHer2_2_Pi3k_Pip2 </ci>
    </apply>
    <apply>
      <times/>
      <ci> kr93 </ci>
      <ci> ipHer2_2_Pi3k_Pip2 </ci>
    </apply>
  </apply>
</math>
</kineticLaw>
</reaction>
<reaction id="R127" metaid="metaid_0000292" reversible="true">
<listOfReactants>
<speciesReference species="iNrg" stoichiometry="1"/>
<speciesReference species="iHer3" stoichiometry="1"/>
</listOfReactants>
<listOfProducts>
<speciesReference species="iHer3_Nrg" stoichiometry="1"/>
</listOfProducts>
<kineticLaw>
<math xmlns="http://www.w3.org/1998/Math/MathML">
  <apply>
    <minus/>
    <apply>
      <times/>
      <ci> kf127 </ci>
      <ci> iNrg </ci>
      <ci> iHer3 </ci>
    </apply>
    <apply>
      <times/>
      <ci> kr1 </ci>
      <ci> iHer3_Nrg </ci>
    </apply>
  </apply>
</math>
</kineticLaw>
```

```
</reaction>
<reaction id="R128" metaid="metaid_0000293" reversible="true">
<listOfReactants>
<speciesReference species="iNrg" stoichiometry="1"/>
<speciesReference species="iHer3_2" stoichiometry="1"/>
</listOfReactants>
<listOfProducts>
<speciesReference species="iHer3_2_Nrg" stoichiometry="1"/>
</listOfProducts>
<kineticLaw>
<math xmlns="http://www.w3.org/1998/Math/MathML">
<apply>
<minus/>
<apply>
<times/>
<ci> kf127 </ci>
<ci> iNrg </ci>
<ci> iHer3_2 </ci>
</apply>
<apply>
<times/>
<ci> kr1 </ci>
<ci> iHer3_2_Nrg </ci>
</apply>
</apply>
</math>
</kineticLaw>
</reaction>
<reaction id="R133" metaid="metaid_0000294" reversible="true">
<listOfReactants>
<speciesReference species="iHer3_Nrg" stoichiometry="1"/>
<speciesReference species="iHer2" stoichiometry="1"/>
</listOfReactants>
<listOfProducts>
<speciesReference species="iHer3_2_Nrg" stoichiometry="1"/>
</listOfProducts>
<kineticLaw>
<math xmlns="http://www.w3.org/1998/Math/MathML">
<apply>
<minus/>
<apply>
<times/>
<ci> kf7 </ci>
<ci> iHer3_Nrg </ci>
<ci> iHer2 </ci>
</apply>
</apply>
</math>
</kineticLaw>
</reaction>
```

```

    </times/>
    <ci> kr7 </ci>
    <ci> iHer3_2_Nrg </ci>
  </apply>
</apply>
</math>
</kineticLaw>
</reaction>
<reaction id="R134" metaid="metaid_0000295" reversible="true">
<listOfReactants>
<speciesReference species="ipHer3_Nrg" stoichiometry="1"/>
<speciesReference species="ipHer2" stoichiometry="1"/>
</listOfReactants>
<listOfProducts>
<speciesReference species="ipHer3_2_Nrg" stoichiometry="1"/>
</listOfProducts>
<kineticLaw>
<math xmlns="http://www.w3.org/1998/Math/MathML">
  <apply>
    <minus/>
    <apply>
      <times/>
      <ci> kf7 </ci>
      <ci> ipHer3_Nrg </ci>
      <ci> ipHer2 </ci>
    </apply>
    <apply>
      <times/>
      <ci> kr7 </ci>
      <ci> ipHer3_2_Nrg </ci>
    </apply>
  </apply>
</math>
</kineticLaw>
</reaction>
<reaction id="R135" metaid="metaid_0000296" reversible="false">
<listOfReactants>
<speciesReference species="ipHer3_Nrg" stoichiometry="1"/>
<speciesReference species="iHer2" stoichiometry="1"/>
</listOfReactants>
<listOfProducts>
<speciesReference species="ipHer3_2_Nrg" stoichiometry="1"/>
</listOfProducts>
<kineticLaw>
<math xmlns="http://www.w3.org/1998/Math/MathML">
  <apply>
    <times/>

```

```

    <ci> kf7 </ci>
    <ci> ipHer3_Nrg </ci>
    <ci> iHer2 </ci>
  </apply>
</math>
</kineticLaw>
</reaction>
<reaction id="R136" metaid="metaid_0000297" reversible="true">
<listOfReactants>
<speciesReference species="iHer3_Nrg" stoichiometry="1"/>
<speciesReference species="iEgfr" stoichiometry="1"/>
</listOfReactants>
<listOfProducts>
<speciesReference species="iHer3_1_Nrg" stoichiometry="1"/>
</listOfProducts>
<kineticLaw>
<math xmlns="http://www.w3.org/1998/Math/MathML">
  <apply>
    <minus/>
    <apply>
      <times/>
      <ci> kf10 </ci>
      <ci> iHer3_Nrg </ci>
      <ci> iEgfr </ci>
    </apply>
    <apply>
      <times/>
      <ci> kr7 </ci>
      <ci> iHer3_1_Nrg </ci>
    </apply>
  </apply>
</math>
</kineticLaw>
</reaction>
<reaction id="R137" metaid="metaid_0000298" reversible="true">
<listOfReactants>
<speciesReference species="ipHer3_Nrg" stoichiometry="1"/>
<speciesReference species="iEgfr" stoichiometry="1"/>
</listOfReactants>
<listOfProducts>
<speciesReference species="ipHer3_1_Nrg" stoichiometry="1"/>
</listOfProducts>
<kineticLaw>
<math xmlns="http://www.w3.org/1998/Math/MathML">
  <apply>
    <minus/>
    <apply>

```

```

    <times/>
    <ci> kf10 </ci>
    <ci> ipHer3_Nrg </ci>
    <ci> iEgfr </ci>
  </apply>
</apply>
  <times/>
  <ci> kr7 </ci>
  <ci> ipHer3_1_Nrg </ci>
</apply>
</math>
</kineticLaw>
</reaction>
<reaction id="R138" metaid="metaid_0000299" reversible="false">
<listOfReactants>
<speciesReference species="ipHer2" stoichiometry="1"/>
<speciesReference species="iHer2" stoichiometry="1"/>
</listOfReactants>
<listOfProducts>
<speciesReference species="ipHer2_2" stoichiometry="1"/>
</listOfProducts>
<kineticLaw>
<math xmlns="http://www.w3.org/1998/Math/MathML">
  <apply>
    <times/>
    <ci> kf12 </ci>
    <ci> ipHer2 </ci>
    <ci> iHer2 </ci>
  </apply>
</math>
</kineticLaw>
</reaction>
<reaction id="R139" metaid="metaid_0000300" reversible="true">
<listOfReactants>
<speciesReference species="ipHer2" stoichiometry="2"/>
</listOfReactants>
<listOfProducts>
<speciesReference species="ipHer2_2" stoichiometry="1"/>
</listOfProducts>
<kineticLaw>
<math xmlns="http://www.w3.org/1998/Math/MathML">
  <apply>
    <minus/>
    <apply>
      <times/>
      <ci> kf12 </ci>

```

```

    <ci> ipHer2 </ci>
    <ci> ipHer2 </ci>
  </apply>
  <apply>
    <times/>
    <ci> kr12 </ci>
    <ci> ipHer2_2 </ci>
  </apply>
</apply>
</math>
</kineticLaw>
</reaction>
<reaction id="R151" metaid="metaid_0000301" reversible="true">
  <listOfReactants>
    <speciesReference species="iHer3" stoichiometry="1"/>
    <speciesReference species="iHer2" stoichiometry="1"/>
  </listOfReactants>
  <listOfProducts>
    <speciesReference species="iHer3_2" stoichiometry="1"/>
  </listOfProducts>
  <kineticLaw>
    <math xmlns="http://www.w3.org/1998/Math/MathML">
      <apply>
        <minus/>
        <apply>
          <times/>
          <ci> kf12 </ci>
          <ci> iHer3 </ci>
          <ci> iHer2 </ci>
        </apply>
        <apply>
          <times/>
          <ci> kr12 </ci>
          <ci> iHer3_2 </ci>
        </apply>
      </apply>
    </math>
  </kineticLaw>
</reaction>
<reaction id="R152" metaid="metaid_0000302" reversible="true">
  <listOfReactants>
    <speciesReference species="iHer3" stoichiometry="1"/>
    <speciesReference species="iEgfr" stoichiometry="1"/>
  </listOfReactants>
  <listOfProducts>
    <speciesReference species="iHer3_1" stoichiometry="1"/>
  </listOfProducts>

```

```

<kineticLaw>
<math xmlns="http://www.w3.org/1998/Math/MathML">
  <apply>
    <minus/>
    <apply>
      <times/>
      <ci> kf12 </ci>
      <ci> iHer3 </ci>
      <ci> iEgfr </ci>
    </apply>
    <apply>
      <times/>
      <ci> kr12 </ci>
      <ci> iHer3_1 </ci>
    </apply>
  </apply>
</math>
</kineticLaw>
</reaction>
<reaction id="R153" metaid="metaid_0000303" reversible="true">
<listOfReactants>
<speciesReference species="iHer2" stoichiometry="1"/>
<speciesReference species="iEgfr" stoichiometry="1"/>
</listOfReactants>
<listOfProducts>
<speciesReference species="iHer2_1" stoichiometry="1"/>
</listOfProducts>
<kineticLaw>
<math xmlns="http://www.w3.org/1998/Math/MathML">
  <apply>
    <minus/>
    <apply>
      <times/>
      <ci> kf12 </ci>
      <ci> iHer2 </ci>
      <ci> iEgfr </ci>
    </apply>
    <apply>
      <times/>
      <ci> kr12 </ci>
      <ci> iHer2_1 </ci>
    </apply>
  </apply>
</math>
</kineticLaw>
</reaction>
<reaction id="R154" metaid="metaid_0000304" reversible="true">

```

```
<listOfReactants>
<speciesReference species="iEgfr" stoichiometry="2"/>
</listOfReactants>
<listOfProducts>
<speciesReference species="iEgfr_Egfr" stoichiometry="1"/>
</listOfProducts>
<kineticLaw>
<math xmlns="http://www.w3.org/1998/Math/MathML">
  <apply>
    <minus/>
    <apply>
      <times/>
      <ci> kf12 </ci>
      <ci> iEgfr </ci>
      <ci> iEgfr </ci>
    </apply>
    <apply>
      <times/>
      <ci> kr12 </ci>
      <ci> iEgfr_Egfr </ci>
    </apply>
  </apply>
</math>
</kineticLaw>
</reaction>
<reaction id="R155" metaid="metaid_0000305" reversible="true">
<listOfReactants>
<speciesReference species="iHer2" stoichiometry="2"/>
</listOfReactants>
<listOfProducts>
<speciesReference species="iHer2_2" stoichiometry="1"/>
</listOfProducts>
<kineticLaw>
<math xmlns="http://www.w3.org/1998/Math/MathML">
  <apply>
    <minus/>
    <apply>
      <times/>
      <ci> kf12 </ci>
      <ci> iHer2 </ci>
      <ci> iHer2 </ci>
    </apply>
    <apply>
      <times/>
      <ci> kr12 </ci>
      <ci> iHer2_2 </ci>
    </apply>
  </math>
</kineticLaw>
</reaction>
```



```

</apply>
</math>
</kineticLaw>
</reaction>
<reaction id="R156" metaid="metaid_0000306" reversible="false">
<listOfReactants>
<speciesReference species="iHer3_2_Nrg" stoichiometry="1"/>
</listOfReactants>
<listOfProducts>
<speciesReference species="ipHer3_2_Nrg" stoichiometry="1"/>
</listOfProducts>
<kineticLaw>
<math xmlns="http://www.w3.org/1998/Math/MathML">
<apply>
<times/>
<ci> kf30 </ci>
<ci> iHer3_2_Nrg </ci>
</apply>
</math>
</kineticLaw>
</reaction>
<reaction id="R157" metaid="metaid_0000307" reversible="false">
<listOfReactants>
<speciesReference species="iHer3_1_Nrg" stoichiometry="1"/>
</listOfReactants>
<listOfProducts>
<speciesReference species="ipHer3_1_Nrg" stoichiometry="1"/>
</listOfProducts>
<kineticLaw>
<math xmlns="http://www.w3.org/1998/Math/MathML">
<apply>
<times/>
<ci> kf30 </ci>
<ci> iHer3_1_Nrg </ci>
</apply>
</math>
</kineticLaw>
</reaction>
<reaction id="R162" metaid="metaid_0000308" reversible="false">
<listOfReactants>
<speciesReference species="ipHer3_Nrg" stoichiometry="1"/>
</listOfReactants>
<listOfProducts>
<speciesReference species="iHer3" stoichiometry="1"/>
<speciesReference species="iNrg" stoichiometry="1"/>
</listOfProducts>
<kineticLaw>

```

```
<math xmlns="http://www.w3.org/1998/Math/MathML">
  <apply>
    <times/>
    <ci> kr1 </ci>
    <ci> ipHer3_Nrg </ci>
  </apply>
</math>
</kineticLaw>
</reaction>
<reaction id="R164" metaid="metaid_0000309" reversible="true">
<listOfReactants>
<speciesReference species="ipHer3_2_Nrg" stoichiometry="1"/>
<speciesReference species="phtase" stoichiometry="1"/>
</listOfReactants>
<listOfProducts>
<speciesReference species="ipHer3_2_Nrg_phtase" stoichiometry="1"/>
</listOfProducts>
<kineticLaw>
<math xmlns="http://www.w3.org/1998/Math/MathML">
  <apply>
    <minus/>
    <apply>
      <times/>
      <ci> kf38 </ci>
      <ci> ipHer3_2_Nrg </ci>
      <ci> phtase </ci>
    </apply>
    <apply>
      <times/>
      <ci> kr38 </ci>
      <ci> ipHer3_2_Nrg_phtase </ci>
    </apply>
  </apply>
</math>
</kineticLaw>
</reaction>
<reaction id="R165" metaid="metaid_0000310" reversible="true">
<listOfReactants>
<speciesReference species="ipHer3_1_Nrg" stoichiometry="1"/>
<speciesReference species="phtase" stoichiometry="1"/>
</listOfReactants>
<listOfProducts>
<speciesReference species="ipHer3_1_Nrg_phtase" stoichiometry="1"/>
</listOfProducts>
<kineticLaw>
<math xmlns="http://www.w3.org/1998/Math/MathML">
  <apply>
```

```

<minus/>
<apply>
  <times/>
  <ci> kf38 </ci>
  <ci> ipHer3_1_Nrg </ci>
  <ci> phtase </ci>
</apply>
<apply>
  <times/>
  <ci> kr38 </ci>
  <ci> ipHer3_1_Nrg_phtase </ci>
</apply>
</apply>
</math>
</kineticLaw>
</reaction>
<reaction id="R166" metaid="metaid_0000311" reversible="true">
<listOfReactants>
<speciesReference species="ipHer2_2" stoichiometry="1"/>
<speciesReference species="phtase" stoichiometry="1"/>
</listOfReactants>
<listOfProducts>
<speciesReference species="ipHer2_2_phtase" stoichiometry="1"/>
</listOfProducts>
<kineticLaw>
<math xmlns="http://www.w3.org/1998/Math/MathML">
  <apply>
    <minus/>
    <apply>
      <times/>
      <ci> kf38 </ci>
      <ci> ipHer2_2 </ci>
      <ci> phtase </ci>
    </apply>
    <apply>
      <times/>
      <ci> kr38 </ci>
      <ci> ipHer2_2_phtase </ci>
    </apply>
  </apply>
</math>
</kineticLaw>
</reaction>
<reaction id="R171" metaid="metaid_0000312" reversible="false">
<listOfReactants>
<speciesReference species="ipHer3_2_Nrg_phtase" stoichiometry="1"/>
</listOfReactants>

```

```
<listOfProducts>
<speciesReference species="iHer3_2_Nrg" stoichiometry="1"/>
<speciesReference species="phtase" stoichiometry="1"/>
</listOfProducts>
<kineticLaw>
<math xmlns="http://www.w3.org/1998/Math/MathML">
  <apply>
    <times/>
    <ci> kf45 </ci>
    <ci> ipHer3_2_Nrg_phtase </ci>
  </apply>
</math>
</kineticLaw>
</reaction>
<reaction id="R172" metaid="metaid_0000313" reversible="false">
<listOfReactants>
<speciesReference species="ipHer3_1_Nrg_phtase" stoichiometry="1"/>
</listOfReactants>
<listOfProducts>
<speciesReference species="iHer3_1_Nrg" stoichiometry="1"/>
<speciesReference species="phtase" stoichiometry="1"/>
</listOfProducts>
<kineticLaw>
<math xmlns="http://www.w3.org/1998/Math/MathML">
  <apply>
    <times/>
    <ci> kf45 </ci>
    <ci> ipHer3_1_Nrg_phtase </ci>
  </apply>
</math>
</kineticLaw>
</reaction>
<reaction id="R173" metaid="metaid_0000314" reversible="false">
<listOfReactants>
<speciesReference species="ipHer2_2_phtase" stoichiometry="1"/>
</listOfReactants>
<listOfProducts>
<speciesReference species="iHer2_2" stoichiometry="1"/>
<speciesReference species="phtase" stoichiometry="1"/>
</listOfProducts>
<kineticLaw>
<math xmlns="http://www.w3.org/1998/Math/MathML">
  <apply>
    <times/>
    <ci> kf45 </ci>
    <ci> ipHer2_2_phtase </ci>
  </apply>
</math>
</kineticLaw>
</reaction>
```

```
</math>
</kineticLaw>
</reaction>
<reaction id="R178" metaid="metaid_0000315" reversible="true">
<listOfReactants>
<speciesReference species="ipHer3_2_Nrg" stoichiometry="1"/>
<speciesReference species="Pi3k" stoichiometry="1"/>
</listOfReactants>
<listOfProducts>
<speciesReference species="ipHer3_2_Nrg_Pi3k" stoichiometry="1"/>
</listOfProducts>
<kineticLaw>
<math xmlns="http://www.w3.org/1998/Math/MathML">
<apply>
<minus/>
<apply>
<times/>
<ci> kf52 </ci>
<ci> ipHer3_2_Nrg </ci>
<ci> Pi3k </ci>
</apply>
<apply>
<times/>
<ci> kr52 </ci>
<ci> ipHer3_2_Nrg_Pi3k </ci>
</apply>
</apply>
</math>
</kineticLaw>
</reaction>
<reaction id="R179" metaid="metaid_0000316" reversible="true">
<listOfReactants>
<speciesReference species="ipHer3_1_Nrg" stoichiometry="1"/>
<speciesReference species="Pi3k" stoichiometry="1"/>
</listOfReactants>
<listOfProducts>
<speciesReference species="ipHer3_1_Nrg_Pi3k" stoichiometry="1"/>
</listOfProducts>
<kineticLaw>
<math xmlns="http://www.w3.org/1998/Math/MathML">
<apply>
<minus/>
<apply>
<times/>
<ci> kf52 </ci>
<ci> ipHer3_1_Nrg </ci>
<ci> Pi3k </ci>
```

```

</apply>
<apply>
  <times/>
  <ci> kr52 </ci>
  <ci> ipHer3_1_Nrg_Pi3k </ci>
</apply>
</apply>
</math>
</kineticLaw>
</reaction>
<reaction id="R180" metaid="metaid_0000317" reversible="true">
<listOfReactants>
<speciesReference species="ipHer2_2" stoichiometry="1"/>
<speciesReference species="Pi3k" stoichiometry="1"/>
</listOfReactants>
<listOfProducts>
<speciesReference species="ipHer2_2_Pi3k" stoichiometry="1"/>
</listOfProducts>
<kineticLaw>
<math xmlns="http://www.w3.org/1998/Math/MathML">
  <apply>
    <minus/>
    <apply>
      <times/>
      <ci> kf54 </ci>
      <ci> ipHer2_2 </ci>
      <ci> Pi3k </ci>
    </apply>
    <apply>
      <times/>
      <ci> kr54 </ci>
      <ci> ipHer2_2_Pi3k </ci>
    </apply>
  </apply>
</math>
</kineticLaw>
</reaction>
<reaction id="R185" metaid="metaid_0000318" reversible="false">
<listOfReactants>
<speciesReference species="iNrg" stoichiometry="1"/>
</listOfReactants>
<listOfProducts>
<speciesReference species="dNrg" stoichiometry="1"/>
</listOfProducts>
<kineticLaw>
<math xmlns="http://www.w3.org/1998/Math/MathML">
  <apply>

```

```
</times/>
<ci> kf185 </ci>
<ci> iNrg </ci>
</apply>
</math>
</kineticLaw>
</reaction>
<reaction id="R187" metaid="metaid_0000319" reversible="false">
<listOfReactants>
<speciesReference species="iHer3_Nrg" stoichiometry="1"/>
</listOfReactants>
<listOfProducts>
<speciesReference species="dHer3_Nrg" stoichiometry="1"/>
</listOfProducts>
<kineticLaw>
<math xmlns="http://www.w3.org/1998/Math/MathML">
<apply>
<times/>
<ci> kf187 </ci>
<ci> iHer3_Nrg </ci>
</apply>
</math>
</kineticLaw>
</reaction>
<reaction id="R189" metaid="metaid_0000320" reversible="false">
<listOfReactants>
<speciesReference species="ipHer3_Nrg" stoichiometry="1"/>
</listOfReactants>
<listOfProducts>
<speciesReference species="dpHer3_Nrg" stoichiometry="1"/>
</listOfProducts>
<kineticLaw>
<math xmlns="http://www.w3.org/1998/Math/MathML">
<apply>
<times/>
<ci> kf187 </ci>
<ci> ipHer3_Nrg </ci>
</apply>
</math>
</kineticLaw>
</reaction>
<reaction id="R191" metaid="metaid_0000321" reversible="false">
<listOfReactants>
<speciesReference species="ipHer2" stoichiometry="1"/>
</listOfReactants>
<listOfProducts>
<speciesReference species="dpHer2" stoichiometry="1"/>
```

```
</listOfProducts>
<kineticLaw>
<math xmlns="http://www.w3.org/1998/Math/MathML">
  <apply>
    <times/>
    <ci> kf187 </ci>
    <ci> ipHer2 </ci>
  </apply>
</math>
</kineticLaw>
</reaction>
<reaction id="R192" metaid="metaid_0000322" reversible="false">
<listOfReactants>
<speciesReference species="iHer3_2_Nrg" stoichiometry="1"/>
</listOfReactants>
<listOfProducts>
<speciesReference species="dHer3_2_Nrg" stoichiometry="1"/>
</listOfProducts>
<kineticLaw>
<math xmlns="http://www.w3.org/1998/Math/MathML">
  <apply>
    <times/>
    <ci> kf192 </ci>
    <ci> iHer3_2_Nrg </ci>
  </apply>
</math>
</kineticLaw>
</reaction>
<reaction id="R193" metaid="metaid_0000323" reversible="false">
<listOfReactants>
<speciesReference species="ipHer3_2_Nrg" stoichiometry="1"/>
</listOfReactants>
<listOfProducts>
<speciesReference species="dpHer3_2_Nrg" stoichiometry="1"/>
</listOfProducts>
<kineticLaw>
<math xmlns="http://www.w3.org/1998/Math/MathML">
  <apply>
    <times/>
    <ci> kf192 </ci>
    <ci> ipHer3_2_Nrg </ci>
  </apply>
</math>
</kineticLaw>
</reaction>
<reaction id="R194" metaid="metaid_0000324" reversible="false">
<listOfReactants>
```



```
<speciesReference species="ipHer3_2_Nrg_phtase" stoichiometry="1"/>
</listOfReactants>
<listOfProducts>
<speciesReference species="dpHer3_2_Nrg_phtase" stoichiometry="1"/>
</listOfProducts>
<kineticLaw>
<math xmlns="http://www.w3.org/1998/Math/MathML">
  <apply>
    <times/>
    <ci> kf192 </ci>
    <ci> ipHer3_2_Nrg_phtase </ci>
  </apply>
</math>
</kineticLaw>
</reaction>
<reaction id="R195" metaid="metaid_0000325" reversible="false">
<listOfReactants>
<speciesReference species="ipHer3_2_Nrg_Pi3k" stoichiometry="1"/>
</listOfReactants>
<listOfProducts>
<speciesReference species="dpHer3_2_Nrg_Pi3k" stoichiometry="1"/>
</listOfProducts>
<kineticLaw>
<math xmlns="http://www.w3.org/1998/Math/MathML">
  <apply>
    <times/>
    <ci> kf192 </ci>
    <ci> ipHer3_2_Nrg_Pi3k </ci>
  </apply>
</math>
</kineticLaw>
</reaction>
<reaction id="R196" metaid="metaid_0000326" reversible="false">
<listOfReactants>
<speciesReference species="ipHer3_2_Nrg_Pi3k_Pip2" stoichiometry="1"/>
</listOfReactants>
<listOfProducts>
<speciesReference species="dpHer3_2_Nrg_Pi3k_Pip2" stoichiometry="1"/>
</listOfProducts>
<kineticLaw>
<math xmlns="http://www.w3.org/1998/Math/MathML">
  <apply>
    <times/>
    <ci> kf192 </ci>
    <ci> ipHer3_2_Nrg_Pi3k_Pip2 </ci>
  </apply>
</math>
```

```
</kineticLaw>
</reaction>
<reaction id="R197" metaid="metaid_0000327" reversible="false">
<listOfReactants>
<speciesReference species="ipHer2_2" stoichiometry="1"/>
</listOfReactants>
<listOfProducts>
<speciesReference species="dpHer2_2" stoichiometry="1"/>
</listOfProducts>
<kineticLaw>
<math xmlns="http://www.w3.org/1998/Math/MathML">
  <apply>
    <times/>
    <ci> kf192 </ci>
    <ci> ipHer2_2 </ci>
  </apply>
</math>
</kineticLaw>
</reaction>
<reaction id="R198" metaid="metaid_0000328" reversible="false">
<listOfReactants>
<speciesReference species="ipHer2_2_phtase" stoichiometry="1"/>
</listOfReactants>
<listOfProducts>
<speciesReference species="dpHer2_2_phtase" stoichiometry="1"/>
</listOfProducts>
<kineticLaw>
<math xmlns="http://www.w3.org/1998/Math/MathML">
  <apply>
    <times/>
    <ci> kf192 </ci>
    <ci> ipHer2_2_phtase </ci>
  </apply>
</math>
</kineticLaw>
</reaction>
<reaction id="R199" metaid="metaid_0000329" reversible="false">
<listOfReactants>
<speciesReference species="ipHer2_2_Pi3k" stoichiometry="1"/>
</listOfReactants>
<listOfProducts>
<speciesReference species="dpHer2_2_Pi3k" stoichiometry="1"/>
</listOfProducts>
<kineticLaw>
<math xmlns="http://www.w3.org/1998/Math/MathML">
  <apply>
    <times/>
```

```

    <ci> kf192 </ci>
    <ci> ipHer2_2_Pi3k </ci>
  </apply>
</math>
</kineticLaw>
</reaction>
<reaction id="R200" metaid="metaid_0000330" reversible="false">
<listOfReactants>
<speciesReference species="ipHer2_2_Pi3k_Pip2" stoichiometry="1"/>
</listOfReactants>
<listOfProducts>
<speciesReference species="dpHer2_2_Pi3k_Pip2" stoichiometry="1"/>
</listOfProducts>
<kineticLaw>
<math xmlns="http://www.w3.org/1998/Math/MathML">
  <apply>
    <times/>
    <ci> kf192 </ci>
    <ci> ipHer2_2_Pi3k_Pip2 </ci>
  </apply>
</math>
</kineticLaw>
</reaction>
<reaction id="R201" metaid="metaid_0000331" reversible="false">
<listOfReactants>
<speciesReference species="iHer3_1_Nrg" stoichiometry="1"/>
</listOfReactants>
<listOfProducts>
<speciesReference species="dHer3_1_Nrg" stoichiometry="1"/>
</listOfProducts>
<kineticLaw>
<math xmlns="http://www.w3.org/1998/Math/MathML">
  <apply>
    <times/>
    <ci> kf201 </ci>
    <ci> iHer3_1_Nrg </ci>
  </apply>
</math>
</kineticLaw>
</reaction>
<reaction id="R202" metaid="metaid_0000332" reversible="false">
<listOfReactants>
<speciesReference species="ipHer3_1_Nrg" stoichiometry="1"/>
</listOfReactants>
<listOfProducts>
<speciesReference species="dpHer3_1_Nrg" stoichiometry="1"/>
</listOfProducts>

```

```
<kineticLaw>
<math xmlns="http://www.w3.org/1998/Math/MathML">
  <apply>
    <times/>
    <ci> kf201 </ci>
    <ci> ipHer3_1_Nrg </ci>
  </apply>
</math>
</kineticLaw>
</reaction>
<reaction id="R203" metaid="metaid_0000333" reversible="false">
<listOfReactants>
<speciesReference species="ipHer3_1_Nrg_phtase" stoichiometry="1"/>
</listOfReactants>
<listOfProducts>
<speciesReference species="dpHer3_1_Nrg_phtase" stoichiometry="1"/>
</listOfProducts>
<kineticLaw>
<math xmlns="http://www.w3.org/1998/Math/MathML">
  <apply>
    <times/>
    <ci> kf201 </ci>
    <ci> ipHer3_1_Nrg_phtase </ci>
  </apply>
</math>
</kineticLaw>
</reaction>
<reaction id="R204" metaid="metaid_0000334" reversible="false">
<listOfReactants>
<speciesReference species="ipHer3_1_Nrg_Pi3k" stoichiometry="1"/>
</listOfReactants>
<listOfProducts>
<speciesReference species="dpHer3_1_Nrg_Pi3k" stoichiometry="1"/>
</listOfProducts>
<kineticLaw>
<math xmlns="http://www.w3.org/1998/Math/MathML">
  <apply>
    <times/>
    <ci> kf201 </ci>
    <ci> ipHer3_1_Nrg_Pi3k </ci>
  </apply>
</math>
</kineticLaw>
</reaction>
<reaction id="R205" metaid="metaid_0000335" reversible="false">
<listOfReactants>
<speciesReference species="ipHer3_1_Nrg_Pi3k_Pip2" stoichiometry="1"/>
```

```

</listOfReactants>
<listOfProducts>
<speciesReference species="dpHer3_1_Nrg_Pi3k_Pip2" stoichiometry="1"/>
</listOfProducts>
<kineticLaw>
<math xmlns="http://www.w3.org/1998/Math/MathML">
  <apply>
    <times/>
    <ci> kf201 </ci>
    <ci> ipHer3_1_Nrg_Pi3k_Pip2 </ci>
  </apply>
</math>
</kineticLaw>
</reaction>
<reaction id="R206" metaid="metaid_0000354" reversible="true">
<listOfReactants>
<speciesReference species="Her3" stoichiometry="2"/>
</listOfReactants>
<listOfProducts>
<speciesReference species="Her3_3" stoichiometry="1"/>
</listOfProducts>
<kineticLaw>
<math xmlns="http://www.w3.org/1998/Math/MathML">
  <apply>
    <minus/>
    <apply>
      <times/>
      <ci> kf12 </ci>
      <ci> Her3 </ci>
      <ci> Her3 </ci>
    </apply>
    <apply>
      <times/>
      <ci> kr12 </ci>
      <ci> Her3_3 </ci>
    </apply>
  </apply>
</math>
</kineticLaw>
</reaction>
<reaction id="R207" metaid="metaid_0000355" reversible="true">
<listOfReactants>
<speciesReference species="Her3_3" stoichiometry="1"/>
<speciesReference species="Nrg" stoichiometry="1"/>
</listOfReactants>
<listOfProducts>
<speciesReference species="Her3_3_Nrg" stoichiometry="1"/>

```

```

</listOfProducts>
<kineticLaw>
<math xmlns="http://www.w3.org/1998/Math/MathML">
  <apply>
    <minus/>
    <apply>
      <times/>
      <ci> kf1 </ci>
      <ci> Nrg </ci>
      <ci> Her3_3 </ci>
    </apply>
    <apply>
      <times/>
      <ci> kr1 </ci>
      <ci> Her3_3_Nrg </ci>
    </apply>
  </apply>
</math>
</kineticLaw>
</reaction>
<reaction id="R208" metaid="metaid_0000356" reversible="true">
<listOfReactants>
<speciesReference species="Her3_Nrg" stoichiometry="1"/>
<speciesReference species="Her3" stoichiometry="1"/>
</listOfReactants>
<listOfProducts>
<speciesReference species="Her3_3_Nrg" stoichiometry="1"/>
</listOfProducts>
<kineticLaw>
<math xmlns="http://www.w3.org/1998/Math/MathML">
  <apply>
    <minus/>
    <apply>
      <times/>
      <ci> kf7 </ci>
      <ci> Her3_Nrg </ci>
      <ci> Her3 </ci>
    </apply>
    <apply>
      <times/>
      <ci> kr7 </ci>
      <ci> Her3_3_Nrg </ci>
    </apply>
  </apply>
</math>
</kineticLaw>
</reaction>

```

```

<reaction id="R209" metaid="metaid_0000357" reversible="false">
<listOfReactants>
<speciesReference species="Her3_3_Nrg" stoichiometry="1"/>
</listOfReactants>
<listOfProducts>
<speciesReference species="pHer3_3_Nrg" stoichiometry="1"/>
</listOfProducts>
<kineticLaw>
<math xmlns="http://www.w3.org/1998/Math/MathML">
  <apply>
    <times/>
    <ci> kf30_weak </ci>
    <ci> Her3_3_Nrg </ci>
  </apply>
</math>
</kineticLaw>
</reaction>
<reaction id="R210" metaid="metaid_0000358" reversible="true">
<listOfReactants>
<speciesReference species="pHer3_3_Nrg" stoichiometry="1"/>
<speciesReference species="phtase" stoichiometry="1"/>
</listOfReactants>
<listOfProducts>
<speciesReference species="pHer3_3_Nrg_phtase" stoichiometry="1"/>
</listOfProducts>
<kineticLaw>
<math xmlns="http://www.w3.org/1998/Math/MathML">
  <apply>
    <minus/>
    <apply>
      <times/>
      <ci> kf38 </ci>
      <ci> pHer3_3_Nrg </ci>
      <ci> phtase </ci>
    </apply>
    <apply>
      <times/>
      <ci> kr38 </ci>
      <ci> pHer3_3_Nrg_phtase </ci>
    </apply>
  </apply>
</math>
</kineticLaw>
</reaction>
<reaction id="R211" metaid="metaid_0000359" reversible="false">
<listOfReactants>
<speciesReference species="pHer3_3_Nrg_phtase" stoichiometry="1"/>

```

```

</listOfReactants>
<listOfProducts>
<speciesReference species="Her3_3_Nrg" stoichiometry="1"/>
<speciesReference species="phtase" stoichiometry="1"/>
</listOfProducts>
<kineticLaw>
<math xmlns="http://www.w3.org/1998/Math/MathML">
  <apply>
    <times/>
    <ci> kf45 </ci>
    <ci> pHer3_3_Nrg_phtase </ci>
  </apply>
</math>
</kineticLaw>
</reaction>
<reaction id="R212" metaid="metaid_0000360" reversible="true">
<listOfReactants>
<speciesReference species="pHer3_3_Nrg" stoichiometry="1"/>
<speciesReference species="Pi3k" stoichiometry="1"/>
</listOfReactants>
<listOfProducts>
<speciesReference species="pHer3_3_Nrg_Pi3k" stoichiometry="1"/>
</listOfProducts>
<kineticLaw>
<math xmlns="http://www.w3.org/1998/Math/MathML">
  <apply>
    <minus/>
    <apply>
      <times/>
      <ci> kf52 </ci>
      <ci> pHer3_3_Nrg </ci>
      <ci> Pi3k </ci>
    </apply>
    <apply>
      <times/>
      <ci> kr52 </ci>
      <ci> pHer3_3_Nrg_Pi3k </ci>
    </apply>
  </apply>
</math>
</kineticLaw>
</reaction>
<reaction id="R213" metaid="metaid_0000361" reversible="true">
<listOfReactants>
<speciesReference species="pHer3_3_Nrg_Pi3k" stoichiometry="1"/>
<speciesReference species="Pip2" stoichiometry="1"/>
</listOfReactants>

```



```

<listOfProducts>
<speciesReference species="pHer3_3_Nrg_Pi3k_Pip2" stoichiometry="1"/>
</listOfProducts>
<kineticLaw>
<math xmlns="http://www.w3.org/1998/Math/MathML">
  <apply>
    <minus/>
    <apply>
      <times/>
      <ci> kf59 </ci>
      <ci> pHer3_3_Nrg_Pi3k </ci>
      <ci> Pip2 </ci>
    </apply>
    <apply>
      <times/>
      <ci> kr59 </ci>
      <ci> pHer3_3_Nrg_Pi3k_Pip2 </ci>
    </apply>
  </apply>
</math>
</kineticLaw>
</reaction>
<reaction id="R214" metaid="metaid_0000362" reversible="false">
<listOfReactants>
<speciesReference species="pHer3_3_Nrg_Pi3k_Pip2" stoichiometry="1"/>
</listOfReactants>
<listOfProducts>
<speciesReference species="pHer3_3_Nrg_Pi3k" stoichiometry="1"/>
<speciesReference species="Pip3" stoichiometry="1"/>
</listOfProducts>
<kineticLaw>
<math xmlns="http://www.w3.org/1998/Math/MathML">
  <apply>
    <times/>
    <ci> kf66 </ci>
    <ci> pHer3_3_Nrg_Pi3k_Pip2 </ci>
  </apply>
</math>
</kineticLaw>
</reaction>
<reaction id="R215" metaid="metaid_0000363" reversible="true">
<listOfReactants>
<speciesReference species="pHer3_Nrg" stoichiometry="1"/>
<speciesReference species="Her3" stoichiometry="1"/>
</listOfReactants>
<listOfProducts>
<speciesReference species="pHer3_3_Nrg" stoichiometry="1"/>

```

```
</listOfProducts>
<kineticLaw>
<math xmlns="http://www.w3.org/1998/Math/MathML">
  <apply>
    <minus/>
    <apply>
      <times/>
      <ci> kf10_weak </ci>
      <ci> pHer3_Nrg </ci>
      <ci> Her3 </ci>
    </apply>
    <apply>
      <times/>
      <ci> kr7 </ci>
      <ci> pHer3_3_Nrg </ci>
    </apply>
  </apply>
</math>
</kineticLaw>
</reaction>
<reaction id="R216" metaid="metaid_0000364" reversible="true">
<listOfReactants>
<speciesReference species="Her3_3_Nrg" stoichiometry="1"/>
</listOfReactants>
<listOfProducts>
<speciesReference species="iHer3_3_Nrg" stoichiometry="1"/>
</listOfProducts>
<kineticLaw>
<math xmlns="http://www.w3.org/1998/Math/MathML">
  <apply>
    <minus/>
    <apply>
      <times/>
      <ci> kf93 </ci>
      <ci> Her3_3_Nrg </ci>
    </apply>
    <apply>
      <times/>
      <ci> kr93 </ci>
      <ci> iHer3_3_Nrg </ci>
    </apply>
  </apply>
</math>
</kineticLaw>
</reaction>
<reaction id="R217" metaid="metaid_0000365" reversible="true">
<listOfReactants>
```

```
<speciesReference species="pHer3_3_Nrg" stoichiometry="1"/>
</listOfReactants>
<listOfProducts>
<speciesReference species="ipHer3_3_Nrg" stoichiometry="1"/>
</listOfProducts>
<kineticLaw>
<math xmlns="http://www.w3.org/1998/Math/MathML">
  <apply>
    <minus/>
    <apply>
      <times/>
      <ci> kf93 </ci>
      <ci> pHer3_3_Nrg </ci>
    </apply>
    <apply>
      <times/>
      <ci> kr93 </ci>
      <ci> ipHer3_3_Nrg </ci>
    </apply>
  </apply>
</math>
</kineticLaw>
</reaction>
<reaction id="R218" metaid="metaid_0000366" reversible="true">
<listOfReactants>
<speciesReference species="pHer3_3_Nrg_phtase" stoichiometry="1"/>
</listOfReactants>
<listOfProducts>
<speciesReference species="ipHer3_3_Nrg_phtase" stoichiometry="1"/>
</listOfProducts>
<kineticLaw>
<math xmlns="http://www.w3.org/1998/Math/MathML">
  <apply>
    <minus/>
    <apply>
      <times/>
      <ci> kf93 </ci>
      <ci> pHer3_3_Nrg_phtase </ci>
    </apply>
    <apply>
      <times/>
      <ci> kr93 </ci>
      <ci> ipHer3_3_Nrg_phtase </ci>
    </apply>
  </apply>
</math>
</kineticLaw>
```

```

</reaction>
<reaction id="R219" metaid="metaid_0000367" reversible="true">
<listOfReactants>
<speciesReference species="pHer3_3_Nrg_Pi3k" stoichiometry="1"/>
</listOfReactants>
<listOfProducts>
<speciesReference species="ipHer3_3_Nrg_Pi3k" stoichiometry="1"/>
</listOfProducts>
<kineticLaw>
<math xmlns="http://www.w3.org/1998/Math/MathML">
<apply>
<minus/>
<apply>
<times/>
<ci> kf93 </ci>
<ci> pHer3_3_Nrg_Pi3k </ci>
</apply>
<apply>
<times/>
<ci> kr93 </ci>
<ci> ipHer3_3_Nrg_Pi3k </ci>
</apply>
</apply>
</math>
</kineticLaw>
</reaction>
<reaction id="R220" metaid="metaid_0000368" reversible="true">
<listOfReactants>
<speciesReference species="pHer3_3_Nrg_Pi3k_Pip2" stoichiometry="1"/>
</listOfReactants>
<listOfProducts>
<speciesReference species="ipHer3_3_Nrg_Pi3k_Pip2" stoichiometry="1"/>
</listOfProducts>
<kineticLaw>
<math xmlns="http://www.w3.org/1998/Math/MathML">
<apply>
<minus/>
<apply>
<times/>
<ci> kf93 </ci>
<ci> pHer3_3_Nrg_Pi3k_Pip2 </ci>
</apply>
<apply>
<times/>
<ci> kr93 </ci>
<ci> ipHer3_3_Nrg_Pi3k_Pip2 </ci>
</apply>
</math>
</kineticLaw>

```

```
</apply>
</math>
</kineticLaw>
</reaction>
<reaction id="R221" metaid="metaid_0000369" reversible="false">
<listOfReactants>
<speciesReference species="iHer3_3_Nrg" stoichiometry="1"/>
</listOfReactants>
<listOfProducts>
<speciesReference species="dHer3_3_Nrg" stoichiometry="1"/>
</listOfProducts>
<kineticLaw>
<math xmlns="http://www.w3.org/1998/Math/MathML">
<apply>
<times/>
<ci> kf192 </ci>
<ci> iHer3_3_Nrg </ci>
</apply>
</math>
</kineticLaw>
</reaction>
<reaction id="R222" metaid="metaid_0000370" reversible="false">
<listOfReactants>
<speciesReference species="ipHer3_3_Nrg" stoichiometry="1"/>
</listOfReactants>
<listOfProducts>
<speciesReference species="dpHer3_3_Nrg" stoichiometry="1"/>
</listOfProducts>
<kineticLaw>
<math xmlns="http://www.w3.org/1998/Math/MathML">
<apply>
<times/>
<ci> kf192 </ci>
<ci> ipHer3_3_Nrg </ci>
</apply>
</math>
</kineticLaw>
</reaction>
<reaction id="R223" metaid="metaid_0000371" reversible="false">
<listOfReactants>
<speciesReference species="ipHer3_3_Nrg_phtase" stoichiometry="1"/>
</listOfReactants>
<listOfProducts>
<speciesReference species="dpHer3_3_Nrg_phtase" stoichiometry="1"/>
</listOfProducts>
<kineticLaw>
<math xmlns="http://www.w3.org/1998/Math/MathML">
```

```
<apply>
  <times/>
  <ci> kf192 </ci>
  <ci> ipHer3_3_Nrg_phtase </ci>
</apply>
</math>
</kineticLaw>
</reaction>
<reaction id="R224" metaid="metaid_0000372" reversible="false">
<listOfReactants>
<speciesReference species="ipHer3_3_Nrg_Pi3k" stoichiometry="1"/>
</listOfReactants>
<listOfProducts>
<speciesReference species="dpHer3_3_Nrg_Pi3k" stoichiometry="1"/>
</listOfProducts>
<kineticLaw>
<math xmlns="http://www.w3.org/1998/Math/MathML">
  <apply>
    <times/>
    <ci> kf192 </ci>
    <ci> ipHer3_3_Nrg_Pi3k </ci>
  </apply>
</math>
</kineticLaw>
</reaction>
<reaction id="R225" metaid="metaid_0000373" reversible="false">
<listOfReactants>
<speciesReference species="ipHer3_3_Nrg_Pi3k_Pip2" stoichiometry="1"/>
</listOfReactants>
<listOfProducts>
<speciesReference species="dpHer3_3_Nrg_Pi3k_Pip2" stoichiometry="1"/>
</listOfProducts>
<kineticLaw>
<math xmlns="http://www.w3.org/1998/Math/MathML">
  <apply>
    <times/>
    <ci> kf192 </ci>
    <ci> ipHer3_3_Nrg_Pi3k_Pip2 </ci>
  </apply>
</math>
</kineticLaw>
</reaction>
<reaction id="R300" metaid="metaid_0000487" reversible="true">
<listOfReactants>
<speciesReference species="Nrg" stoichiometry="1"/>
<speciesReference species="Her4" stoichiometry="1"/>
</listOfReactants>
```

```
<listOfProducts>
<speciesReference species="Her4_Nrg" stoichiometry="1"/>
</listOfProducts>
<kineticLaw>
<math xmlns="http://www.w3.org/1998/Math/MathML">
  <apply>
    <minus/>
    <apply>
      <times/>
      <ci> kf1 </ci>
      <ci> Nrg </ci>
      <ci> Her4 </ci>
    </apply>
    <apply>
      <times/>
      <ci> kr1 </ci>
      <ci> Her4_Nrg </ci>
    </apply>
  </apply>
</math>
</kineticLaw>
</reaction>
<reaction id="R301" metaid="metaid_0000488" reversible="true">
<listOfReactants>
<speciesReference species="Nrg" stoichiometry="1"/>
<speciesReference species="Her4_2" stoichiometry="1"/>
</listOfReactants>
<listOfProducts>
<speciesReference species="Her4_2_Nrg" stoichiometry="1"/>
</listOfProducts>
<kineticLaw>
<math xmlns="http://www.w3.org/1998/Math/MathML">
  <apply>
    <minus/>
    <apply>
      <times/>
      <ci> kf2 </ci>
      <ci> Nrg </ci>
      <ci> Her4_2 </ci>
    </apply>
    <apply>
      <times/>
      <ci> kr2 </ci>
      <ci> Her4_2_Nrg </ci>
    </apply>
  </apply>
</math>
```

```

</kineticLaw>
</reaction>
<reaction id="R302" metaid="metaid_0000489" reversible="true">
<listOfReactants>
<speciesReference species="Her4_Nrg" stoichiometry="1"/>
<speciesReference species="Her2" stoichiometry="1"/>
</listOfReactants>
<listOfProducts>
<speciesReference species="Her4_2_Nrg" stoichiometry="1"/>
</listOfProducts>
<kineticLaw>
<math xmlns="http://www.w3.org/1998/Math/MathML">
  <apply>
    <minus/>
    <apply>
      <times/>
      <ci> kf7 </ci>
      <ci> Her4_Nrg </ci>
      <ci> Her2 </ci>
    </apply>
    <apply>
      <times/>
      <ci> kr7 </ci>
      <ci> Her4_2_Nrg </ci>
    </apply>
  </apply>
</math>
</kineticLaw>
</reaction>
<reaction id="R303" metaid="metaid_0000490" reversible="true">
<listOfReactants>
<speciesReference species="pHer4_Nrg" stoichiometry="1"/>
<speciesReference species="pHer2" stoichiometry="1"/>
</listOfReactants>
<listOfProducts>
<speciesReference species="pHer4_2_Nrg" stoichiometry="1"/>
</listOfProducts>
<kineticLaw>
<math xmlns="http://www.w3.org/1998/Math/MathML">
  <apply>
    <minus/>
    <apply>
      <times/>
      <ci> kf7 </ci>
      <ci> pHer4_Nrg </ci>
      <ci> pHer2 </ci>
    </apply>
  </apply>
</math>

```



```

<apply>
  <times/>
  <ci> kr7 </ci>
  <ci> pHer4_2_Nrg </ci>
</apply>
</apply>
</math>
</kineticLaw>
</reaction>
<reaction id="R304" metaid="metaid_0000491" reversible="false">
<listOfReactants>
<speciesReference species="pHer4_Nrg" stoichiometry="1"/>
<speciesReference species="Her2" stoichiometry="1"/>
</listOfReactants>
<listOfProducts>
<speciesReference species="pHer4_2_Nrg" stoichiometry="1"/>
</listOfProducts>
<kineticLaw>
<math xmlns="http://www.w3.org/1998/Math/MathML">
  <apply>
    <times/>
    <ci> kf7 </ci>
    <ci> pHer4_Nrg </ci>
    <ci> Her2 </ci>
  </apply>
</math>
</kineticLaw>
</reaction>
<reaction id="R305" metaid="metaid_0000492" reversible="false">
<listOfReactants>
<speciesReference species="Her4_2_Nrg" stoichiometry="1"/>
</listOfReactants>
<listOfProducts>
<speciesReference species="pHer4_2_Nrg" stoichiometry="1"/>
</listOfProducts>
<kineticLaw>
<math xmlns="http://www.w3.org/1998/Math/MathML">
  <apply>
    <times/>
    <ci> kf30 </ci>
    <ci> Her4_2_Nrg </ci>
  </apply>
</math>
</kineticLaw>
</reaction>
<reaction id="R306" metaid="metaid_0000493" reversible="false">
<listOfReactants>

```

```

<speciesReference species="pHer4_Nrg" stoichiometry="1"/>
</listOfReactants>
<listOfProducts>
<speciesReference species="Her4" stoichiometry="1"/>
<speciesReference species="Nrg" stoichiometry="1"/>
</listOfProducts>
<kineticLaw>
<math xmlns="http://www.w3.org/1998/Math/MathML">
  <apply>
    <times/>
    <ci> kr1 </ci>
    <ci> pHer4_Nrg </ci>
  </apply>
</math>
</kineticLaw>
</reaction>
<reaction id="R307" metaid="metaid_0000494" reversible="true">
<listOfReactants>
<speciesReference species="pHer4_2_Nrg" stoichiometry="1"/>
<speciesReference species="phtase" stoichiometry="1"/>
</listOfReactants>
<listOfProducts>
<speciesReference species="pHer4_2_Nrg_phtase" stoichiometry="1"/>
</listOfProducts>
<kineticLaw>
<math xmlns="http://www.w3.org/1998/Math/MathML">
  <apply>
    <minus/>
    <apply>
      <times/>
      <ci> kf38 </ci>
      <ci> pHer4_2_Nrg </ci>
      <ci> phtase </ci>
    </apply>
    <apply>
      <times/>
      <ci> kr38 </ci>
      <ci> pHer4_2_Nrg_phtase </ci>
    </apply>
  </apply>
</math>
</kineticLaw>
</reaction>
<reaction id="R308" metaid="metaid_0000495" reversible="false">
<listOfReactants>
<speciesReference species="pHer4_2_Nrg_phtase" stoichiometry="1"/>
</listOfReactants>

```

```

</listOfProducts>
<speciesReference species="Her4_2_Nrg" stoichiometry="1"/>
<speciesReference species="phtase" stoichiometry="1"/>
</listOfProducts>
<kineticLaw>
<math xmlns="http://www.w3.org/1998/Math/MathML">
  <apply>
    <times/>
    <ci> kf45 </ci>
    <ci> pHer4_2_Nrg_phtase </ci>
  </apply>
</math>
</kineticLaw>
</reaction>
<reaction id="R309" metaid="metaid_0000496" reversible="true">
<listOfReactants>
<speciesReference species="pHer4_2_Nrg" stoichiometry="1"/>
<speciesReference species="Pi3k" stoichiometry="1"/>
</listOfReactants>
<listOfProducts>
<speciesReference species="pHer4_2_Nrg_Pi3k" stoichiometry="1"/>
</listOfProducts>
<kineticLaw>
<math xmlns="http://www.w3.org/1998/Math/MathML">
  <apply>
    <minus/>
    <apply>
      <times/>
      <ci> kf52 </ci>
      <ci> pHer4_2_Nrg </ci>
      <ci> Pi3k </ci>
    </apply>
    <apply>
      <times/>
      <ci> kr52 </ci>
      <ci> pHer4_2_Nrg_Pi3k </ci>
    </apply>
  </apply>
</math>
</kineticLaw>
</reaction>
<reaction id="R310" metaid="metaid_0000497" reversible="true">
<listOfReactants>
<speciesReference species="pHer4_2_Nrg_Pi3k" stoichiometry="1"/>
<speciesReference species="Pip2" stoichiometry="1"/>
</listOfReactants>
<listOfProducts>

```

```

<speciesReference species="pHer4_2_Nrg_Pi3k_Pip2" stoichiometry="1"/>
</listOfProducts>
<kineticLaw>
<math xmlns="http://www.w3.org/1998/Math/MathML">
  <apply>
    <minus/>
    <apply>
      <times/>
      <ci> kf59 </ci>
      <ci> pHer4_2_Nrg_Pi3k </ci>
      <ci> Pip2 </ci>
    </apply>
    <apply>
      <times/>
      <ci> kr59 </ci>
      <ci> pHer4_2_Nrg_Pi3k_Pip2 </ci>
    </apply>
  </apply>
</math>
</kineticLaw>
</reaction>
<reaction id="R311" metaid="metaid_0000498" reversible="false">
<listOfReactants>
<speciesReference species="pHer4_2_Nrg_Pi3k_Pip2" stoichiometry="1"/>
</listOfReactants>
<listOfProducts>
<speciesReference species="pHer4_2_Nrg_Pi3k" stoichiometry="1"/>
<speciesReference species="Pip3" stoichiometry="1"/>
</listOfProducts>
<kineticLaw>
<math xmlns="http://www.w3.org/1998/Math/MathML">
  <apply>
    <times/>
    <ci> kf66 </ci>
    <ci> pHer4_2_Nrg_Pi3k_Pip2 </ci>
  </apply>
</math>
</kineticLaw>
</reaction>
<reaction id="R312" metaid="metaid_0000499" reversible="true">
<listOfReactants>
<speciesReference species="Her4_Nrg" stoichiometry="1"/>
</listOfReactants>
<listOfProducts>
<speciesReference species="iHer4_Nrg" stoichiometry="1"/>
</listOfProducts>
<kineticLaw>

```

```

<math xmlns="http://www.w3.org/1998/Math/MathML">
  <apply>
    <minus/>
    <apply>
      <times/>
      <ci> kf88 </ci>
      <ci> Her4_Nrg </ci>
    </apply>
    <apply>
      <times/>
      <ci> kr88 </ci>
      <ci> iHer4_Nrg </ci>
    </apply>
  </apply>
</math>
</kineticLaw>
</reaction>
<reaction id="R313" metaid="metaid_0000500" reversible="true">
<listOfReactants>
<speciesReference species="pHer4_Nrg" stoichiometry="1"/>
</listOfReactants>
<listOfProducts>
<speciesReference species="ipHer4_Nrg" stoichiometry="1"/>
</listOfProducts>
<kineticLaw>
<math xmlns="http://www.w3.org/1998/Math/MathML">
  <apply>
    <minus/>
    <apply>
      <times/>
      <ci> kf88 </ci>
      <ci> pHer4_Nrg </ci>
    </apply>
    <apply>
      <times/>
      <ci> kr88 </ci>
      <ci> ipHer4_Nrg </ci>
    </apply>
  </apply>
</math>
</kineticLaw>
</reaction>
<reaction id="R314" metaid="metaid_0000501" reversible="true">
<listOfReactants>
<speciesReference species="Her4_2_Nrg" stoichiometry="1"/>
</listOfReactants>
<listOfProducts>

```

```
<speciesReference species="iHer4_2_Nrg" stoichiometry="1"/>
</listOfProducts>
<kineticLaw>
<math xmlns="http://www.w3.org/1998/Math/MathML">
  <apply>
    <minus/>
    <apply>
      <times/>
      <ci> kf93 </ci>
      <ci> Her4_2_Nrg </ci>
    </apply>
    <apply>
      <times/>
      <ci> kr93 </ci>
      <ci> iHer4_2_Nrg </ci>
    </apply>
  </apply>
</math>
</kineticLaw>
</reaction>
<reaction id="R315" metaid="metaid_0000502" reversible="true">
<listOfReactants>
<speciesReference species="pHer4_2_Nrg" stoichiometry="1"/>
</listOfReactants>
<listOfProducts>
<speciesReference species="ipHer4_2_Nrg" stoichiometry="1"/>
</listOfProducts>
<kineticLaw>
<math xmlns="http://www.w3.org/1998/Math/MathML">
  <apply>
    <minus/>
    <apply>
      <times/>
      <ci> kf93 </ci>
      <ci> pHer4_2_Nrg </ci>
    </apply>
    <apply>
      <times/>
      <ci> kr93 </ci>
      <ci> ipHer4_2_Nrg </ci>
    </apply>
  </apply>
</math>
</kineticLaw>
</reaction>
<reaction id="R316" metaid="metaid_0000503" reversible="true">
<listOfReactants>
```

```
<speciesReference species="pHer4_2_Nrg_phtase" stoichiometry="1"/>
</listOfReactants>
<listOfProducts>
<speciesReference species="ipHer4_2_Nrg_phtase" stoichiometry="1"/>
</listOfProducts>
<kineticLaw>
<math xmlns="http://www.w3.org/1998/Math/MathML">
  <apply>
    <minus/>
    <apply>
      <times/>
      <ci> kf93 </ci>
      <ci> pHer4_2_Nrg_phtase </ci>
    </apply>
    <apply>
      <times/>
      <ci> kr93 </ci>
      <ci> ipHer4_2_Nrg_phtase </ci>
    </apply>
  </apply>
</math>
</kineticLaw>
</reaction>
<reaction id="R317" metaid="metaid_0000504" reversible="true">
<listOfReactants>
<speciesReference species="pHer4_2_Nrg_Pi3k" stoichiometry="1"/>
</listOfReactants>
<listOfProducts>
<speciesReference species="ipHer4_2_Nrg_Pi3k" stoichiometry="1"/>
</listOfProducts>
<kineticLaw>
<math xmlns="http://www.w3.org/1998/Math/MathML">
  <apply>
    <minus/>
    <apply>
      <times/>
      <ci> kf93 </ci>
      <ci> pHer4_2_Nrg_Pi3k </ci>
    </apply>
    <apply>
      <times/>
      <ci> kr93 </ci>
      <ci> ipHer4_2_Nrg_Pi3k </ci>
    </apply>
  </apply>
</math>
</kineticLaw>
```

```

</reaction>
<reaction id="R318" metaid="metaid_0000505" reversible="true">
<listOfReactants>
<speciesReference species="pHer4_2_Nrg_Pi3k_Pip2" stoichiometry="1"/>
</listOfReactants>
<listOfProducts>
<speciesReference species="ipHer4_2_Nrg_Pi3k_Pip2" stoichiometry="1"/>
</listOfProducts>
<kineticLaw>
<math xmlns="http://www.w3.org/1998/Math/MathML">
<apply>
<minus/>
<apply>
<times/>
<ci> kf93 </ci>
<ci> pHer4_2_Nrg_Pi3k_Pip2 </ci>
</apply>
<apply>
<times/>
<ci> kr93 </ci>
<ci> ipHer4_2_Nrg_Pi3k_Pip2 </ci>
</apply>
</apply>
</math>
</kineticLaw>
</reaction>
<reaction id="R319" metaid="metaid_0000506" reversible="true">
<listOfReactants>
<speciesReference species="iNrg" stoichiometry="1"/>
<speciesReference species="iHer4" stoichiometry="1"/>
</listOfReactants>
<listOfProducts>
<speciesReference species="iHer4_Nrg" stoichiometry="1"/>
</listOfProducts>
<kineticLaw>
<math xmlns="http://www.w3.org/1998/Math/MathML">
<apply>
<minus/>
<apply>
<times/>
<ci> kf127 </ci>
<ci> iNrg </ci>
<ci> iHer4 </ci>
</apply>
<apply>
<times/>
<ci> kr1 </ci>

```



```

    <ci> iHer4_Nrg </ci>
  </apply>
</apply>
</math>
</kineticLaw>
</reaction>
<reaction id="R320" metaid="metaid_0000507" reversible="true">
<listOfReactants>
<speciesReference species="iNrg" stoichiometry="1"/>
<speciesReference species="iHer4_2" stoichiometry="1"/>
</listOfReactants>
<listOfProducts>
<speciesReference species="iHer4_2_Nrg" stoichiometry="1"/>
</listOfProducts>
<kineticLaw>
<math xmlns="http://www.w3.org/1998/Math/MathML">
  <apply>
    <minus/>
    <apply>
      <times/>
      <ci> kf127 </ci>
      <ci> iNrg </ci>
      <ci> iHer4_2 </ci>
    </apply>
    <apply>
      <times/>
      <ci> kr1 </ci>
      <ci> iHer4_2_Nrg </ci>
    </apply>
  </apply>
</math>
</kineticLaw>
</reaction>
<reaction id="R321" metaid="metaid_0000508" reversible="true">
<listOfReactants>
<speciesReference species="iHer4_Nrg" stoichiometry="1"/>
<speciesReference species="iHer2" stoichiometry="1"/>
</listOfReactants>
<listOfProducts>
<speciesReference species="iHer4_2_Nrg" stoichiometry="1"/>
</listOfProducts>
<kineticLaw>
<math xmlns="http://www.w3.org/1998/Math/MathML">
  <apply>
    <minus/>
    <apply>
      <times/>

```

```

    <ci> kf7 </ci>
    <ci> iHer4_Nrg </ci>
    <ci> iHer2 </ci>
  </apply>
</apply>
  <times/>
  <ci> kr7 </ci>
  <ci> iHer4_2_Nrg </ci>
</apply>
</apply>
</math>
</kineticLaw>
</reaction>
<reaction id="R322" metaid="metaid_0000509" reversible="true">
<listOfReactants>
<speciesReference species="ipHer4_Nrg" stoichiometry="1"/>
<speciesReference species="ipHer2" stoichiometry="1"/>
</listOfReactants>
<listOfProducts>
<speciesReference species="ipHer4_2_Nrg" stoichiometry="1"/>
</listOfProducts>
<kineticLaw>
<math xmlns="http://www.w3.org/1998/Math/MathML">
  <apply>
    <minus/>
    <apply>
      <times/>
      <ci> kf7 </ci>
      <ci> ipHer4_Nrg </ci>
      <ci> ipHer2 </ci>
    </apply>
    <apply>
      <times/>
      <ci> kr7 </ci>
      <ci> ipHer4_2_Nrg </ci>
    </apply>
  </math>
</kineticLaw>
</reaction>
<reaction id="R323" metaid="metaid_0000510" reversible="false">
<listOfReactants>
<speciesReference species="ipHer4_Nrg" stoichiometry="1"/>
<speciesReference species="iHer2" stoichiometry="1"/>
</listOfReactants>
<listOfProducts>
<speciesReference species="ipHer4_2_Nrg" stoichiometry="1"/>

```

```
</listOfProducts>
<kineticLaw>
<math xmlns="http://www.w3.org/1998/Math/MathML">
  <apply>
    <times/>
    <ci> kf7 </ci>
    <ci> ipHer4_Nrg </ci>
    <ci> iHer2 </ci>
  </apply>
</math>
</kineticLaw>
</reaction>
<reaction id="R324" metaid="metaid_0000511" reversible="true">
<listOfReactants>
<speciesReference species="iHer4" stoichiometry="1"/>
<speciesReference species="iHer2" stoichiometry="1"/>
</listOfReactants>
<listOfProducts>
<speciesReference species="iHer4_2" stoichiometry="1"/>
</listOfProducts>
<kineticLaw>
<math xmlns="http://www.w3.org/1998/Math/MathML">
  <apply>
    <minus/>
    <apply>
      <times/>
      <ci> kf12 </ci>
      <ci> iHer4 </ci>
      <ci> iHer2 </ci>
    </apply>
    <apply>
      <times/>
      <ci> kr12 </ci>
      <ci> iHer4_2 </ci>
    </apply>
  </apply>
</math>
</kineticLaw>
</reaction>
<reaction id="R325" metaid="metaid_0000512" reversible="true">
<listOfReactants>
<speciesReference species="iHer4" stoichiometry="2"/>
</listOfReactants>
<listOfProducts>
<speciesReference species="iHer4_4" stoichiometry="1"/>
</listOfProducts>
<kineticLaw>
```

```

<math xmlns="http://www.w3.org/1998/Math/MathML">
  <apply>
    <minus/>
    <apply>
      <times/>
      <ci> kf12 </ci>
      <ci> iHer4 </ci>
      <ci> iHer4 </ci>
    </apply>
    <apply>
      <times/>
      <ci> kr12 </ci>
      <ci> iHer4_4 </ci>
    </apply>
  </apply>
</math>
</kineticLaw>
</reaction>
<reaction id="R326" metaid="metaid_0000513" reversible="true">
<listOfReactants>
<speciesReference species="iHer4" stoichiometry="1"/>
<speciesReference species="iHer3" stoichiometry="1"/>
</listOfReactants>
<listOfProducts>
<speciesReference species="iHer4_3" stoichiometry="1"/>
</listOfProducts>
<kineticLaw>
<math xmlns="http://www.w3.org/1998/Math/MathML">
  <apply>
    <minus/>
    <apply>
      <times/>
      <ci> kf12 </ci>
      <ci> iHer4 </ci>
      <ci> iHer3 </ci>
    </apply>
    <apply>
      <times/>
      <ci> kr12 </ci>
      <ci> iHer4_3 </ci>
    </apply>
  </apply>
</math>
</kineticLaw>
</reaction>
<reaction id="R327" metaid="metaid_0000514" reversible="true">
<listOfReactants>

```

```

<speciesReference species="iHer4" stoichiometry="1"/>
<speciesReference species="iEgfr" stoichiometry="1"/>
</listOfReactants>
<listOfProducts>
<speciesReference species="iHer4_1" stoichiometry="1"/>
</listOfProducts>
<kineticLaw>
<math xmlns="http://www.w3.org/1998/Math/MathML">
  <apply>
    <minus/>
    <apply>
      <times/>
      <ci> kf12 </ci>
      <ci> iHer4 </ci>
      <ci> iEgfr </ci>
    </apply>
    <apply>
      <times/>
      <ci> kr12 </ci>
      <ci> iHer4_1 </ci>
    </apply>
  </apply>
</math>
</kineticLaw>
</reaction>
<reaction id="R328" metaid="metaid_0000515" reversible="false">
<listOfReactants>
<speciesReference species="iHer4_2_Nrg" stoichiometry="1"/>
</listOfReactants>
<listOfProducts>
<speciesReference species="ipHer4_2_Nrg" stoichiometry="1"/>
</listOfProducts>
<kineticLaw>
<math xmlns="http://www.w3.org/1998/Math/MathML">
  <apply>
    <times/>
    <ci> kf30 </ci>
    <ci> iHer4_2_Nrg </ci>
  </apply>
</math>
</kineticLaw>
</reaction>
<reaction id="R329" metaid="metaid_0000516" reversible="false">
<listOfReactants>
<speciesReference species="ipHer4_Nrg" stoichiometry="1"/>
</listOfReactants>
<listOfProducts>

```

```

<speciesReference species="iNrg" stoichiometry="1"/>
<speciesReference species="iHer4" stoichiometry="1"/>
</listOfProducts>
<kineticLaw>
<math xmlns="http://www.w3.org/1998/Math/MathML">
  <apply>
    <times/>
    <ci> kr1 </ci>
    <ci> ipHer4_Nrg </ci>
  </apply>
</math>
</kineticLaw>
</reaction>
<reaction id="R330" metaid="metaid_0000517" reversible="true">
<listOfReactants>
<speciesReference species="ipHer4_2_Nrg" stoichiometry="1"/>
<speciesReference species="phtase" stoichiometry="1"/>
</listOfReactants>
<listOfProducts>
<speciesReference species="ipHer4_2_Nrg_phtase" stoichiometry="1"/>
</listOfProducts>
<kineticLaw>
<math xmlns="http://www.w3.org/1998/Math/MathML">
  <apply>
    <minus/>
    <apply>
      <times/>
      <ci> kf38 </ci>
      <ci> ipHer4_2_Nrg </ci>
      <ci> phtase </ci>
    </apply>
    <apply>
      <times/>
      <ci> kr38 </ci>
      <ci> ipHer4_2_Nrg_phtase </ci>
    </apply>
  </math>
</kineticLaw>
</reaction>
<reaction id="R331" metaid="metaid_0000518" reversible="false">
<listOfReactants>
<speciesReference species="ipHer4_2_Nrg_phtase" stoichiometry="1"/>
</listOfReactants>
<listOfProducts>
<speciesReference species="iHer4_2_Nrg" stoichiometry="1"/>
<speciesReference species="phtase" stoichiometry="1"/>

```

```

</listOfProducts>
<kineticLaw>
<math xmlns="http://www.w3.org/1998/Math/MathML">
  <apply>
    <times/>
    <ci> kf45 </ci>
    <ci> ipHer4_2_Nrg_phtase </ci>
  </apply>
</math>
</kineticLaw>
</reaction>
<reaction id="R332" metaid="metaid_0000519" reversible="true">
<listOfReactants>
<speciesReference species="ipHer4_2_Nrg" stoichiometry="1"/>
<speciesReference species="Pi3k" stoichiometry="1"/>
</listOfReactants>
<listOfProducts>
<speciesReference species="ipHer4_2_Nrg_Pi3k" stoichiometry="1"/>
</listOfProducts>
<kineticLaw>
<math xmlns="http://www.w3.org/1998/Math/MathML">
  <apply>
    <minus/>
    <apply>
      <times/>
      <ci> kf52 </ci>
      <ci> ipHer4_2_Nrg </ci>
      <ci> Pi3k </ci>
    </apply>
    <apply>
      <times/>
      <ci> kr52 </ci>
      <ci> ipHer4_2_Nrg_Pi3k </ci>
    </apply>
  </apply>
</math>
</kineticLaw>
</reaction>
<reaction id="R333" metaid="metaid_0000520" reversible="false">
<listOfReactants>
<speciesReference species="iHer4_Nrg" stoichiometry="1"/>
</listOfReactants>
<listOfProducts>
<speciesReference species="dHer4_Nrg" stoichiometry="1"/>
</listOfProducts>
<kineticLaw>
<math xmlns="http://www.w3.org/1998/Math/MathML">

```

```
<apply>
  <times/>
  <ci> kf187 </ci>
  <ci> iHer4_Nrg </ci>
</apply>
</math>
</kineticLaw>
</reaction>
<reaction id="R334" metaid="metaid_0000521" reversible="false">
<listOfReactants>
<speciesReference species="ipHer4_Nrg" stoichiometry="1"/>
</listOfReactants>
<listOfProducts>
<speciesReference species="dpHer4_Nrg" stoichiometry="1"/>
</listOfProducts>
<kineticLaw>
<math xmlns="http://www.w3.org/1998/Math/MathML">
  <apply>
    <times/>
    <ci> kf187 </ci>
    <ci> ipHer4_Nrg </ci>
  </apply>
</math>
</kineticLaw>
</reaction>
<reaction id="R335" metaid="metaid_0000522" reversible="false">
<listOfReactants>
<speciesReference species="iHer4_2_Nrg" stoichiometry="1"/>
</listOfReactants>
<listOfProducts>
<speciesReference species="dHer4_2_Nrg" stoichiometry="1"/>
</listOfProducts>
<kineticLaw>
<math xmlns="http://www.w3.org/1998/Math/MathML">
  <apply>
    <times/>
    <ci> kf192 </ci>
    <ci> iHer4_2_Nrg </ci>
  </apply>
</math>
</kineticLaw>
</reaction>
<reaction id="R336" metaid="metaid_0000523" reversible="false">
<listOfReactants>
<speciesReference species="ipHer4_2_Nrg" stoichiometry="1"/>
</listOfReactants>
<listOfProducts>
```



```
<speciesReference species="dpHer4_2_Nrg" stoichiometry="1"/>
</listOfProducts>
<kineticLaw>
<math xmlns="http://www.w3.org/1998/Math/MathML">
  <apply>
    <times/>
    <ci> kf192 </ci>
    <ci> ipHer4_2_Nrg </ci>
  </apply>
</math>
</kineticLaw>
</reaction>
<reaction id="R337" metaid="metaid_0000524" reversible="false">
<listOfReactants>
<speciesReference species="ipHer4_2_Nrg_phtase" stoichiometry="1"/>
</listOfReactants>
<listOfProducts>
<speciesReference species="dpHer4_2_Nrg_phtase" stoichiometry="1"/>
</listOfProducts>
<kineticLaw>
<math xmlns="http://www.w3.org/1998/Math/MathML">
  <apply>
    <times/>
    <ci> kf192 </ci>
    <ci> ipHer4_2_Nrg_phtase </ci>
  </apply>
</math>
</kineticLaw>
</reaction>
<reaction id="R338" metaid="metaid_0000525" reversible="false">
<listOfReactants>
<speciesReference species="ipHer4_2_Nrg_Pi3k" stoichiometry="1"/>
</listOfReactants>
<listOfProducts>
<speciesReference species="dpHer4_2_Nrg_Pi3k" stoichiometry="1"/>
</listOfProducts>
<kineticLaw>
<math xmlns="http://www.w3.org/1998/Math/MathML">
  <apply>
    <times/>
    <ci> kf192 </ci>
    <ci> ipHer4_2_Nrg_Pi3k </ci>
  </apply>
</math>
</kineticLaw>
</reaction>
<reaction id="R339" metaid="metaid_0000526" reversible="false">
```

```

<listOfReactants>
<speciesReference species="ipHer4_2_Nrg_Pi3k_Pip2" stoichiometry="1"/>
</listOfReactants>
<listOfProducts>
<speciesReference species="dpHer4_2_Nrg_Pi3k_Pip2" stoichiometry="1"/>
</listOfProducts>
<kineticLaw>
<math xmlns="http://www.w3.org/1998/Math/MathML">
  <apply>
    <times/>
    <ci> kf192 </ci>
    <ci> ipHer4_2_Nrg_Pi3k_Pip2 </ci>
  </apply>
</math>
</kineticLaw>
</reaction>
<reaction id="R340" metaid="metaid_0000527" reversible="true">
<listOfReactants>
<speciesReference species="pHer4_Nrg" stoichiometry="1"/>
<speciesReference species="Her4" stoichiometry="1"/>
</listOfReactants>
<listOfProducts>
<speciesReference species="pHer4_4_Nrg" stoichiometry="1"/>
</listOfProducts>
<kineticLaw>
<math xmlns="http://www.w3.org/1998/Math/MathML">
  <apply>
    <minus/>
    <apply>
      <times/>
      <ci> kf10 </ci>
      <ci> pHer4_Nrg </ci>
      <ci> Her4 </ci>
    </apply>
    <apply>
      <times/>
      <ci> kr7 </ci>
      <ci> pHer4_4_Nrg </ci>
    </apply>
  </apply>
</math>
</kineticLaw>
</reaction>
<reaction id="R341" metaid="metaid_0000528" reversible="true">
<listOfReactants>
<speciesReference species="Nrg" stoichiometry="1"/>
<speciesReference species="Her4_3" stoichiometry="1"/>

```

```
</listOfReactants>
<listOfProducts>
<speciesReference species="Her4_3_Nrg" stoichiometry="1"/>
</listOfProducts>
<kineticLaw>
<math xmlns="http://www.w3.org/1998/Math/MathML">
  <apply>
    <minus/>
    <apply>
      <times/>
      <ci> kf2 </ci>
      <ci> Nrg </ci>
      <ci> Her4_3 </ci>
    </apply>
    <apply>
      <times/>
      <ci> kr2 </ci>
      <ci> Her4_3_Nrg </ci>
    </apply>
  </apply>
</math>
</kineticLaw>
</reaction>
<reaction id="R342" metaid="metaid_0000529" reversible="true">
<listOfReactants>
<speciesReference species="Her4_Nrg" stoichiometry="1"/>
<speciesReference species="Her3" stoichiometry="1"/>
</listOfReactants>
<listOfProducts>
<speciesReference species="Her4_3_Nrg" stoichiometry="1"/>
</listOfProducts>
<kineticLaw>
<math xmlns="http://www.w3.org/1998/Math/MathML">
  <apply>
    <minus/>
    <apply>
      <times/>
      <ci> kf7 </ci>
      <ci> Her4_Nrg </ci>
      <ci> Her3 </ci>
    </apply>
    <apply>
      <times/>
      <ci> kr7 </ci>
      <ci> Her4_3_Nrg </ci>
    </apply>
  </apply>
</math>
</kineticLaw>
</reaction>
```

```

</math>
</kineticLaw>
</reaction>
<reaction id="R343" metaid="metaid_0000530" reversible="false">
<listOfReactants>
<speciesReference species="pHer4_Nrg" stoichiometry="1"/>

<speciesReference species="Her3" stoichiometry="1"/>
</listOfReactants>
<listOfProducts>
<speciesReference species="pHer4_3_Nrg" stoichiometry="1"/>
</listOfProducts>
<kineticLaw>
<math xmlns="http://www.w3.org/1998/Math/MathML">
  <apply>
    <times/>
    <ci> kf7 </ci>
    <ci> pHer4_Nrg </ci>
    <ci> Her3 </ci>
  </apply>
</math>
</kineticLaw>
</reaction>
<reaction id="R344" metaid="metaid_0000531" reversible="false">
<listOfReactants>
<speciesReference species="Her4_3_Nrg" stoichiometry="1"/>
</listOfReactants>
<listOfProducts>
<speciesReference species="pHer4_3_Nrg" stoichiometry="1"/>
</listOfProducts>
<kineticLaw>
<math xmlns="http://www.w3.org/1998/Math/MathML">
  <apply>
    <times/>
    <ci> kf30 </ci>
    <ci> Her4_3_Nrg </ci>
  </apply>
</math>
</kineticLaw>
</reaction>
<reaction id="R345" metaid="metaid_0000532" reversible="true">
<listOfReactants>
<speciesReference species="pHer4_3_Nrg" stoichiometry="1"/>
<speciesReference species="phtase" stoichiometry="1"/>
</listOfReactants>
<listOfProducts>
<speciesReference species="pHer4_3_Nrg_phtase" stoichiometry="1"/>

```

```

</listOfProducts>
<kineticLaw>
<math xmlns="http://www.w3.org/1998/Math/MathML">
  <apply>
    <minus/>
    <apply>
      <times/>
      <ci> kf38 </ci>
      <ci> pHer4_3_Nrg </ci>
      <ci> phtase </ci>
    </apply>
    <apply>
      <times/>
      <ci> kr38 </ci>
      <ci> pHer4_3_Nrg_phtase </ci>
    </apply>
  </apply>
</math>
</kineticLaw>
</reaction>
<reaction id="R346" metaid="metaid_0000533" reversible="false">
<listOfReactants>
<speciesReference species="pHer4_3_Nrg_phtase" stoichiometry="1"/>
</listOfReactants>
<listOfProducts>
<speciesReference species="Her4_3_Nrg" stoichiometry="1"/>
<speciesReference species="phtase" stoichiometry="1"/>
</listOfProducts>
<kineticLaw>
<math xmlns="http://www.w3.org/1998/Math/MathML">
  <apply>
    <times/>
    <ci> kf45 </ci>
    <ci> pHer4_3_Nrg_phtase </ci>
  </apply>
</math>
</kineticLaw>
</reaction>
<reaction id="R347" metaid="metaid_0000534" reversible="true">
<listOfReactants>
<speciesReference species="pHer4_3_Nrg" stoichiometry="1"/>
<speciesReference species="Pi3k" stoichiometry="1"/>
</listOfReactants>
<listOfProducts>
<speciesReference species="pHer4_3_Nrg_Pi3k" stoichiometry="1"/>
</listOfProducts>
<kineticLaw>

```

```

<math xmlns="http://www.w3.org/1998/Math/MathML">
  <apply>
    <minus/>
    <apply>
      <times/>
      <ci> kf52 </ci>
      <ci> pHer4_3_Nrg </ci>
      <ci> Pi3k </ci>
    </apply>
    <apply>
      <times/>
      <ci> kr52 </ci>
      <ci> pHer4_3_Nrg_Pi3k </ci>
    </apply>
  </apply>
</math>
</kineticLaw>
</reaction>
<reaction id="R348" metaid="metaid_0000535" reversible="true">
<listOfReactants>
<speciesReference species="pHer4_3_Nrg_Pi3k" stoichiometry="1"/>
<speciesReference species="Pip2" stoichiometry="1"/>
</listOfReactants>
<listOfProducts>
<speciesReference species="pHer4_3_Nrg_Pi3k_Pip2" stoichiometry="1"/>
</listOfProducts>
<kineticLaw>
<math xmlns="http://www.w3.org/1998/Math/MathML">
  <apply>
    <minus/>
    <apply>
      <times/>
      <ci> kf59 </ci>
      <ci> pHer4_3_Nrg_Pi3k </ci>
      <ci> Pip2 </ci>
    </apply>
    <apply>
      <times/>
      <ci> kr59 </ci>
      <ci> pHer4_3_Nrg_Pi3k_Pip2 </ci>
    </apply>
  </apply>
</math>
</kineticLaw>
</reaction>
<reaction id="R349" metaid="metaid_0000536" reversible="false">
<listOfReactants>

```

```

<speciesReference species="pHer4_3_Nrg_Pi3k_Pip2" stoichiometry="1"/>
</listOfReactants>
<listOfProducts>
<speciesReference species="pHer4_3_Nrg_Pi3k" stoichiometry="1"/>
<speciesReference species="Pip3" stoichiometry="1"/>
</listOfProducts>
<kineticLaw>
<math xmlns="http://www.w3.org/1998/Math/MathML">
  <apply>
    <times/>
    <ci> kf66 </ci>
    <ci> pHer4_3_Nrg_Pi3k_Pip2 </ci>
  </apply>
</math>
</kineticLaw>
</reaction>
<reaction id="R350" metaid="metaid_0000537" reversible="true">
<listOfReactants>
<speciesReference species="Her4_3_Nrg" stoichiometry="1"/>
</listOfReactants>
<listOfProducts>
<speciesReference species="iHer4_3_Nrg" stoichiometry="1"/>
</listOfProducts>
<kineticLaw>
<math xmlns="http://www.w3.org/1998/Math/MathML">
  <apply>
    <minus/>
    <apply>
      <times/>
      <ci> kf93 </ci>
      <ci> Her4_3_Nrg </ci>
    </apply>
  </apply>
  <apply>
    <times/>
    <ci> kr93 </ci>
    <ci> iHer4_3_Nrg </ci>
  </apply>
</math>
</kineticLaw>
</reaction>
<reaction id="R351" metaid="metaid_0000538" reversible="true">
<listOfReactants>
<speciesReference species="pHer4_3_Nrg" stoichiometry="1"/>
</listOfReactants>
<listOfProducts>
<speciesReference species="ipHer4_3_Nrg" stoichiometry="1"/>

```

```

</listOfProducts>
<kineticLaw>
<math xmlns="http://www.w3.org/1998/Math/MathML">
  <apply>
    <minus/>
    <apply>
      <times/>
      <ci> kf93 </ci>
      <ci> pHer4_3_Nrg </ci>
    </apply>
    <apply>
      <times/>
      <ci> kr93 </ci>
      <ci> ipHer4_3_Nrg </ci>
    </apply>
  </apply>
</math>
</kineticLaw>
</reaction>
<reaction id="R352" metaid="metaid_0000539" reversible="true">
<listOfReactants>
<speciesReference species="pHer4_3_Nrg_phtase" stoichiometry="1"/>
</listOfReactants>
<listOfProducts>
<speciesReference species="ipHer4_3_Nrg_phtase" stoichiometry="1"/>
</listOfProducts>
<kineticLaw>
<math xmlns="http://www.w3.org/1998/Math/MathML">
  <apply>
    <minus/>
    <apply>
      <times/>
      <ci> kf93 </ci>
      <ci> pHer4_3_Nrg_phtase </ci>
    </apply>
    <apply>
      <times/>
      <ci> kr93 </ci>
      <ci> ipHer4_3_Nrg_phtase </ci>
    </apply>
  </apply>
</math>
</kineticLaw>
</reaction>
<reaction id="R353" metaid="metaid_0000540" reversible="true">
<listOfReactants>
<speciesReference species="pHer4_3_Nrg_Pi3k" stoichiometry="1"/>

```



```
</listOfReactants>
<listOfProducts>
<speciesReference species="ipHer4_3_Nrg_Pi3k" stoichiometry="1"/>
</listOfProducts>
<kineticLaw>
<math xmlns="http://www.w3.org/1998/Math/MathML">
  <apply>
    <minus/>
    <apply>
      <times/>
      <ci> kf93 </ci>
      <ci> pHer4_3_Nrg_Pi3k </ci>
    </apply>
    <apply>
      <times/>
      <ci> kr93 </ci>
      <ci> ipHer4_3_Nrg_Pi3k </ci>
    </apply>
  </apply>
</math>
</kineticLaw>
</reaction>
<reaction id="R354" metaid="metaid_0000541" reversible="true">
<listOfReactants>
<speciesReference species="pHer4_3_Nrg_Pi3k_Pip2" stoichiometry="1"/>
</listOfReactants>
<listOfProducts>
<speciesReference species="ipHer4_3_Nrg_Pi3k_Pip2" stoichiometry="1"/>
</listOfProducts>
<kineticLaw>
<math xmlns="http://www.w3.org/1998/Math/MathML">
  <apply>
    <minus/>
    <apply>
      <times/>
      <ci> kf93 </ci>
      <ci> pHer4_3_Nrg_Pi3k_Pip2 </ci>
    </apply>
    <apply>
      <times/>
      <ci> kr93 </ci>
      <ci> ipHer4_3_Nrg_Pi3k_Pip2 </ci>
    </apply>
  </apply>
</math>
</kineticLaw>
</reaction>
```

```

<reaction id="R355" metaid="metaid_0000542" reversible="true">
<listOfReactants>
<speciesReference species="iNrg" stoichiometry="1"/>
<speciesReference species="iHer4_3" stoichiometry="1"/>
</listOfReactants>
<listOfProducts>
<speciesReference species="iHer4_3_Nrg" stoichiometry="1"/>
</listOfProducts>
<kineticLaw>
<math xmlns="http://www.w3.org/1998/Math/MathML">
<apply>
<minus/>
<apply>
<times/>
<ci> kf127 </ci>
<ci> iNrg </ci>
<ci> iHer4_3 </ci>
</apply>
<apply>
<times/>
<ci> kr1 </ci>
<ci> iHer4_3_Nrg </ci>
</apply>
</apply>
</math>
</kineticLaw>
</reaction>
<reaction id="R356" metaid="metaid_0000543" reversible="true">
<listOfReactants>
<speciesReference species="iHer4_Nrg" stoichiometry="1"/>
<speciesReference species="iHer3" stoichiometry="1"/>
</listOfReactants>
<listOfProducts>
<speciesReference species="iHer4_3_Nrg" stoichiometry="1"/>
</listOfProducts>
<kineticLaw>
<math xmlns="http://www.w3.org/1998/Math/MathML">
<apply>
<minus/>
<apply>
<times/>
<ci> kf7 </ci>
<ci> iHer4_Nrg </ci>
<ci> iHer3 </ci>
</apply>
<apply>
<times/>

```

```
<ci> kr7 </ci>
<ci> iHer4_3_Nrg </ci>
</apply>
</math>
</kineticLaw>
</reaction>
<reaction id="R357" metaid="metaid_0000544" reversible="false">
<listOfReactants>
<speciesReference species="ipHer4_Nrg" stoichiometry="1"/>
<speciesReference species="iHer3" stoichiometry="1"/>
</listOfReactants>
<listOfProducts>
<speciesReference species="ipHer4_3_Nrg" stoichiometry="1"/>
</listOfProducts>
<kineticLaw>
<math xmlns="http://www.w3.org/1998/Math/MathML">
<apply>
<times/>
<ci> kf7 </ci>
<ci> ipHer4_Nrg </ci>
<ci> iHer3 </ci>
</apply>
</math>
</kineticLaw>
</reaction>
<reaction id="R358" metaid="metaid_0000545" reversible="false">
<listOfReactants>
<speciesReference species="iHer4_3_Nrg" stoichiometry="1"/>
</listOfReactants>
<listOfProducts>
<speciesReference species="ipHer4_3_Nrg" stoichiometry="1"/>
</listOfProducts>
<kineticLaw>
<math xmlns="http://www.w3.org/1998/Math/MathML">
<apply>
<times/>
<ci> kf30 </ci>
<ci> iHer4_3_Nrg </ci>
</apply>
</math>
</kineticLaw>
</reaction>
<reaction id="R359" metaid="metaid_0000546" reversible="true">
<listOfReactants>
<speciesReference species="ipHer4_3_Nrg" stoichiometry="1"/>
<speciesReference species="phtase" stoichiometry="1"/>
```

```

</listOfReactants>
<listOfProducts>
<speciesReference species="ipHer4_3_Nrg_phtase" stoichiometry="1"/>
</listOfProducts>
<kineticLaw>
<math xmlns="http://www.w3.org/1998/Math/MathML">
  <apply>
    <minus/>
    <apply>
      <times/>
      <ci> kf38 </ci>
      <ci> ipHer4_3_Nrg </ci>
      <ci> phtase </ci>
    </apply>
    <apply>
      <times/>
      <ci> kr38 </ci>
      <ci> ipHer4_3_Nrg_phtase </ci>
    </apply>
  </apply>
</math>
</kineticLaw>
</reaction>
<reaction id="R360" metaid="metaid_0000547" reversible="false">
<listOfReactants>
<speciesReference species="ipHer4_3_Nrg_phtase" stoichiometry="1"/>
</listOfReactants>
<listOfProducts>
<speciesReference species="iHer4_3_Nrg" stoichiometry="1"/>
<speciesReference species="phtase" stoichiometry="1"/>
</listOfProducts>
<kineticLaw>
<math xmlns="http://www.w3.org/1998/Math/MathML">
  <apply>
    <times/>
    <ci> kf45 </ci>
    <ci> ipHer4_3_Nrg_phtase </ci>
  </apply>
</math>
</kineticLaw>
</reaction>
<reaction id="R361" metaid="metaid_0000548" reversible="true">
<listOfReactants>
<speciesReference species="ipHer4_3_Nrg" stoichiometry="1"/>
<speciesReference species="Pi3k" stoichiometry="1"/>
</listOfReactants>
<listOfProducts>

```

```

<speciesReference species="ipHer4_3_Nrg_Pi3k" stoichiometry="1"/>
</listOfProducts>
<kineticLaw>
<math xmlns="http://www.w3.org/1998/Math/MathML">
  <apply>
    <minus/>
    <apply>
      <times/>
      <ci> kf52 </ci>
      <ci> ipHer4_3_Nrg </ci>
      <ci> Pi3k </ci>
    </apply>
  </apply>
  <times/>
  <ci> kr52 </ci>
  <ci> ipHer4_3_Nrg_Pi3k </ci>
</apply>
</math>
</kineticLaw>
</reaction>
<reaction id="R362" metaid="metaid_0000549" reversible="false">
<listOfReactants>
<speciesReference species="iHer4_3_Nrg" stoichiometry="1"/>
</listOfReactants>
<listOfProducts>
<speciesReference species="dHer4_3_Nrg" stoichiometry="1"/>
</listOfProducts>
<kineticLaw>
<math xmlns="http://www.w3.org/1998/Math/MathML">
  <apply>
    <times/>
    <ci> kf192 </ci>
    <ci> iHer4_3_Nrg </ci>
  </apply>
</math>
</kineticLaw>
</reaction>
<reaction id="R363" metaid="metaid_0000550" reversible="false">
<listOfReactants>
<speciesReference species="ipHer4_3_Nrg" stoichiometry="1"/>
</listOfReactants>
<listOfProducts>
<speciesReference species="dpHer4_3_Nrg" stoichiometry="1"/>
</listOfProducts>
<kineticLaw>
<math xmlns="http://www.w3.org/1998/Math/MathML">

```

```

<apply>
  <times/>
  <ci> kf192 </ci>
  <ci> ipHer4_3_Nrg </ci>
</apply>
</math>
</kineticLaw>
</reaction>
<reaction id="R364" metaid="metaid_0000551" reversible="false">
<listOfReactants>
<speciesReference species="ipHer4_3_Nrg_phtase"/>
</listOfReactants>
<listOfProducts>
<speciesReference species="dpHer4_3_Nrg_phtase" stoichiometry="1"/>
</listOfProducts>
<kineticLaw>
<math xmlns="http://www.w3.org/1998/Math/MathML">
  <apply>
    <times/>
    <ci> kf192 </ci>
    <ci> ipHer4_3_Nrg_phtase </ci>
  </apply>
</math>
</kineticLaw>
</reaction>
<reaction id="R365" metaid="metaid_0000552" reversible="false">
<listOfReactants>
<speciesReference species="ipHer4_3_Nrg_Pi3k" stoichiometry="1"/>
</listOfReactants>
<listOfProducts>
<speciesReference species="dpHer4_3_Nrg_Pi3k" stoichiometry="1"/>
</listOfProducts>
<kineticLaw>
<math xmlns="http://www.w3.org/1998/Math/MathML">
  <apply>
    <times/>
    <ci> kf192 </ci>
    <ci> ipHer4_3_Nrg_Pi3k </ci>
  </apply>
</math>
</kineticLaw>
</reaction>
<reaction id="R366" metaid="metaid_0000553" reversible="false">
<listOfReactants>
<speciesReference species="ipHer4_3_Nrg_Pi3k_Pip2" stoichiometry="1"/>
</listOfReactants>
<listOfProducts>

```

```
<speciesReference species="dpHer4_3_Nrg_Pi3k_Pip2" stoichiometry="1"/>
</listOfProducts>
<kineticLaw>
<math xmlns="http://www.w3.org/1998/Math/MathML">
  <apply>
    <times/>
    <ci> kf192 </ci>
    <ci> ipHer4_3_Nrg_Pi3k_Pip2 </ci>
  </apply>
</math>
</kineticLaw>
</reaction>
<reaction id="R367" metaid="metaid_0000554" reversible="true">
<listOfReactants>
<speciesReference species="Her4" stoichiometry="2"/>
</listOfReactants>
<listOfProducts>
<speciesReference species="Her4_4" stoichiometry="1"/>
</listOfProducts>
<kineticLaw>
<math xmlns="http://www.w3.org/1998/Math/MathML">
  <apply>
    <minus/>
    <apply>
      <times/>
      <ci> kf12 </ci>
      <ci> Her4 </ci>
      <ci> Her4 </ci>
    </apply>
    <apply>
      <times/>
      <ci> kr12 </ci>
      <ci> Her4_4 </ci>
    </apply>
  </apply>
</math>
</kineticLaw>
</reaction>
<reaction id="R368" metaid="metaid_0000555" reversible="true">
<listOfReactants>
<speciesReference species="Her4" stoichiometry="1"/>
<speciesReference species="Her3" stoichiometry="1"/>
</listOfReactants>
<listOfProducts>
<speciesReference species="Her4_3" stoichiometry="1"/>
</listOfProducts>
<kineticLaw>
```

```

<math xmlns="http://www.w3.org/1998/Math/MathML">
  <apply>
    <minus/>
    <apply>
      <times/>
      <ci> kf12 </ci>
      <ci> Her4 </ci>
      <ci> Her3 </ci>
    </apply>
    <apply>
      <times/>
      <ci> kr12 </ci>
      <ci> Her4_3 </ci>
    </apply>
  </apply>
</math>
</kineticLaw>
</reaction>
<reaction id="R369" metaid="metaid_0000556" reversible="true">
<listOfReactants>
<speciesReference species="Her4" stoichiometry="1"/>
<speciesReference species="Her2" stoichiometry="1"/>
</listOfReactants>
<listOfProducts>
<speciesReference species="Her4_2" stoichiometry="1"/>
</listOfProducts>
<kineticLaw>
<math xmlns="http://www.w3.org/1998/Math/MathML">
  <apply>
    <minus/>
    <apply>
      <times/>
      <ci> kf12 </ci>
      <ci> Her4 </ci>
      <ci> Her2 </ci>
    </apply>
    <apply>
      <times/>
      <ci> kr12 </ci>
      <ci> Her4_2 </ci>
    </apply>
  </apply>
</math>
</kineticLaw>
</reaction>
<reaction id="R370" metaid="metaid_0000557" reversible="true">
<listOfReactants>

```



```

<speciesReference species="Her4" stoichiometry="1"/>
<speciesReference species="Egfr" stoichiometry="1"/>
</listOfReactants>
<listOfProducts>
<speciesReference species="Her4_1" stoichiometry="1"/>
</listOfProducts>
<kineticLaw>
<math xmlns="http://www.w3.org/1998/Math/MathML">
  <apply>
    <minus/>
    <apply>
      <times/>
      <ci> kf12 </ci>
      <ci> Her4 </ci>
      <ci> Egfr </ci>
    </apply>
    <apply>
      <times/>
      <ci> kr12 </ci>
      <ci> Her4_1 </ci>
    </apply>
  </apply>
</math>
</kineticLaw>
</reaction>
<reaction id="R371" metaid="metaid_0000558" reversible="true">
<listOfReactants>
<speciesReference species="Her4" stoichiometry="1"/>
<speciesReference species="JAK" stoichiometry="1"/>
</listOfReactants>
<listOfProducts>
<speciesReference species="RJ" stoichiometry="1"/>
</listOfProducts>
<kineticLaw>
<math xmlns="http://www.w3.org/1998/Math/MathML">
  <apply>
    <minus/>
    <apply>
      <times/>
      <ci> kf1_jak </ci>
      <ci> Her4 </ci>
      <ci> JAK </ci>
    </apply>
    <apply>
      <times/>
      <ci> kr1_jak </ci>
      <ci> RJ </ci>
    </apply>
  </apply>
</math>

```

```

    </apply>
  </apply>
</math>
</kineticLaw>
</reaction>
<reaction id="R372" metaid="metaid_0000559" reversible="true">
<listOfReactants>
<speciesReference species="Nrg" stoichiometry="1"/>
<speciesReference species="RJ" stoichiometry="1"/>
</listOfReactants>
<listOfProducts>
<speciesReference species="IFNRJ" stoichiometry="1"/>
</listOfProducts>
<kineticLaw>
<math xmlns="http://www.w3.org/1998/Math/MathML">
  <apply>
    <minus/>
    <apply>
      <times/>
      <ci> kf2_jak </ci>
      <ci> Nrg </ci>
      <ci> RJ </ci>
    </apply>
    <apply>
      <times/>
      <ci> kr2_jak </ci>
      <ci> IFNRJ </ci>
    </apply>
  </apply>
</math>
</kineticLaw>
</reaction>
<reaction id="R373" metaid="metaid_0000560" reversible="true">
<listOfReactants>
<speciesReference species="IFNRJ" stoichiometry="2"/>
</listOfReactants>
<listOfProducts>
<speciesReference species="IFNRJ2" stoichiometry="1"/>
</listOfProducts>
<kineticLaw>
<math xmlns="http://www.w3.org/1998/Math/MathML">
  <apply>
    <minus/>
    <apply>
      <times/>
      <ci> kf3_jak </ci>
      <ci> IFNRJ </ci>

```

```

    <ci> IFNRJ </ci>
  </apply>
</apply>
  <times/>
  <ci> kr3_jak </ci>
  <ci> IFNRJ2 </ci>
</apply>
</apply>
</math>
</kineticLaw>
</reaction>
<reaction id="R374" metaid="metaid_0000561" reversible="false">
<listOfReactants>
<speciesReference species="IFNRJ2" stoichiometry="1"/>
</listOfReactants>
<listOfProducts>
<speciesReference species="pIFNRJ2" stoichiometry="1"/>
</listOfProducts>
<kineticLaw>
<math xmlns="http://www.w3.org/1998/Math/MathML">
  <apply>
    <times/>
    <ci> kf4_jak </ci>
    <ci> IFNRJ2 </ci>
  </apply>
</math>
</kineticLaw>
</reaction>
<reaction id="R375" metaid="metaid_0000562" reversible="true">
<listOfReactants>
<speciesReference species="pIFNRJ2" stoichiometry="1"/>
<speciesReference species="STATc" stoichiometry="1"/>
</listOfReactants>
<listOfProducts>
<speciesReference species="pIFNRJ2_STATc" stoichiometry="1"/>
</listOfProducts>
<kineticLaw>
<math xmlns="http://www.w3.org/1998/Math/MathML">
  <apply>
    <minus/>
    <apply>
      <times/>
      <ci> kf5_jak </ci>
      <ci> pIFNRJ2 </ci>
      <ci> STATc </ci>
    </apply>
  </apply>
</math>
</kineticLaw>

```

```

    </times/>
    <ci> kr5_jak </ci>
    <ci> pIFNRJ2_STATc </ci>
  </apply>
</math>
</kineticLaw>
</reaction>
<reaction id="R376" metaid="metaid_0000563" reversible="false">
<listOfReactants>
<speciesReference species="pIFNRJ2_STATc" stoichiometry="1"/>
</listOfReactants>
<listOfProducts>
<speciesReference species="pIFNRJ2" stoichiometry="1"/>
<speciesReference species="pSTATc" stoichiometry="1"/>
</listOfProducts>
<kineticLaw>
<math xmlns="http://www.w3.org/1998/Math/MathML">
  <apply>
    <times/>
    <ci> kf6_jak </ci>
    <ci> pIFNRJ2_STATc </ci>
  </apply>
</math>
</kineticLaw>
</reaction>
<reaction id="R377" metaid="metaid_0000564" reversible="true">
<listOfReactants>
<speciesReference species="pIFNRJ2" stoichiometry="1"/>
<speciesReference species="pSTATc" stoichiometry="1"/>
</listOfReactants>
<listOfProducts>
<speciesReference species="pIFNRJ2_pSTATc" stoichiometry="1"/>
</listOfProducts>
<kineticLaw>
<math xmlns="http://www.w3.org/1998/Math/MathML">
  <apply>
    <minus/>
    <apply>
      <times/>
      <ci> kf7_jak </ci>
      <ci> pIFNRJ2 </ci>
      <ci> pSTATc </ci>
    </apply>
  </apply>
  <times/>
  <ci> kr7_jak </ci>

```

```

    <ci> pIFNRJ2_pSTATc </ci>
  </apply>
</apply>
</math>
</kineticLaw>
</reaction>
<reaction id="R378" metaid="metaid_0000565" reversible="true">
<listOfReactants>
<speciesReference species="pSTATc" stoichiometry="2"/>
</listOfReactants>
<listOfProducts>
<speciesReference species="pSTATc_pSTATc" stoichiometry="1"/>
</listOfProducts>
<kineticLaw>
<math xmlns="http://www.w3.org/1998/Math/MathML">
  <apply>
    <minus/>
    <apply>
      <times/>
      <ci> kf8_jak </ci>
      <ci> pSTATc </ci>
      <ci> pSTATc </ci>
    </apply>
    <apply>
      <times/>
      <ci> kr8_jak </ci>
      <ci> pSTATc_pSTATc </ci>
    </apply>
  </apply>
</math>
</kineticLaw>
</reaction>
<reaction id="R379" metaid="metaid_0000566" reversible="true">
<listOfReactants>
<speciesReference species="pIFNRJ2" stoichiometry="1"/>
<speciesReference species="SHP" stoichiometry="1"/>
</listOfReactants>
<listOfProducts>
<speciesReference species="pIFNRJ2_SHP" stoichiometry="1"/>
</listOfProducts>
<kineticLaw>
<math xmlns="http://www.w3.org/1998/Math/MathML">
  <apply>
    <minus/>
    <apply>
      <times/>
      <ci> kf9_jak </ci>

```

```

    <ci> pIFNRJ2 </ci>
    <ci> SHP </ci>
  </apply>
  <apply>
    <times/>
    <ci> kr9_jak </ci>
    <ci> pIFNRJ2_SHP </ci>
  </apply>
</apply>
</math>
</kineticLaw>
</reaction>
<reaction id="R380" metaid="metaid_0000567" reversible="false">
  <listOfReactants>
    <speciesReference species="pIFNRJ2_SHP" stoichiometry="1"/>
  </listOfReactants>
  <listOfProducts>
    <speciesReference species="SHP" stoichiometry="1"/>
    <speciesReference species="IFNRJ2" stoichiometry="1"/>
  </listOfProducts>
  <kineticLaw>
    <math xmlns="http://www.w3.org/1998/Math/MathML">
      <apply>
        <times/>
        <ci> kf10_jak </ci>
        <ci> pIFNRJ2_SHP </ci>
      </apply>
    </math>
  </kineticLaw>
</reaction>
<reaction id="R381" metaid="metaid_0000568" reversible="true">
  <listOfReactants>
    <speciesReference species="PPX" stoichiometry="1"/>
    <speciesReference species="pSTATc" stoichiometry="1"/>
  </listOfReactants>
  <listOfProducts>
    <speciesReference species="PPX_pSTATc" stoichiometry="1"/>
  </listOfProducts>
  <kineticLaw>
    <math xmlns="http://www.w3.org/1998/Math/MathML">
      <apply>
        <minus/>
        <apply>
          <times/>
          <ci> kf11_jak </ci>
          <ci> PPX </ci>
          <ci> pSTATc </ci>
        </apply>
      </apply>
    </math>
  </kineticLaw>
</reaction>

```

```

</apply>
<apply>
  <times/>
  <ci> kr11_jak </ci>
  <ci> PPX_pSTATc </ci>
</apply>
</apply>
</math>
</kineticLaw>
</reaction>
<reaction id="R382" metaid="metaid_0000569" reversible="false">
<listOfReactants>
<speciesReference species="PPX_pSTATc" stoichiometry="1"/>
</listOfReactants>
<listOfProducts>
<speciesReference species="PPX" stoichiometry="1"/>
<speciesReference species="STATc" stoichiometry="1"/>
</listOfProducts>
<kineticLaw>
<math xmlns="http://www.w3.org/1998/Math/MathML">
  <apply>
    <times/>
    <ci> kf12_jak </ci>
    <ci> PPX_pSTATc </ci>
  </apply>
</math>
</kineticLaw>
</reaction>
<reaction id="R383" metaid="metaid_0000570" reversible="true">
<listOfReactants>
<speciesReference species="PPX" stoichiometry="1"/>
<speciesReference species="pSTATc_pSTATc" stoichiometry="1"/>
</listOfReactants>
<listOfProducts>
<speciesReference species="PPX_pSTATc_pSTATc" stoichiometry="1"/>
</listOfProducts>
<kineticLaw>
<math xmlns="http://www.w3.org/1998/Math/MathML">
  <apply>
    <minus/>
    <apply>
      <times/>
      <ci> kf11_jak </ci>
      <ci> PPX </ci>
      <ci> pSTATc_pSTATc </ci>
    </apply>
  </apply>
</math>

```

```

    </times/>
    <ci> kr11_jak </ci>
    <ci> PPX_pSTATc_pSTATc </ci>
  </apply>
</apply>
</math>
</kineticLaw>
</reaction>
<reaction id="R384" metaid="metaid_0000571" reversible="false">
<listOfReactants>
<speciesReference species="PPX_pSTATc_pSTATc" stoichiometry="1"/>
</listOfReactants>
<listOfProducts>
<speciesReference species="PPX" stoichiometry="1"/>
<speciesReference species="pSTATc_STATc" stoichiometry="1"/>
</listOfProducts>
<kineticLaw>
<math xmlns="http://www.w3.org/1998/Math/MathML">
  <apply>
    <times/>
    <ci> kf12_jak </ci>
    <ci> PPX_pSTATc_pSTATc </ci>
  </apply>
</math>
</kineticLaw>
</reaction>
<reaction id="R385" metaid="metaid_0000572" reversible="true">
<listOfReactants>
<speciesReference species="STATc" stoichiometry="1"/>
<speciesReference species="pSTATc" stoichiometry="1"/>
</listOfReactants>
<listOfProducts>
<speciesReference species="pSTATc_STATc" stoichiometry="1"/>
</listOfProducts>
<kineticLaw>
<math xmlns="http://www.w3.org/1998/Math/MathML">
  <apply>
    <minus/>
    <apply>
      <times/>
      <ci> kf13_jak </ci>
      <ci> STATc </ci>
      <ci> pSTATc </ci>
    </apply>
  </apply>
  <times/>
  <ci> kr13_jak </ci>

```



```

    <ci> pSTATc_STATc </ci>
  </apply>
</apply>
</math>
</kineticLaw>
</reaction>
<reaction id="R386" metaid="metaid_0000573" reversible="false">
<listOfReactants>
<speciesReference species="pSTATc_pSTATc" stoichiometry="1"/>
</listOfReactants>
<listOfProducts>
<speciesReference species="pSTATn_pSTATn" stoichiometry="1"/>
</listOfProducts>
<kineticLaw>
<math xmlns="http://www.w3.org/1998/Math/MathML">
  <apply>
    <times/>
    <ci> kf14_jak </ci>
    <ci> pSTATc_pSTATc </ci>
  </apply>
</math>
</kineticLaw>
</reaction>
<reaction id="R387" metaid="metaid_0000574" reversible="true">
<listOfReactants>
<speciesReference species="pSTATn" stoichiometry="2"/>
</listOfReactants>
<listOfProducts>
<speciesReference species="pSTATn_pSTATn" stoichiometry="1"/>
</listOfProducts>
<kineticLaw>
<math xmlns="http://www.w3.org/1998/Math/MathML">
  <apply>
    <minus/>
    <apply>
      <times/>
      <ci> kf7_jak </ci>
      <ci> pSTATn </ci>
      <ci> pSTATn </ci>
    </apply>
    <apply>
      <times/>
      <ci> kr7_jak </ci>
      <ci> pSTATn_pSTATn </ci>
    </apply>
  </apply>
</math>

```

```

</kineticLaw>
</reaction>
<reaction id="R388" metaid="metaid_0000575" reversible="true">
<listOfReactants>
<speciesReference species="PPN" stoichiometry="1"/>
<speciesReference species="pSTATn" stoichiometry="1"/>
</listOfReactants>
<listOfProducts>
<speciesReference species="PPN_pSTATn" stoichiometry="1"/>
</listOfProducts>
<kineticLaw>
<math xmlns="http://www.w3.org/1998/Math/MathML">
  <apply>
    <minus/>
    <apply>
      <times/>
      <ci> kf15_jak </ci>
      <ci> PPN </ci>
      <ci> pSTATn </ci>
    </apply>
    <apply>
      <times/>
      <ci> kr15_jak </ci>
      <ci> PPN_pSTATn </ci>
    </apply>
  </apply>
</math>
</kineticLaw>
</reaction>
<reaction id="R389" metaid="metaid_0000576" reversible="false">
<listOfReactants>
<speciesReference species="PPN_pSTATn" stoichiometry="1"/>
</listOfReactants>
<listOfProducts>
<speciesReference species="PPN" stoichiometry="1"/>
<speciesReference species="STATn" stoichiometry="1"/>
</listOfProducts>
<kineticLaw>
<math xmlns="http://www.w3.org/1998/Math/MathML">
  <apply>
    <times/>
    <ci> kf16_jak </ci>
    <ci> PPN_pSTATn </ci>
  </apply>
</math>
</kineticLaw>
</reaction>

```

```

<reaction id="R390" metaid="metaid_0000577" reversible="true">
<listOfReactants>
<speciesReference species="PPN" stoichiometry="1"/>
<speciesReference species="pSTATn_pSTATn" stoichiometry="1"/>
</listOfReactants>
<listOfProducts>
<speciesReference species="PPN_pSTATn_pSTATn" stoichiometry="1"/>
</listOfProducts>
<kineticLaw>
<math xmlns="http://www.w3.org/1998/Math/MathML">
<apply>
<minus/>
<apply>
<times/>
<ci> kf15_jak </ci>
<ci> PPN </ci>
<ci> pSTATn_pSTATn </ci>
</apply>
<apply>
<times/>
<ci> kr15_jak </ci>
<ci> PPN_pSTATn_pSTATn </ci>
</apply>
</apply>
</math>
</kineticLaw>
</reaction>
<reaction id="R391" metaid="metaid_0000578" reversible="false">
<listOfReactants>
<speciesReference species="PPN_pSTATn_pSTATn" stoichiometry="1"/>
</listOfReactants>
<listOfProducts>
<speciesReference species="PPN" stoichiometry="1"/>
<speciesReference species="STATn_pSTATn" stoichiometry="1"/>
</listOfProducts>
<kineticLaw>
<math xmlns="http://www.w3.org/1998/Math/MathML">
<apply>
<times/>
<ci> kf16_jak </ci>
<ci> PPN_pSTATn_pSTATn </ci>
</apply>
</math>
</kineticLaw>
</reaction>
<reaction id="R392" metaid="metaid_0000579" reversible="true">
<listOfReactants>

```

```

<speciesReference species="STATn" stoichiometry="1"/>
<speciesReference species="pSTATn" stoichiometry="1"/>
</listOfReactants>
<listOfProducts>
<speciesReference species="STATn_pSTATn" stoichiometry="1"/>
</listOfProducts>
<kineticLaw>
<math xmlns="http://www.w3.org/1998/Math/MathML">
  <apply>
    <minus/>
    <apply>
      <times/>
      <ci> kf13_jak </ci>
      <ci> STATn </ci>
      <ci> pSTATn </ci>
    </apply>
    <apply>
      <times/>
      <ci> kr13_jak </ci>
      <ci> STATn_pSTATn </ci>
    </apply>
  </apply>
</math>
</kineticLaw>
</reaction>
<reaction id="R393" metaid="metaid_0000580" reversible="false">
<listOfReactants>
<speciesReference species="STATn" stoichiometry="1"/>
</listOfReactants>
<listOfProducts>
<speciesReference species="STATc" stoichiometry="1"/>
</listOfProducts>
<kineticLaw>
<math xmlns="http://www.w3.org/1998/Math/MathML">
  <apply>
    <times/>
    <ci> kf17_jak </ci>
    <ci> STATn </ci>
  </apply>
</math>
</kineticLaw>
</reaction>
<reaction id="R394" metaid="metaid_0000581" reversible="false">
<listOfReactants>
<speciesReference species="mRNA_nuc" stoichiometry="1"/>
</listOfReactants>
<listOfProducts>

```

```

<speciesReference species="mRNA_cyt" stoichiometry="1"/>
</listOfProducts>
<kineticLaw>
<math xmlns="http://www.w3.org/1998/Math/MathML">
  <apply>
    <times/>
    <ci> kf19_jak </ci>
    <ci> mRNA_nuc </ci>
  </apply>
</math>
</kineticLaw>
</reaction>
<reaction id="R395" metaid="metaid_0000582" reversible="true">
<listOfReactants>
<speciesReference species="SOCS" stoichiometry="1"/>
<speciesReference species="pIFNRJ2" stoichiometry="1"/>
</listOfReactants>
<listOfProducts>
<speciesReference species="SOCS_pIFNRJ2" stoichiometry="1"/>
</listOfProducts>
<kineticLaw>
<math xmlns="http://www.w3.org/1998/Math/MathML">
  <apply>
    <minus/>
    <apply>
      <times/>
      <ci> kf21_jak </ci>
      <ci> SOCS </ci>
      <ci> pIFNRJ2 </ci>
    </apply>
    <apply>
      <times/>
      <ci> kr21_jak </ci>
      <ci> SOCS_pIFNRJ2 </ci>
    </apply>
  </apply>
</math>
</kineticLaw>
</reaction>
<reaction id="R396" metaid="metaid_0000583" reversible="true">
<listOfReactants>
<speciesReference species="STATc" stoichiometry="1"/>
<speciesReference species="SOCS_pIFNRJ2" stoichiometry="1"/>
</listOfReactants>
<listOfProducts>
<speciesReference species="SOCS_pIFNRJ2_STAT" stoichiometry="1"/>
</listOfProducts>

```

```

<kineticLaw>
<math xmlns="http://www.w3.org/1998/Math/MathML">
  <apply>
    <minus/>
    <apply>
      <times/>
      <ci> kf5_jak </ci>
      <ci> STATc </ci>
      <ci> SOCS_pIFNRJ2 </ci>
    </apply>
    <apply>
      <times/>
      <ci> kr5_jak </ci>
      <ci> SOCS_pIFNRJ2_STAT </ci>
    </apply>
  </apply>
</math>
</kineticLaw>
</reaction>
<reaction id="R397" metaid="metaid_0000584" reversible="true">
<listOfReactants>
<speciesReference species="SHP" stoichiometry="1"/>
<speciesReference species="SOCS_pIFNRJ2_STAT" stoichiometry="1"/>
</listOfReactants>
<listOfProducts>
<speciesReference species="SOCS_pIFNRJ2_STAT_SHP" stoichiometry="1"/>
</listOfProducts>
<kineticLaw>
<math xmlns="http://www.w3.org/1998/Math/MathML">
  <apply>
    <minus/>
    <apply>
      <times/>
      <ci> kf9_jak </ci>
      <ci> SHP </ci>
      <ci> SOCS_pIFNRJ2_STAT </ci>
    </apply>
    <apply>
      <times/>
      <ci> kr9_jak </ci>
      <ci> SOCS_pIFNRJ2_STAT_SHP </ci>
    </apply>
  </apply>
</math>
</kineticLaw>
</reaction>
<reaction id="R398" metaid="metaid_0000585" reversible="false">

```

```

<listOfReactants>
<speciesReference species="SOCS_pIFNRJ2_STAT_SHP" stoichiometry="1"/>
</listOfReactants>
<listOfProducts>
<speciesReference species="SHP" stoichiometry="1"/>
<speciesReference species="STATc" stoichiometry="1"/>
<speciesReference species="IFNRJ2" stoichiometry="1"/>
<speciesReference species="SOCS" stoichiometry="1"/>
</listOfProducts>
<kineticLaw>
<math xmlns="http://www.w3.org/1998/Math/MathML">
  <apply>
    <times/>
    <ci> kf10_jak </ci>
    <ci> SOCS_pIFNRJ2_STAT_SHP </ci>
  </apply>
</math>
</kineticLaw>
</reaction>
<reaction id="R399" metaid="metaid_0000586" reversible="false">
<listOfReactants>
<speciesReference species="SOCS_pIFNRJ2_STAT_SHP" stoichiometry="1"/>
</listOfReactants>
<listOfProducts>
<speciesReference species="SOCS" stoichiometry="1"/>
<speciesReference species="pIFNRJ2_STATc_SHP" stoichiometry="1"/>
</listOfProducts>
<kineticLaw>
<math xmlns="http://www.w3.org/1998/Math/MathML">
  <apply>
    <times/>
    <ci> kf23_jak </ci>
    <ci> SOCS_pIFNRJ2_STAT_SHP </ci>
  </apply>
</math>
</kineticLaw>
</reaction>
<reaction id="R400" metaid="metaid_0000587" reversible="false">
<listOfProducts>
<speciesReference species="mRNA_nuc" stoichiometry="1"/>
</listOfProducts>
<listOfModifiers>
<modifierSpeciesReference species="pSTATn_pSTATn"/>
</listOfModifiers>
<kineticLaw>
<math xmlns="http://www.w3.org/1998/Math/MathML">

```

```

<apply>
  <divide/>
  <apply>
    <times/>
    <ci> k18a_jak </ci>
    <ci> pSTATn_pSTATn </ci>
  </apply>
  <apply>
    <plus/>
    <ci> k18b_jak </ci>
    <ci> pSTATn_pSTATn </ci>
  </apply>
</apply>
</math>
</kineticLaw>
</reaction>
<reaction id="R401" metaid="metaid_0000588" reversible="false">
<listOfReactants>
<speciesReference species="mRNA_cyt" stoichiometry="1"/>
</listOfReactants>
<listOfProducts>
<speciesReference species="mRNA_cyt" stoichiometry="1"/>
</listOfProducts>
<kineticLaw>
<math xmlns="http://www.w3.org/1998/Math/MathML">
  <apply>
    <times/>
    <apply>
      <minus/>
      <ci> kf22_jak </ci>
    </apply>
    <ci> mRNA_cyt </ci>
  </apply>
</math>
</kineticLaw>
</reaction>
<reaction id="R402" metaid="metaid_0000589" reversible="false">
<listOfReactants>
<speciesReference species="SOCS" stoichiometry="1"/>
</listOfReactants>
<listOfProducts>
<speciesReference species="SOCS" stoichiometry="1"/>
</listOfProducts>
<kineticLaw>
<math xmlns="http://www.w3.org/1998/Math/MathML">
  <apply>
    <times/>

```



```
<apply>
  <minus/>
  <ci> kf23_jak </ci>
</apply>
<ci> SOCS </ci>
</apply>
</math>
</kineticLaw>
</reaction>
<reaction id="R403" metaid="metaid_0000590" reversible="false">
<listOfReactants>
<speciesReference species="mRNA_cyt" stoichiometry="1"/>
</listOfReactants>
<listOfProducts>
<speciesReference species="SOCS" stoichiometry="1"/>
</listOfProducts>
<kineticLaw>
<math xmlns="http://www.w3.org/1998/Math/MathML">
  <apply>
    <times/>
    <ci> kf20_jak </ci>
    <ci> mRNA_cyt </ci>
  </apply>
</math>
</kineticLaw>
</reaction>
</listOfReactions>
</model>
</sbml>
```
